# Supplementary material
Source: PubMed Central journal article supplement (PMC7944975)
Supplement: NEJMoa2101765_appendix.pdf [file NEJMoa2101765_appendix.pdf]

## Supplementary Appendix

This appendix has been provided by the authors to give readers additional information about their work.

Supplement to: Dagan N, Barda N, Kepten E, et al. BNT162b2 mRNA Covid-19 vaccine in a nationwide mass vaccination setting. *N Engl J Med*. DOI: [10.1056/NEJMoa2101765](https://doi.org/10.1056/NEJMoa2101765)

# **BNT162b2 mRNA Covid-19 Vaccine in a Nationwide Mass Vaccination Setting**

Noa Dagan, MD<sup>\*1,2</sup>; Noam Barda, MD<sup>\*1,2</sup>; Eldad Kepten, PhD<sup>1</sup>; Oren Miron, MA<sup>1,3</sup>; Shay Perchik, MA<sup>1</sup>; Mark A. Katz, MD<sup>1,3,4</sup>; Miguel A. Hernán, MD<sup>5,6</sup>; Marc Lipsitch, DPhil<sup>7</sup>; Ben Reis, PhD<sup>8,9</sup>; Ran D. Balicer, MD<sup>1,3</sup>

<sup>1</sup> Clalit Research Institute, Innovation Division, Clalit Health Services, Tel Aviv, Israel

<sup>2</sup> Department of Biomedical Informatics, Harvard Medical School, Boston, MA, USA

<sup>3</sup> School of Public Health, Faculty of Health Sciences, Ben Gurion University of the Negev, Be'er Sheva, Israel

<sup>4</sup> University of Michigan School of Public Health, Ann Arbor, Michigan, USA

<sup>5</sup> Departments of Epidemiology and Biostatistics, Harvard T.H. Chan School of Public Health, Boston, MA, USA

<sup>6</sup> Harvard-MIT Division of Health Sciences and Technology, Boston, MA, USA

<sup>7</sup> Center for Communicable Disease Dynamics, Department of Epidemiology and Department of Immunology and Infectious Diseases, Harvard T.H. Chan School of Public Health, Boston, MA, USA

<sup>8</sup> Predictive Medicine Group, Computational Health Informatics Program, Boston Children's Hospital, Boston, MA, USA

<sup>9</sup> Harvard Medical School, Boston, MA, USA

\* These authors contributed equally.

## **Corresponding Author:**

Ran D. Balicer, MD, PhD, MPH

Clalit Research Institute, Innovation Division, Clalit Health Services, Tel Aviv, Israel

[Rbalicer@clalit.org.il](mailto:Rbalicer@clalit.org.il)

# Supplementary Materials

## Contents

|                                                                                                                                                                       |    |
|-----------------------------------------------------------------------------------------------------------------------------------------------------------------------|----|
| Supplementary Methods 1 – Data Repositories.....                                                                                                                      | 3  |
| Supplementary Methods 2 – Author Access to the Data and Author contribution.....                                                                                      | 5  |
| Supplementary Methods 3 – Matching Mechanism .....                                                                                                                    | 6  |
| Supplementary Methods 4 – Outcome Periods .....                                                                                                                       | 8  |
| Figure S1 – Matching Statistics .....                                                                                                                                 | 10 |
| Figure S2 – Covariate Balance (Love) Plot.....                                                                                                                        | 11 |
| Figure S3 – Time from Initial PCR Swabbing to Outcomes.....                                                                                                           | 12 |
| Figure S4 – Daily Hazard Ratio for the Documented Infection Outcome .....                                                                                             | 14 |
| Figure S5 – Cumulative Incidence of Asymptomatic Infection Proxy.....                                                                                                 | 15 |
| Figure S6 – Comparison of the Cumulative Incidence of COVID-19, Magnified on the Early<br>Follow-up Period, Between the Final and the Minimally Matched Analysis..... | 16 |
| Figure S7 – Cumulative Incidence Curves when Delaying Censoring of Vaccinated Controls .....                                                                          | 18 |
| Figure S8 – Cumulative Incidence Curves for the Main Analysis on the Full Y Axis Scale .....                                                                          | 23 |
| Table S1 – Variable Definitions.....                                                                                                                                  | 28 |
| Table S2 – Vaccinated Individuals: Total, Eligible and Matched.....                                                                                                   | 36 |
| Table S3 – Vaccine Effectiveness for Asymptomatic Infection Proxy .....                                                                                               | 38 |
| Table S4 – Vaccine Effectiveness Estimates for Additional Periods.....                                                                                                | 39 |
| Table S5 – Risk Ratios and Risk Differences for the Sensitivity Analysis when Delaying<br>Censoring of Vaccinated Controls.....                                       | 40 |
| Table S6 – Full Analysis Results .....                                                                                                                                | 41 |
| Table S7 – Life Tables using the Kaplan-Meier Approach .....                                                                                                          | 46 |
| References .....                                                                                                                                                      | 55 |

## Supplementary Methods 1 – Data Repositories

In Israel, health insurance is mandatory for all permanent residents since 1995. Each resident is obliged by law to be a member of one of four healthcare organizations dubbed “health funds”.

The choice of which health fund to join is completely voluntary, and each resident is free to switch between health funds several times a year. The health funds are not allowed to condition membership on any factor, and specifically not on a person’s health.

Israeli law defines a rich set of services to be provided to each member by his or her health fund, called the “health basket”. This basket includes the full range of medical services. To provide these services, the health funds function as integrated payers-providers – directly supplying some services and purchasing the rest from external suppliers.

Data in this study comes from the electronic medical records of Clalit Health Services (CHS), the largest of these four health funds, insuring 53% of Israel’s population. CHS pools data from its many operational systems into a unified analytic data warehouse that is used for policy and research. This data repository includes detailed information on primary care, secondary care, hospitalizations, medications, laboratory results and imaging tests.

The Israel health system was digitized around the year 2000. The drop-out rate from CHS is 1-2% yearly. Owing to this early adoption of electronic medical records and the low yearly drop-out rate, CHS has good long term follow-up of patients.

Since the start of the COVID-19 pandemic, the Israeli Ministry of Health (MOH) has been collecting all COVID-19 related data centrally. These include complete data on PCR testing, vaccination status, hospitalizations, daily status definitions during hospitalization, and COVID-19 related deaths. The MOH transfers this data daily to the health funds. This allows integration of background longitudinal medical information with real-time vaccination status and all COVID-19 related outcomes for the entire CHS patient population.

This integrated data was used to generate the dataset for this study. The derivation cohort for the study consisted of the entire CHS population as of December 2020 (the beginning of the COVID-19 vaccination campaign in Israel) who were over the age of 16 and without previous positive COVID-19 PCR. These data were cross-referenced with background medical data, vaccination data and data on COVID-19 outcomes.

## Supplementary Methods 2 – Author Access to the Data and Author contribution

ND, NB, OM, SP and EK saw the original data, collected it and analyzed it.

ND, NB, EK, MAK, MAH, ML, BR and RDB conceived and designed the study.

ND, NB, MAH, ML, BR and RDB wrote the manuscript.

All authors critically reviewed the manuscript and decided to proceed with publication.

RDB and BR supervised the study process.

RDB vouches for the data and analysis.

No commercial agreements pertain to this study, specifically no agreements that relate to confidentiality.

## Supplementary Methods 3 – Matching Mechanism

Vaccinated and unvaccinated were matched on the following variables in the following ways:

- Age – in bins of two consecutive years.
- Sex (male, female) – exact matching.
- Place of residence – exact matching, at the level of neighborhood or small town.
- Population Sector (general Jewish, Arab, ultra-orthodox Jewish) – exact matching.
- Influenza vaccines in the past 5 years (0, 1-2, 3-4, 5) – exact matching.
- Pregnancy (yes, no) – exact matching.
- Count of pre-existing conditions considered by the CDC as risk criteria (0,1,2,3,4+) – exact matching.

We illustrate the matching process with an example: A 76 year old ultra-orthodox Jewish male from a specific neighborhood, who received 4 influenza vaccines in the last five years and has 2 comorbidities that are known risk factors for severe COVID-19, could only be matched with a similar ultra-orthodox Jewish male from the same neighborhood, aged 76-77 years, with 3-4 influenza vaccine count, and 2 comorbidities.

Selection of variables for matching was done in two stages. First, a set of variables was chosen based on domain expertise. This set was then gradually trimmed while ensuring that exchangeability was maintained. Exchangeability was evaluated using vaccine effectiveness for COVID-19 symptomatic infection in the first 14 days after the 1<sup>st</sup> dose, which was close to 0 in the RCT<sup>1</sup>.

Matching was performed using a “rolling cohort” design. Starting from the beginning of the vaccination campaign, each day all newly vaccinated patients who complied with the study’s inclusion and exclusion criteria were candidates for matching, including those who had previously been included as unvaccinated controls. They were matched with unexposed

(unvaccinated) controls that complied with the inclusion and exclusion criteria and were not previously recruited. If at a later date an unexposed control was vaccinated, he or she was censored from the unexposed group together with his or her exposed match, and a new matched unvaccinated control was sought so that this newly vaccinated individual could be included as a vaccinated person.



## Supplementary Methods 4 – Outcome Periods

Risk (or cumulative incidence) is defined as the probability of developing the event between the start of follow-up and the end of the period of interest. Risk ratios can be used to compare the risks in two groups, e.g., vaccinated and unvaccinated. In the absence of confounding, a risk ratio is an effect measure on the multiplicative scale.

Studies often refer to period-specific “risks”. For example, “risk during the period of 14-20 days after vaccination” is defined as the probability of the event between days 14 and 20 of follow-up among those vaccinated on day 0 and still at risk on day 14. These probabilities are discrete-time hazards rather than true risks. The ratios of period-specific hazards cannot be generally endowed with a causal interpretation, even in randomized trials, because of potentially differential selection between time zero and the beginning of the period. For example, in the presence of an effective vaccine, those at highest risk of the outcome will be preferentially depleted from the control arm compared with the vaccine arm, and thus analyses on those who have not experienced the outcome by some post-randomization time will be in a selected population in which the control group has lower average risk than the vaccine group<sup>2,3</sup>. This bias is exacerbated in outcomes, like SARS-CoV-2 infection, that are sometimes unobserved (e.g. not all asymptomatic infections are observed<sup>4</sup>). However, in our study, this selection bias is not expected for vaccinated and unvaccinated individuals who are still at-risk on day 14 of follow-up because the risks are expected to be similar in the vaccine and control groups during days 0-13<sup>5</sup>. If there is little or no difference in risk during days 0-13, the difference of hazards for the period 14-20 days is expected to equal the risk difference for the period 0-20 days. However, the ratios of hazards and risks will differ. Therefore, the magnitude of “vaccine effectiveness” (which is traditionally defined as one minus the hazard ratio) is sensitive to the inclusion of the early period during which no effect is detectable. As a result, many randomized trials exclude the early period from their analyses.

In this paper, for simplicity, we informally refer to period-specific discrete-time hazards as period-specific risks and to the ratio of these quantities in the vaccinated and unvaccinated populations as risk ratios. We then present these ratios for the period that starts 14 days after baseline. Strictly speaking, the vaccine effectiveness based on this risk ratio overestimates the overall vaccine effectiveness in our study because it does not include the early follow-up period during which the vaccine has no detectable effect (and thus during which the ratio is 1).

However, in a study with a longer follow-up, the relative weight of the early period would be smaller in the calculation of the overall ratio, and thus the overall “vaccine effectiveness” would be closer to the one we report for the period  $\geq 14$  days after baseline.

Randomized trials often go further and present period-specific ratios (or their corresponding estimates of “vaccine effectiveness”) for periods that start long after the effect of vaccination is detectable. A causal interpretation of these ratios is not warranted because of potential selection bias. However, for comparison purposes, we present results for periods analogous to those reported in the published randomized trial of this vaccine<sup>6</sup>.

The use of these period-specific ratios is an attempt to estimate the risk ratio from a hypothetical study in which individuals are randomly vaccinated on day 0 and in which both vaccinated and unvaccinated individuals are somehow kept unexposed to the virus until the beginning of the period<sup>2</sup>. Under certain assumptions, it may be argued that the period-specific ratios reported in randomized trials and in our paper are upper bound estimates of this hypothetical risk ratio, corresponding to lower-bound estimates of VE.

Figure S1 – Matching Statistics

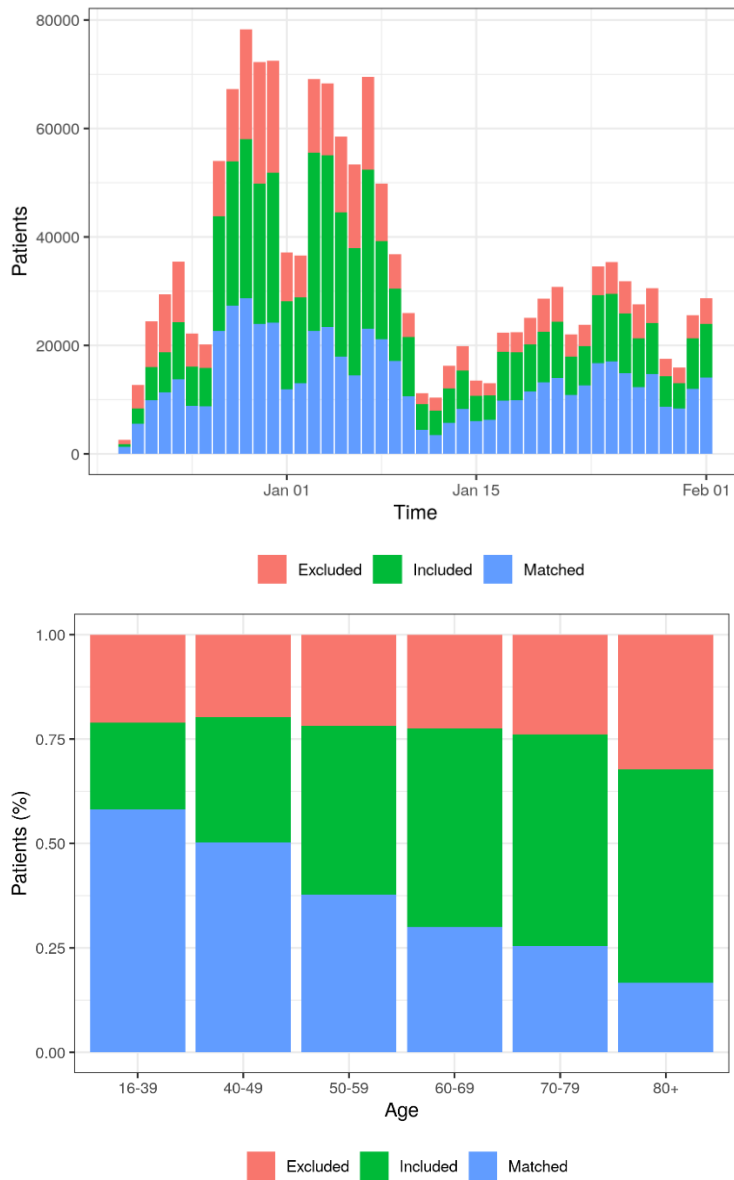

Legend:

Top: Absolute number of patients excluded, included-but-not-matched, and matched, at each day since start of the vaccination campaign.

Bottom: Proportion of patients excluded, included-but-not-matched, and matched, at each age group.

Figure S2 – Covariate Balance (Love) Plot

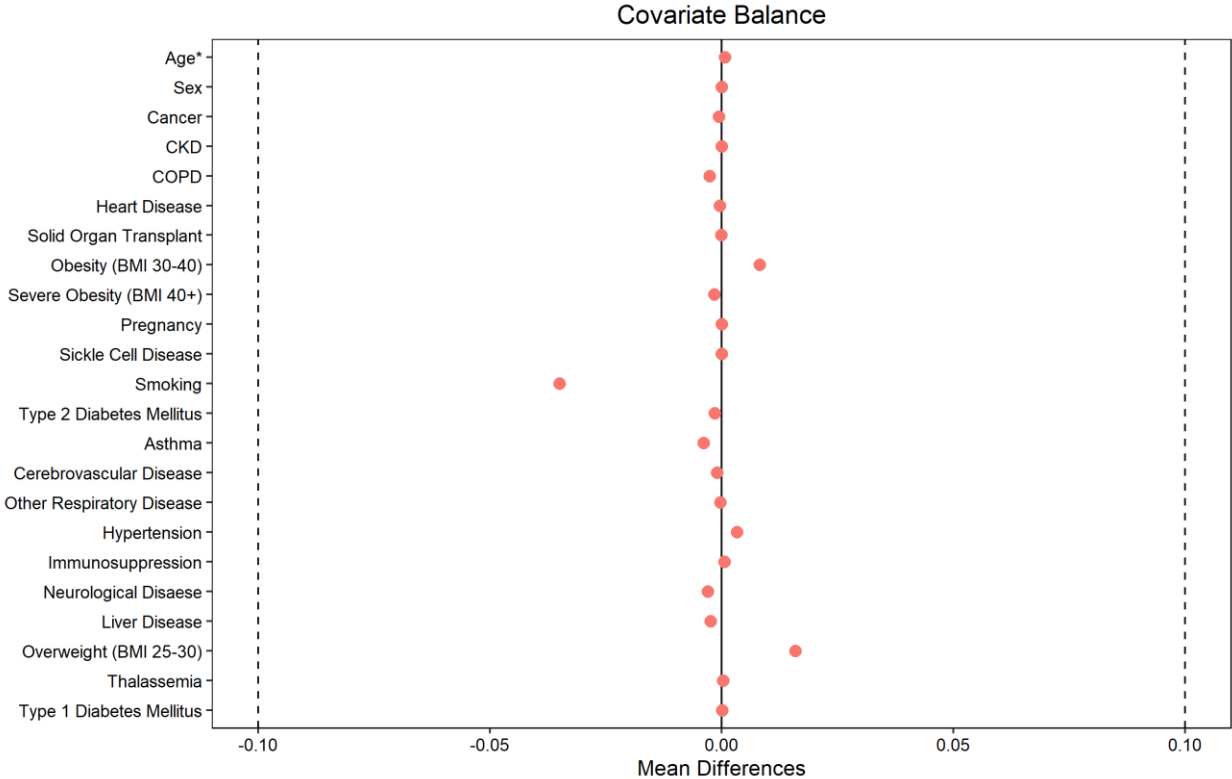

Legend: A covariate balance (Love) plot showing the difference in means for the different CDC risk criteria. A strict balance cut-off was set at 0.17.

\* The mean difference for age (a continuous variable) is standardized.

Figure S3 – Time from Initial PCR Swabbing to Outcomes

**A**

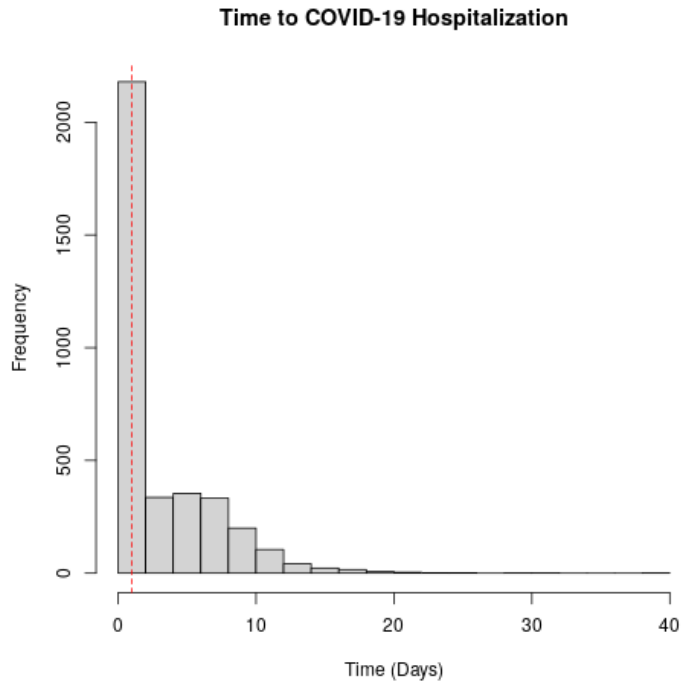

**B**

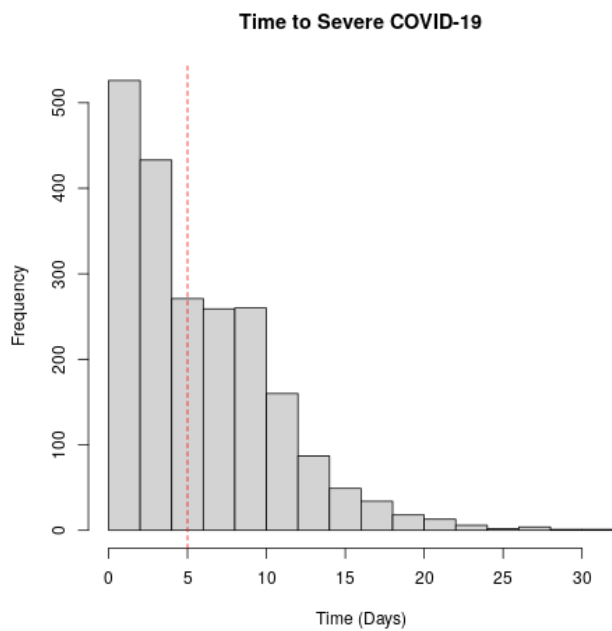

**C**

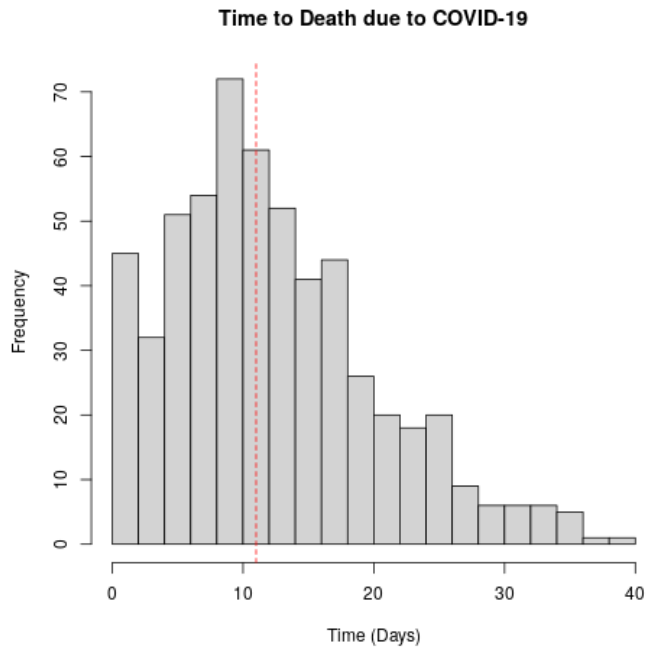

Legend: Histograms showing the distribution of time (in days) from the date the first positive PCR test was sampled until incidence of the different outcomes: hospitalization due to COVID-19 (Panel A), severe COVID-19 (Panel B) and death due to COVID-19 (Panel C). A dashed vertical red line in each plot shows the median.

Figure S4 – Daily Hazard Ratio for the Documented Infection Outcome

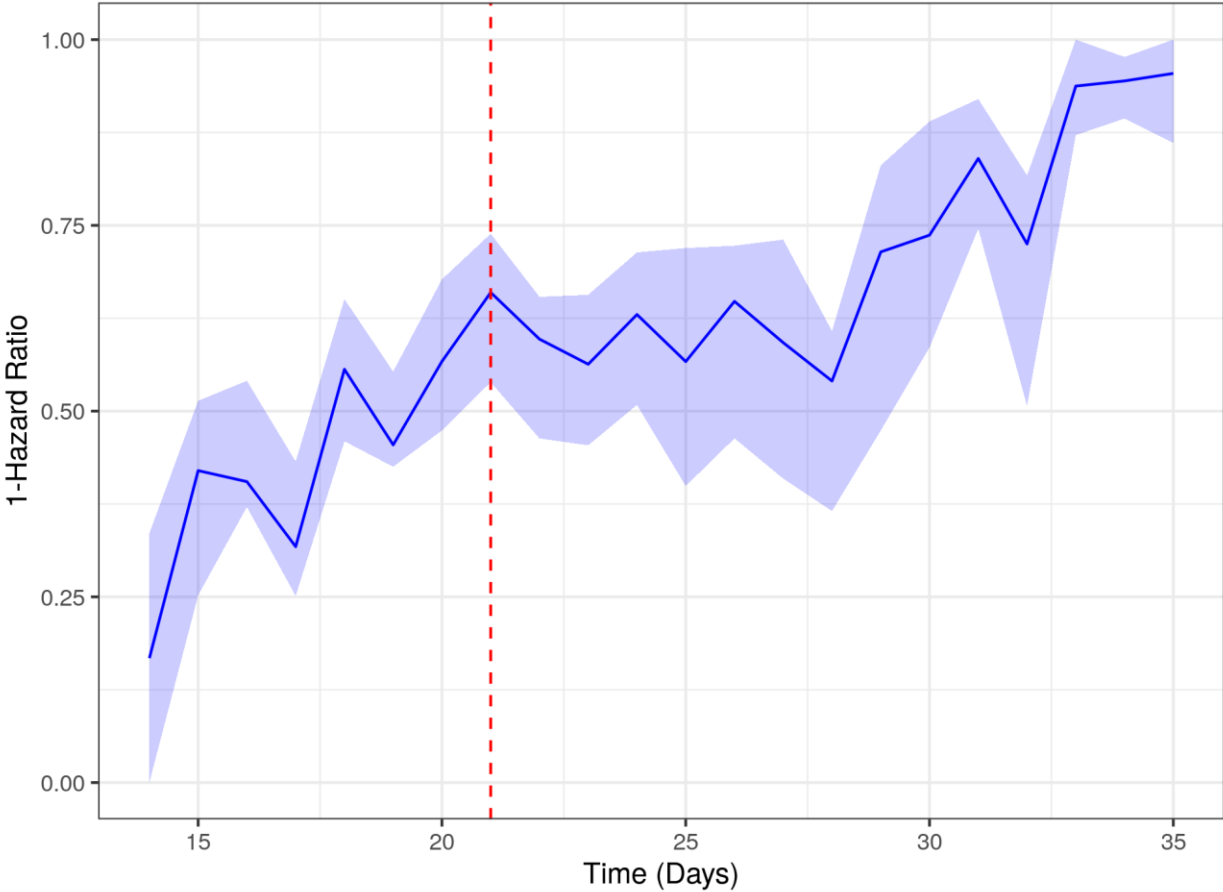

Legend: One-minus the hazard ratio between vaccinated and unvaccinated groups for the documented infection outcome, per day, for days 14-35 after the first dose. The shaded region is the daily 95% confidence interval, derived using the percentile bootstrap method with 500 repetitions. A vertical dashed red line denotes 21 days, the intended receipt day of the second dose.

Figure S5 – Cumulative Incidence of Asymptomatic Infection Proxy

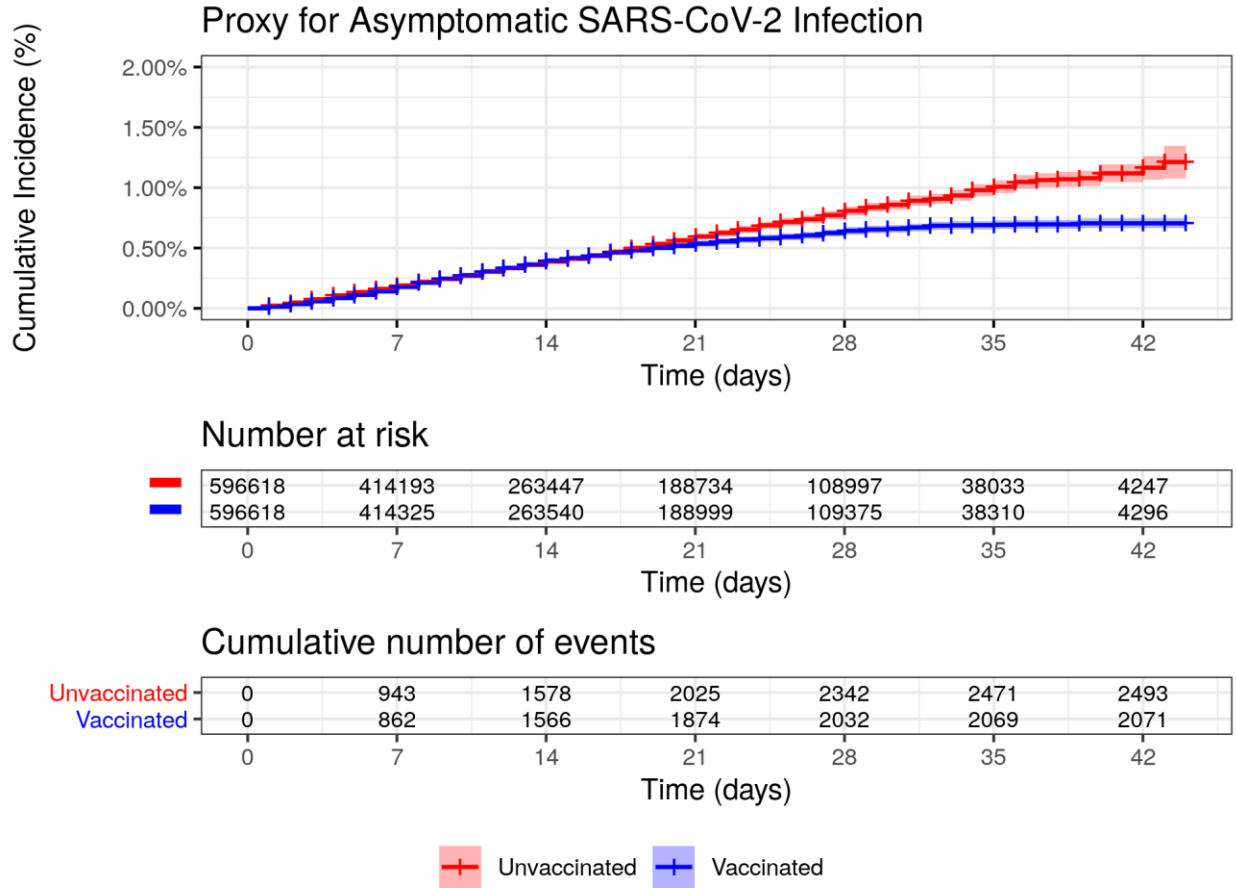

Legend: Cumulative incidence curve (one minus the Kaplan-Meier risk) for the proxy for the asymptomatic infection outcome starting from the day of the first dose. Shaded areas are 95% confidence intervals. The tables below the curve show the number at risk at each time point and the cumulative number of events. Vaccine effectiveness estimates are included in Table S3.

In the absence of systematic periodic testing for SARS-CoV-2 among asymptomatic people in Israel, documented asymptomatic infections do not account for all asymptomatic infections, and likely cannot accurately capture vaccine effectiveness for this outcome.



Figure S6 – Comparison of the Cumulative Incidence of COVID-19, Magnified on the Early Follow-up Period, Between the Final and the Minimally Matched Analysis

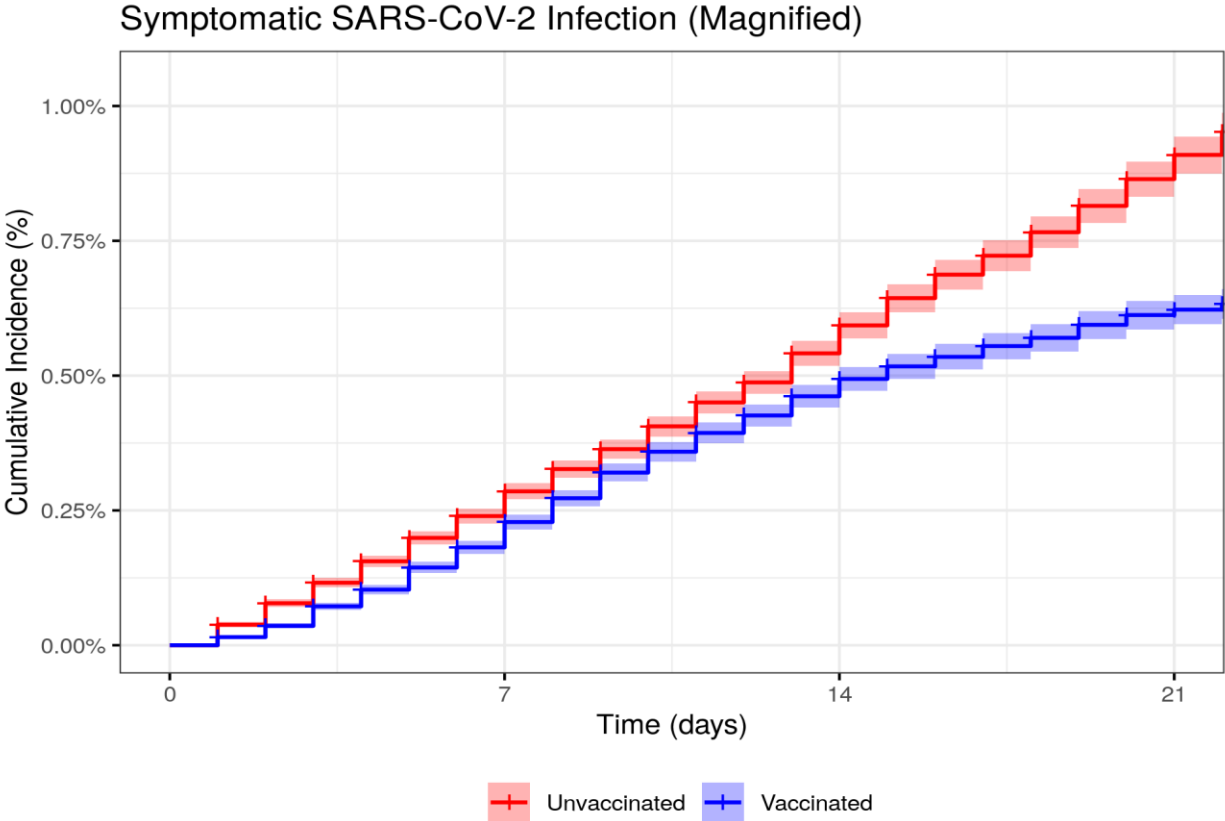

Legend: Cumulative incidence curve (one minus the Kaplan-Meier risk) for the symptomatic infection (COVID-19) outcome in the final analysis. The figure is magnified on the early follow-up period to better show when the curves diverge. Shaded areas are 95% confidence intervals.

### Symptomatic SARS-CoV-2 Infection (Magnified)

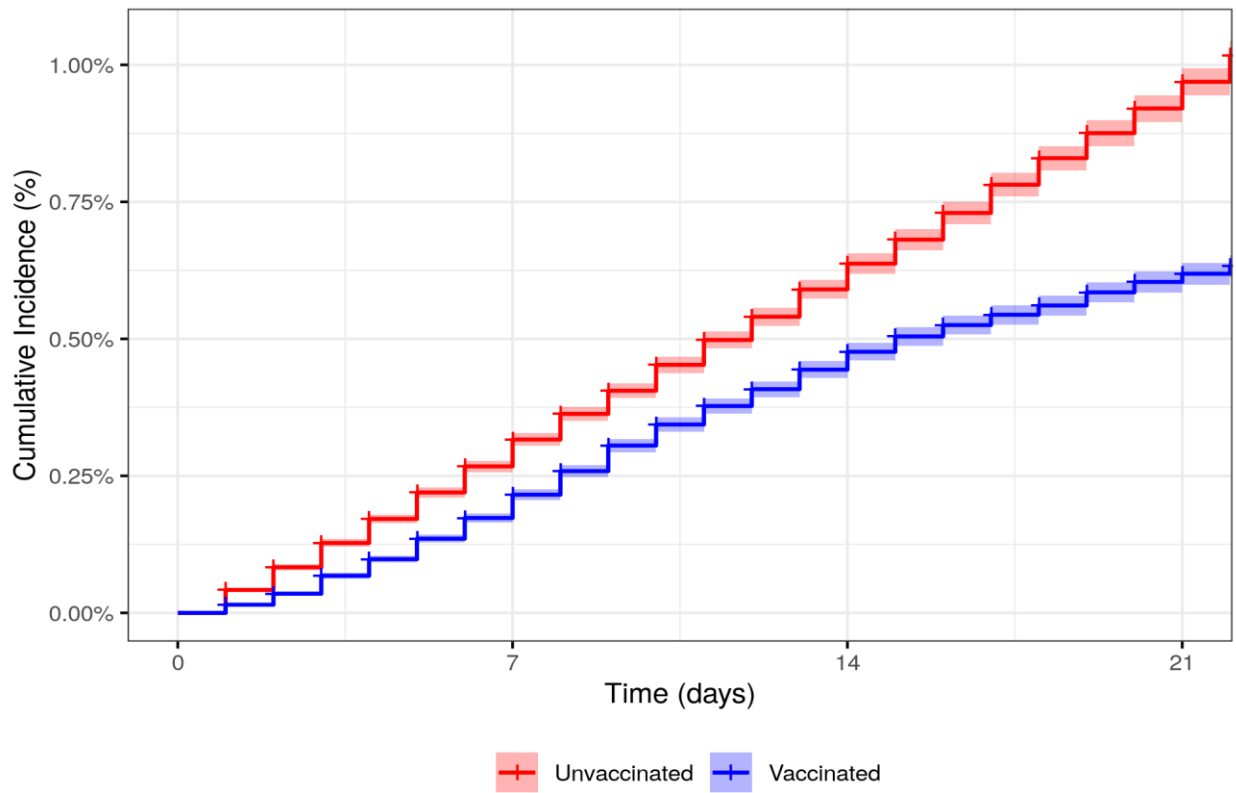

Legend: Cumulative incidence curve (one minus the Kaplan-Meier risk) for the symptomatic infection (COVID-19) outcome when matching only on age and sex. The figure is magnified on the early follow-up period to better show when the curves diverge. Shaded areas are 95% confidence intervals.

Figure S7 – Cumulative Incidence Curves when Delaying Censoring of Vaccinated Controls

A

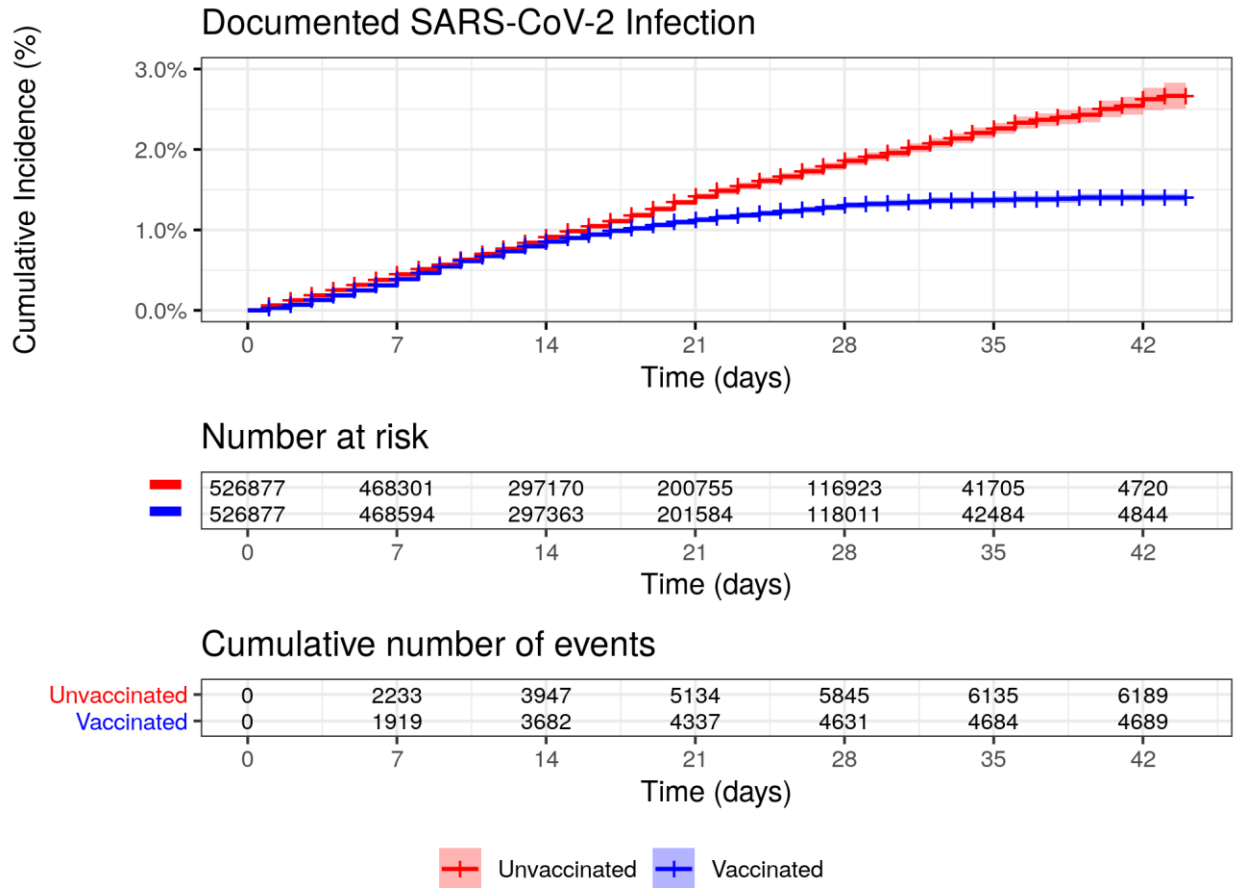

Legend: Cumulative incidence curves (one minus the Kaplan-Meier risk) for the documented infection outcome when delaying the censoring of vaccinated controls. Shaded areas are 95% confidence intervals. The tables below the curve show the number at risk at each time point and the cumulative number of events. Vaccine effectiveness estimates are included in Table S5.

**B**

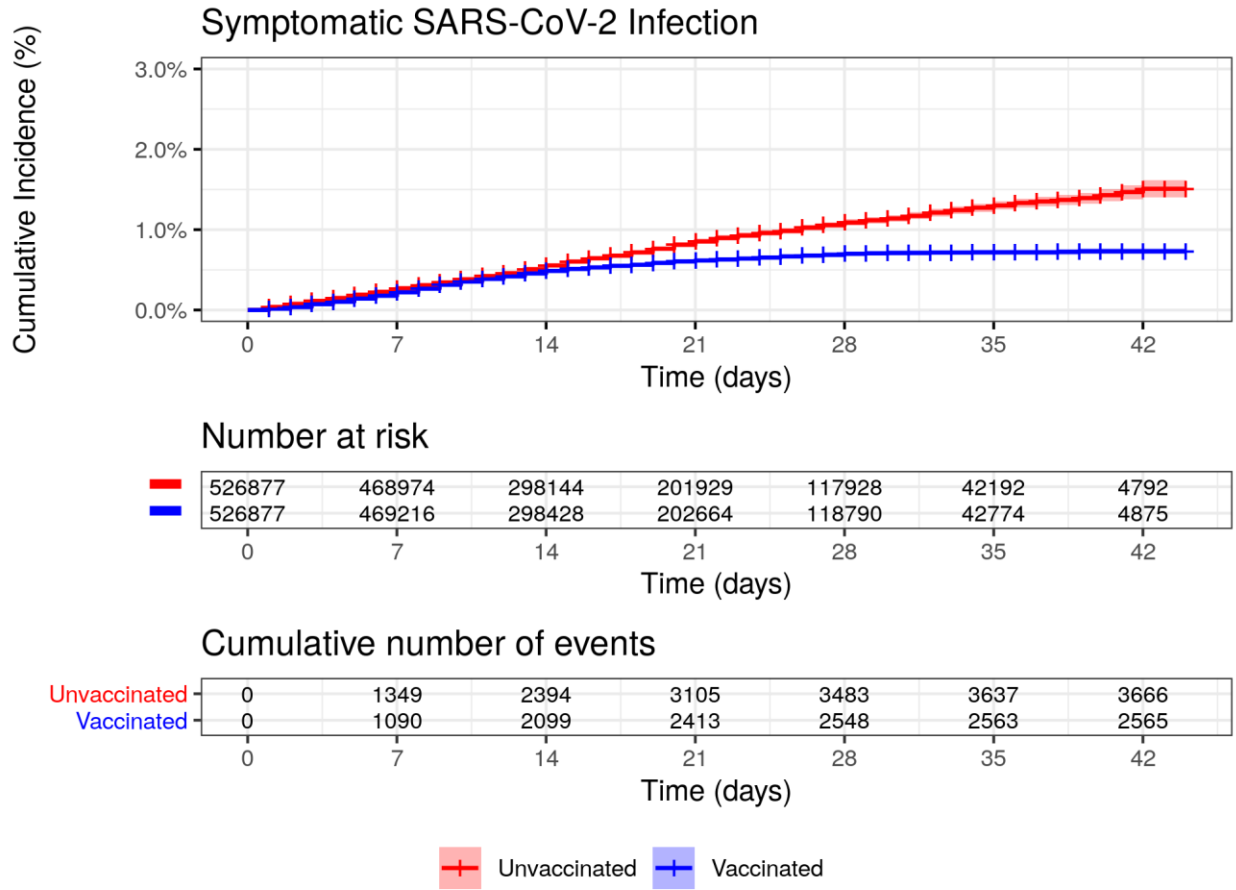

Legend: Cumulative incidence curves (one minus the Kaplan-Meier risk) for the COVID-19 (symptomatic infection) outcome when delaying the censoring of vaccinated controls. Shaded areas are 95% confidence intervals. The tables below the curve show the number at risk at each time point and the cumulative number of events. Vaccine effectiveness estimates are included in Table S5.

C

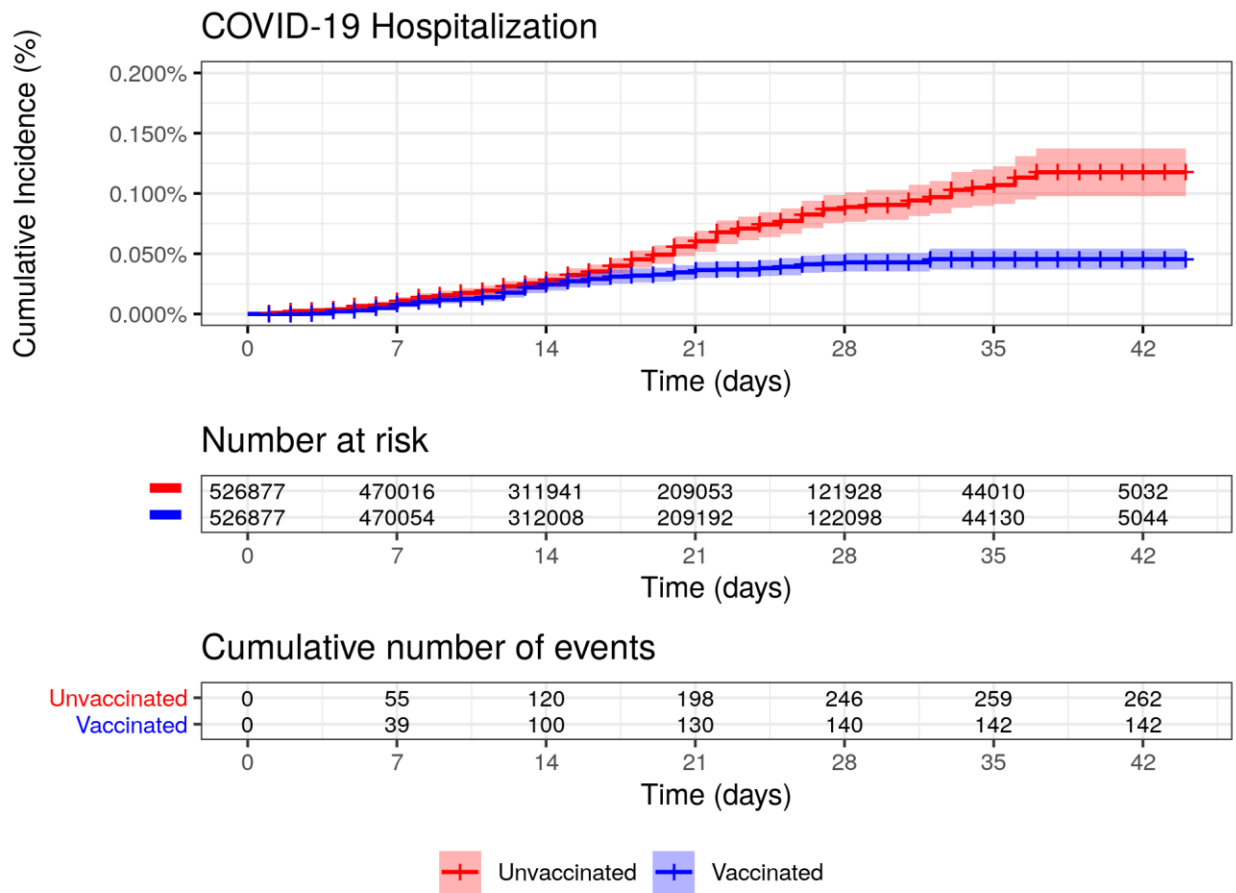

Legend: Cumulative incidence curves (one minus the Kaplan-Meier risk) for the COVID-19 hospitalization outcome when delaying the censoring of vaccinated controls. Shaded areas are 95% confidence intervals. The tables below the curve show the number at risk at each time point and the cumulative number of events. Vaccine effectiveness estimates are included in Table S5.

D

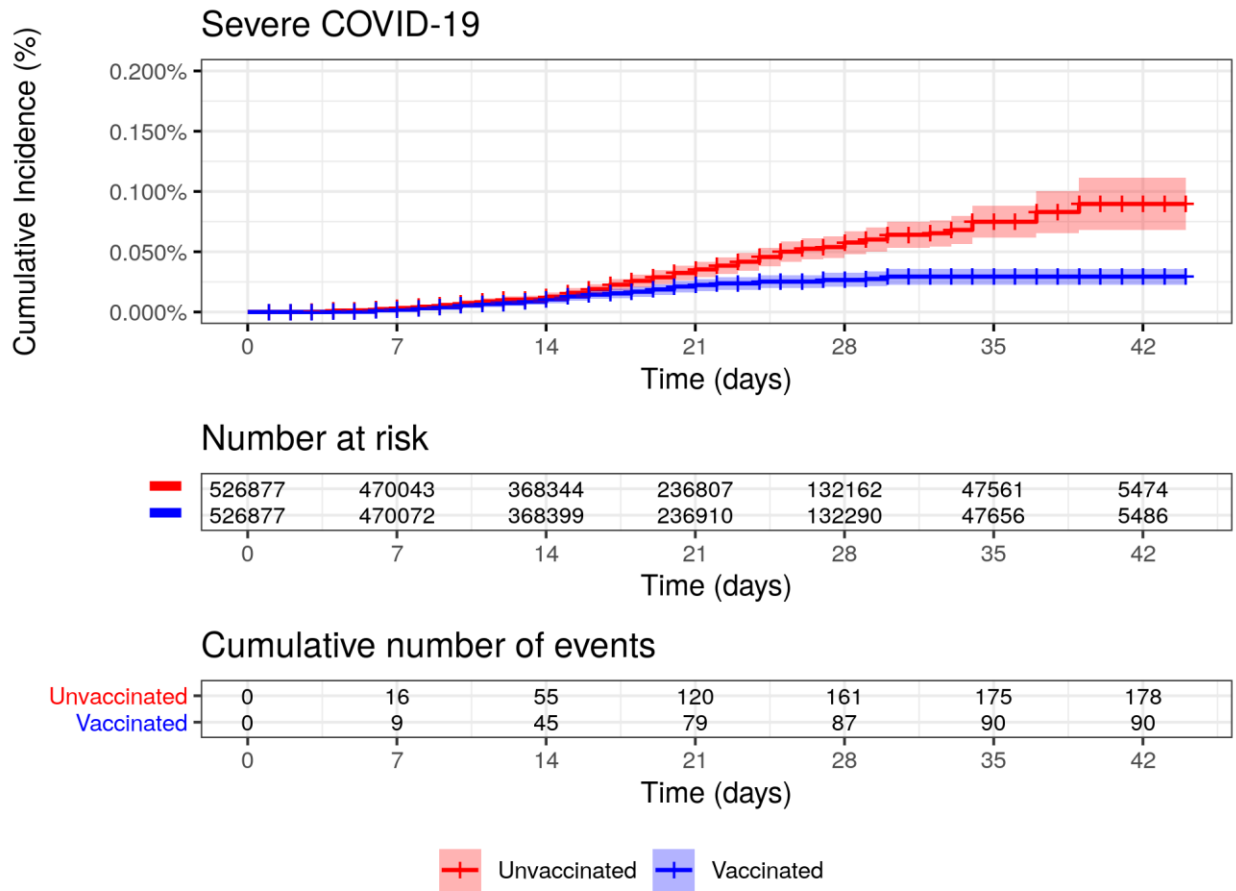

Legend: Cumulative incidence curves (one minus the Kaplan-Meier risk) for the severe COVID-19 outcome when delaying the censoring of vaccinated controls. Shaded areas are 95% confidence intervals. The tables below the curve show the number at risk at each time point and the cumulative number of events. Vaccine effectiveness estimates are included in Table S5.

**E**

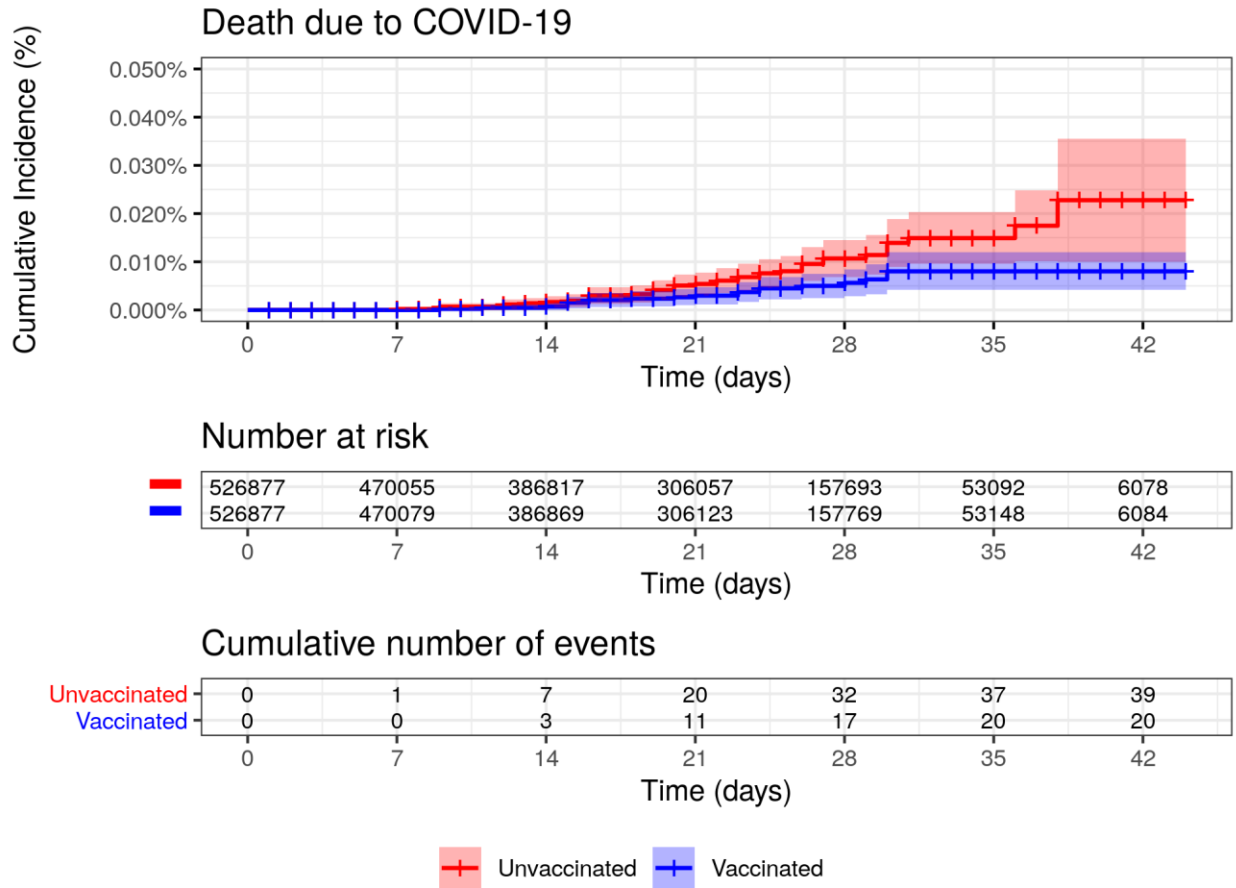

Legend: Cumulative incidence curves (one minus the Kaplan-Meier risk) for the COVID-19 related death outcome when delaying the censoring of vaccinated controls. Shaded areas are 95% confidence intervals. The tables below the curve show the number at risk at each time point and the cumulative number of events. Vaccine effectiveness estimates are included in Table S5.

Figure S8 – Cumulative Incidence Curves for the Main Analysis on the Full Y Axis Scale

A

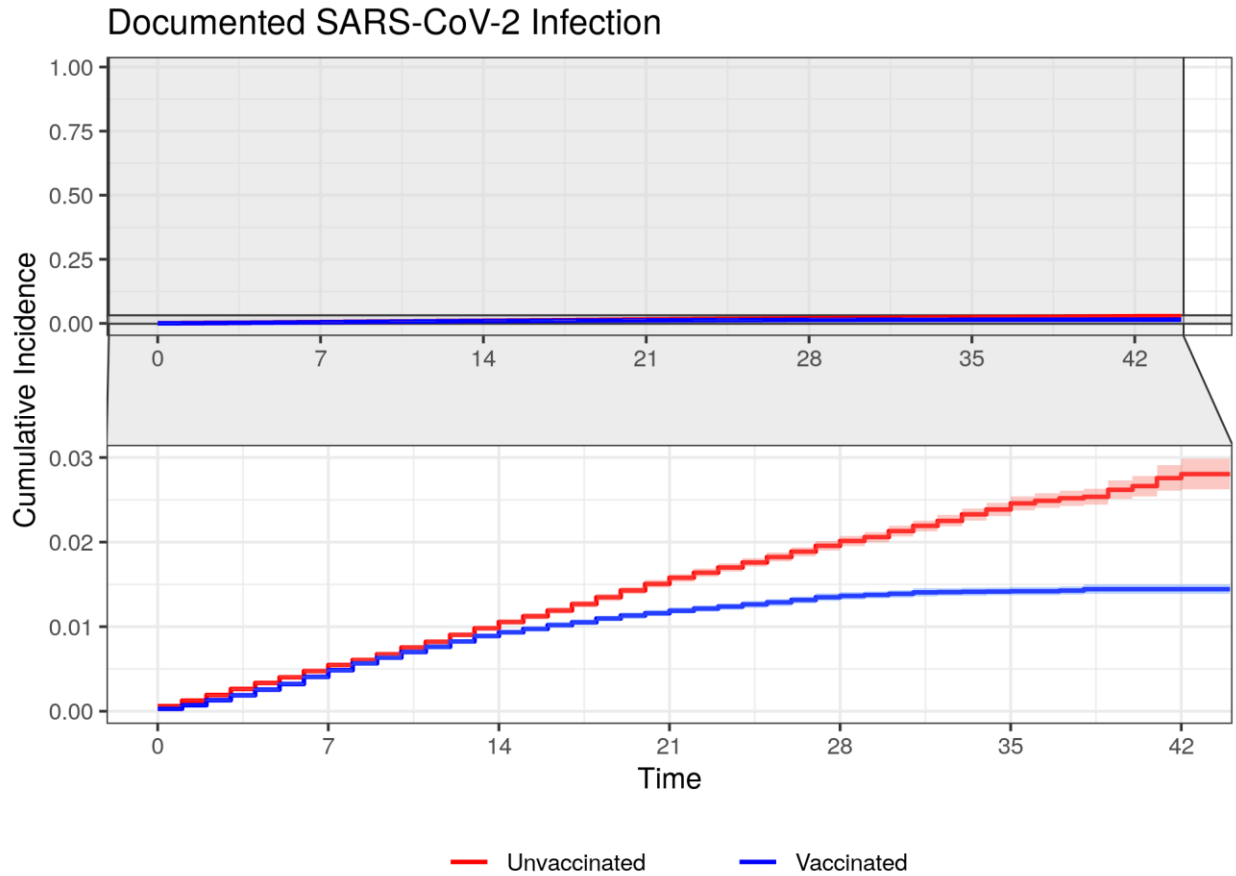

Legend: Cumulative incidence curves (one minus the Kaplan-Meier risk) for the Documented SARS-CoV-2 outcome using the full scale of the Y axis, and magnified on the area of interest (as shown in Figure 2). Shaded areas are 95% confidence intervals.



**B**

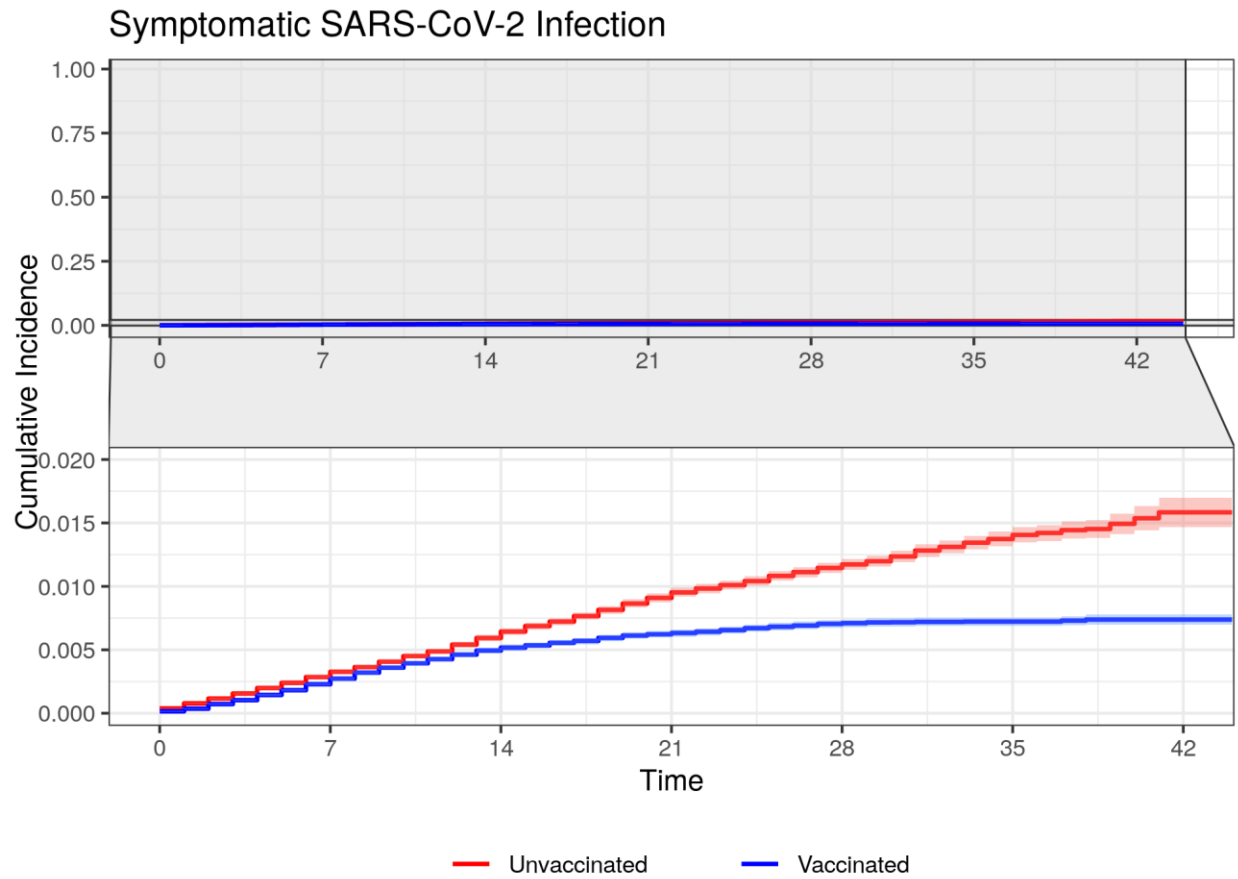

Legend: Cumulative incidence curves (one minus the Kaplan-Meier risk) for the Symptomatic SARS-CoV-2 outcome using the full scale of the Y axis, and magnified on the area of interest (as shown in Figure 2). Shaded areas are 95% confidence intervals.

C

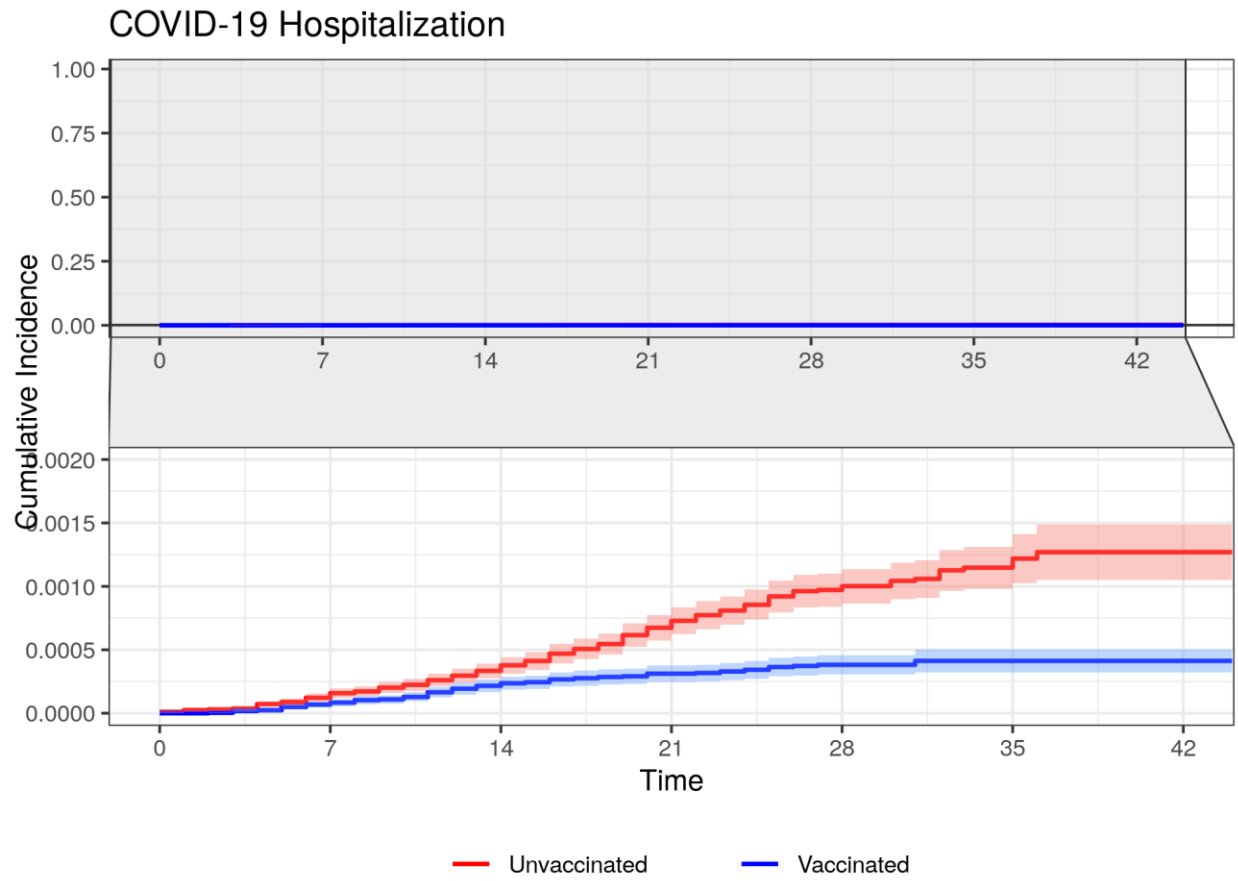

Legend: Cumulative incidence curves (one minus the Kaplan-Meier risk) for the COVID-19 Hospitalization outcome using the full scale of the Y axis, and magnified on the area of interest (as shown in Figure 2). Shaded areas are 95% confidence intervals.

**D**

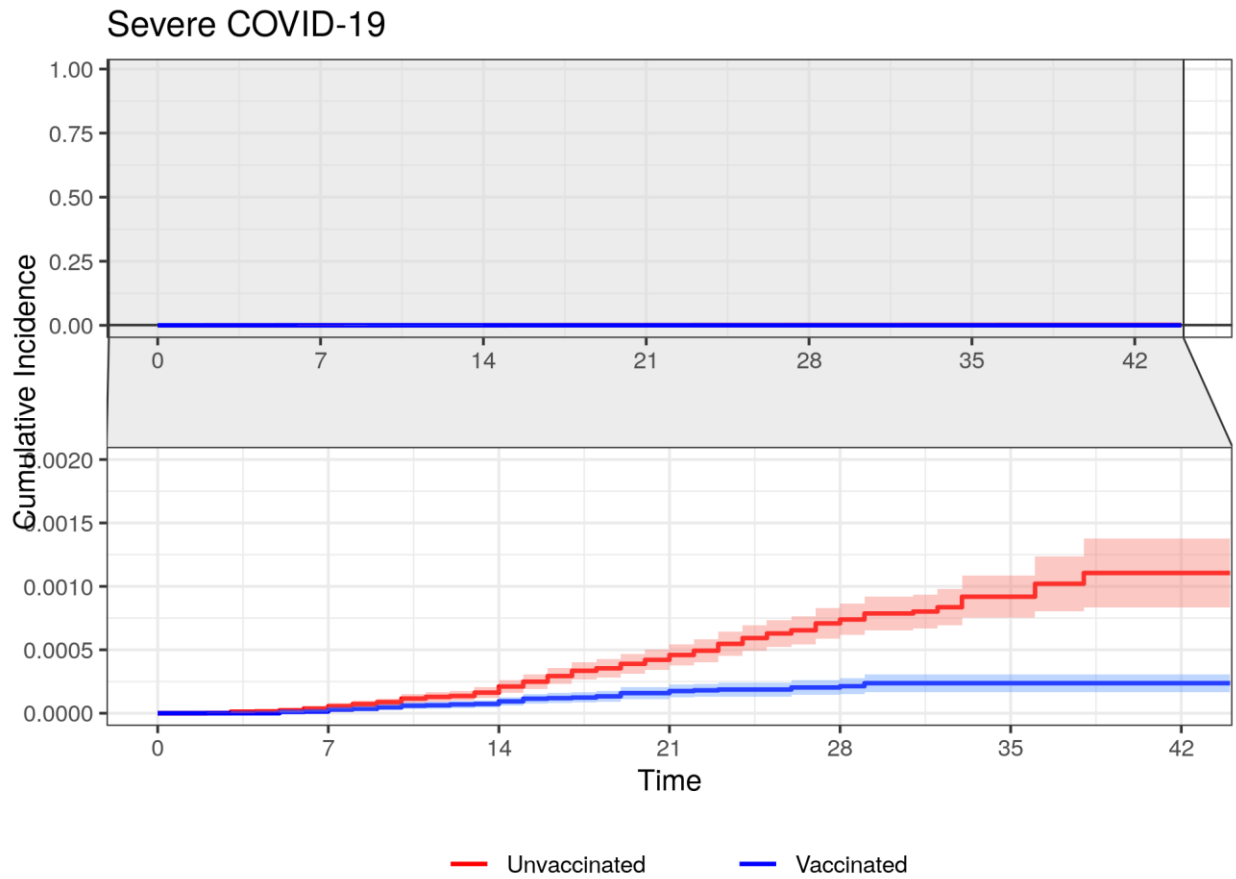

Legend: Cumulative incidence curves (one minus the Kaplan-Meier risk) for the Severe COVID-19 outcome using the full scale of the Y axis, and magnified on the area of interest (as shown in Figure 2). Shaded areas are 95% confidence intervals.

**E**

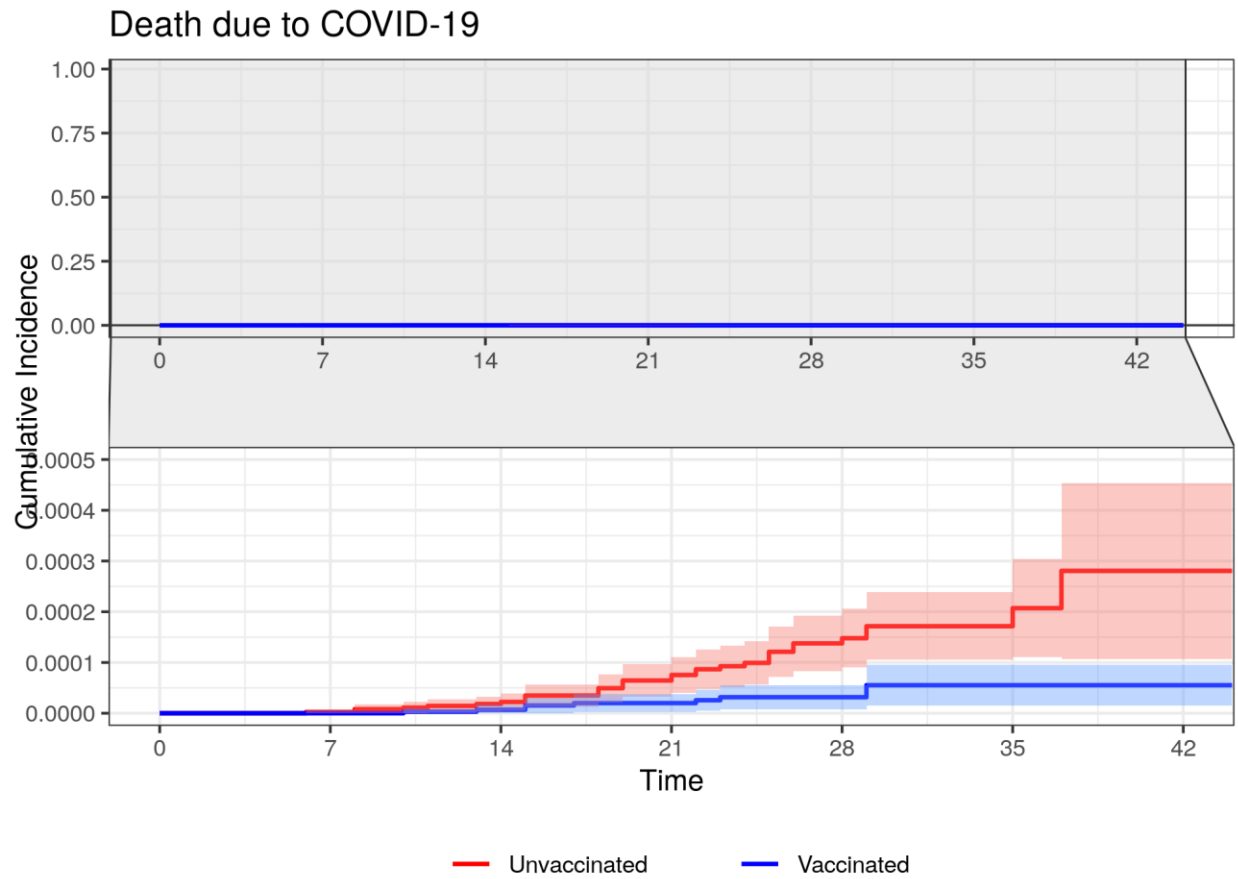

Legend: Cumulative incidence curves (one minus the Kaplan-Meier risk) for the COVID-19 Death outcome using the full scale of the Y axis, and magnified on the area of interest (as shown in Figure 2). Shaded areas are 95% confidence intervals.

Table S1 – Variable Definitions

| Variable                                    | Values | Definitions <sup>1</sup>                                                                                                                                                                                                                                                                                                                                                                                                                                                                                                                                                                                  | Timing <sup>2</sup>                                                                                                                                                                                                                                                |
|---------------------------------------------|--------|-----------------------------------------------------------------------------------------------------------------------------------------------------------------------------------------------------------------------------------------------------------------------------------------------------------------------------------------------------------------------------------------------------------------------------------------------------------------------------------------------------------------------------------------------------------------------------------------------------------|--------------------------------------------------------------------------------------------------------------------------------------------------------------------------------------------------------------------------------------------------------------------|
| <b>Outcomes</b>                             |        |                                                                                                                                                                                                                                                                                                                                                                                                                                                                                                                                                                                                           |                                                                                                                                                                                                                                                                    |
| Documented SARS-CoV-2 Infection             | 0/1    | A PCR confirmed infection.                                                                                                                                                                                                                                                                                                                                                                                                                                                                                                                                                                                | The date of a specimen collection that was found to be positive in a PCR test.<br><br>If the PCR test was done after the beginning of a hospitalization flagged as a COVID-19 hospitalization, the infection date was set to the beginning of the hospitalization. |
| Asymptomatic SARS-CoV-2 Infection           | 0/1    | A PCR-confirmed infection with no report of symptoms during referral and during initial physician questioning.                                                                                                                                                                                                                                                                                                                                                                                                                                                                                            | The date set for the SARS-CoV-2 infection outcome.                                                                                                                                                                                                                 |
| COVID-19 (symptomatic SARS-CoV-2 Infection) | 0/1    | A PCR-confirmed infection with report of symptoms during the PCR referral / during the follow-up in the community setting / COVID-19 related hospitalization / COVID-19 related death.<br><br>Existing symptoms were considered when the physician or nurse checked the "symptomatic" option in the EMR, or when the following specific symptoms were recorded: fever or chills, cough, shortness of breath or difficulty breathing, sore throat, headache, weakness, congestion or runny nose, myalgia, nausea or vomiting, diarrhea, abdominal pain, loss of taste or smell, inability to eat or drink. | The date set for the SARS-CoV-2 infection outcome.                                                                                                                                                                                                                 |
| COVID-19 related hospitalization            | 0/1    | A hospitalization that was reported to the Israeli MOH as a hospitalization of a SARS-CoV-2 infected individual.                                                                                                                                                                                                                                                                                                                                                                                                                                                                                          | The start date of the hospitalization.                                                                                                                                                                                                                             |
| COVID-19 related severe state               | 0/1    | As defined by the hospitalizing institution per the Israeli MOH guidelines, consistent with the                                                                                                                                                                                                                                                                                                                                                                                                                                                                                                           | The first date during the hospitalization in which the individual was flagged as being                                                                                                                                                                             |

|                                         |                |                                                                                                                                                                                                                                                                                                                                                                                                                                                                 |                                |
|-----------------------------------------|----------------|-----------------------------------------------------------------------------------------------------------------------------------------------------------------------------------------------------------------------------------------------------------------------------------------------------------------------------------------------------------------------------------------------------------------------------------------------------------------|--------------------------------|
|                                         |                | NIH criteria for severe illness or critical illness <sup>8</sup> :<br><br>Individuals who have SpO <sub>2</sub> <94% on room air at sea level, a ratio of arterial partial pressure of oxygen to fraction of inspired oxygen (PaO <sub>2</sub> /FiO <sub>2</sub> ) <300 mm Hg, respiratory frequency >30 breaths/min, or lung infiltrates >50%.<br>Critical Illness: Individuals who have respiratory failure, septic shock, and/or multiple organ dysfunction. | in a severe or critical state. |
| COVID-19 related death                  | 0/1            | A death of a SARS-CoV-2 infected individual reported to the Israeli MOH.                                                                                                                                                                                                                                                                                                                                                                                        | The reported date of death.    |
| <b>Vaccination Periods</b>              |                |                                                                                                                                                                                                                                                                                                                                                                                                                                                                 |                                |
| Days 14-20                              | 0/1            | From 14 days and until 20 days after the first dose                                                                                                                                                                                                                                                                                                                                                                                                             | After the index date           |
| Days 21-27                              | 0/1            | From 21 days and until 27 days after the first dose                                                                                                                                                                                                                                                                                                                                                                                                             | After the index date           |
| Days 0-20                               | 0/1            | From the 1st dose and until 20 days later                                                                                                                                                                                                                                                                                                                                                                                                                       | After the index date           |
| Days 0-27                               | 0/1            | From the 1st dose and until 27 days later                                                                                                                                                                                                                                                                                                                                                                                                                       | After the index date           |
| Days 0-6 after the 2 <sup>nd</sup> dose | 0/1            | From the 2nd dose and until 6 days later                                                                                                                                                                                                                                                                                                                                                                                                                        | After the index date           |
| Days 7+ after the 2 <sup>nd</sup> dose  | 0/1            | From day 7 after the 2nd dose and until the end of the follow-up                                                                                                                                                                                                                                                                                                                                                                                                | After the index date           |
| <b>Covariates</b>                       |                |                                                                                                                                                                                                                                                                                                                                                                                                                                                                 |                                |
| Age                                     | Integer        | Age in complete years                                                                                                                                                                                                                                                                                                                                                                                                                                           | Current                        |
| Sex                                     | Male/Female    | As defined in CHS' files                                                                                                                                                                                                                                                                                                                                                                                                                                        | Current                        |
| Place of Residence                      | List of places | Geo-statistical area in which the patient resides per CHS' files                                                                                                                                                                                                                                                                                                                                                                                                | Current                        |
| Health-care worker                      | 0/1            | Is patient a health-care worker per CHS' files                                                                                                                                                                                                                                                                                                                                                                                                                  | Current                        |
| Long-term care facility resident        | 0/1            | Is patient a long-term care facility resident per CHS' files                                                                                                                                                                                                                                                                                                                                                                                                    | Current                        |
| Confined to Home                        | 0/1            | Is patient confined to his home per CHS' files                                                                                                                                                                                                                                                                                                                                                                                                                  | Current                        |
| Influenza vaccinations                  | 0/1            | Did patient receive an influenza vaccine in the last 5 years                                                                                                                                                                                                                                                                                                                                                                                                    | Last 5 Years                   |
| Cancer                                  | 0/1            | ICD9 Code 174*<br>ICD9 Code 175*<br>ICD9 Code 233.0<br>ICD9 Code V10.3<br>ICD9 Proc Code 85.4*<br>ICD9 Code 153*<br>ICD9 Code 154*                                                                                                                                                                                                                                                                                                                              | Last 5 years                   |

|  |  |                                                                                                                                                                                                                                                                                                                                                                                                                                                                                                                                                                                                                                                                                                                                                                                                                                                                                                                                                                                          |  |
|--|--|------------------------------------------------------------------------------------------------------------------------------------------------------------------------------------------------------------------------------------------------------------------------------------------------------------------------------------------------------------------------------------------------------------------------------------------------------------------------------------------------------------------------------------------------------------------------------------------------------------------------------------------------------------------------------------------------------------------------------------------------------------------------------------------------------------------------------------------------------------------------------------------------------------------------------------------------------------------------------------------|--|
|  |  | ICD9 Code V10.5*<br>ICD9 Code V10.6*<br>ICD9 Code 185<br>ICD9 Code V10.46<br>ICD9 Code 162*<br>ICD9 Code V10.1*<br>ICD9 Code 188*<br>ICD9 Code V10.51<br>ICD9 Code 183*<br>ICD9 Code V10.43<br>ICD9 Code 179<br>ICD9 Code 182*<br>ICD9 Code V10.42<br>ICD9 Code 157*<br>ICD9 Code 191*<br>ICD9 Code 192*<br>ICD9 Code V10.85<br>ICD9 Code 151*<br>ICD9 Code V10.04<br>ICD9 Code 172*<br>ICD9 Code V10.82<br>ICD9 Code 201*<br>ICD9 Code 200*<br>ICD9 Code 202.4*<br>ICD9 Code 204*<br>ICD9 Code 205*<br>ICD9 Code 206*<br>ICD9 Code 207.1*<br>ICD9 Code 208.1*<br>ICD9 Code 189*<br>ICD9 Code V10.52<br>ICD9 Code 160*<br>ICD9 Code 161*<br>ICD9 Code 164.0<br>ICD9 Code 195.0<br>ICD9 Code V10.21<br>ICD9 Code V10.22<br>ICD9 Code 180*<br>ICD9 Code V10.41<br>ICD9 Code 140*<br>ICD9 Code 141*<br>ICD9 Code 142*<br>ICD9 Code 143*<br>ICD9 Code 144*<br>ICD9 Code 145*<br>ICD9 Code 150*<br>ICD9 Code V10.03<br>ICD9 Code 155*<br>ICD9 Code 156*<br>ICD9 Code V10.07<br>ICD9 Code 170* |  |
|--|--|------------------------------------------------------------------------------------------------------------------------------------------------------------------------------------------------------------------------------------------------------------------------------------------------------------------------------------------------------------------------------------------------------------------------------------------------------------------------------------------------------------------------------------------------------------------------------------------------------------------------------------------------------------------------------------------------------------------------------------------------------------------------------------------------------------------------------------------------------------------------------------------------------------------------------------------------------------------------------------------|--|

|                                       |     |                                                                                                                                                                                                                                                                                                                                                                                                                                                    |      |
|---------------------------------------|-----|----------------------------------------------------------------------------------------------------------------------------------------------------------------------------------------------------------------------------------------------------------------------------------------------------------------------------------------------------------------------------------------------------------------------------------------------------|------|
|                                       |     | ICD9 Code V10.81<br>ICD9 Code 193<br>ICD9 Code V10.87<br>ICD9 Code 171*<br>ICD9 Code 176*<br>ICD9 Code 184*<br>ICD9 Code 186*<br>ICD9 Code 187*<br>ICD9 Code V10.4*<br>ICD9 Code 203*<br>ICD9 Code 273.3<br>ICD9 Code 152*<br>ICD9 Code 158*<br>ICD9 Code 159*<br>ICD9 Code 163*<br>ICD9 Code 164*<br>ICD9 Code 165*<br>ICD9 Code 181<br>ICD9 Code 190*<br>ICD9 Code 192.8<br>ICD9 Code 196*<br>ICD9 Code 197*<br>ICD9 Code 198*<br>ICD9 Code 199* |      |
| Chronic Kidney Disease                | 0/1 | ICD Proc Code 39.95<br>ICD Proc Code 54.98<br>ICD9 Code 996.81<br>ICD9 Code V42.0<br>ICD Proc Code 55.6*<br>ICD9 Code 403._1<br>ICD9 Code 404._2<br>ICD9 Code 404._3<br>ICD9 Code 585*<br>ICD9 Code 586<br>ICD9 Code 250.4*<br>ICD9 Code 274.1*<br>ICD9 Code 440.1<br>ICD9 Code 581*<br>ICD9 Code 582*<br>ICD9 Code 583*<br>ICD9 Code 587<br>ICD9 Code 588*<br>ICD9 Code 589*                                                                      | Ever |
| Chronic Obstructive Pulmonary Disease | 0/1 | ICD9 Code 491*<br>ICD9 Code 492*<br>ICD9 Code 496                                                                                                                                                                                                                                                                                                                                                                                                  | Ever |
| Heart Conditions                      | 0/1 | ICD9 Code 410*<br>ICD9 Code 411*<br>ICD9 Code 412<br>ICD9 Code 413*<br>ICD9 Code 414*                                                                                                                                                                                                                                                                                                                                                              | Ever |



|                                  |     |                                                                                                                                                                                                                                                                                |                                                                               |
|----------------------------------|-----|--------------------------------------------------------------------------------------------------------------------------------------------------------------------------------------------------------------------------------------------------------------------------------|-------------------------------------------------------------------------------|
|                                  |     | ICD9 Code 429.2, 429.7*<br>ICD9 Code V45.81, V45.82<br>ICD9 Proc Code 36.0*<br>ICD9 Proc Code 36.1*<br>ICD9 Code 428*<br>ICD9 Code 398.91<br>ICD9 Code 402._1<br>ICD9 Code 404._1, ICD9 Code<br>404._3<br>ICD9 Code 416.9<br>ICD9 Code 514<br>ICD9 Code 425*<br>ICD9 Code 416* |                                                                               |
| Solid Organ Transplant Recipient | 0/1 | ICD9 Code 996.81<br>ICD9 Code V42.0<br>ICD Proc Code 55.6*<br>ICD9 Code V42.7<br>ICD Proc Code 50.5*<br>ICD9 Code V42.1<br>ICD9 Code V43.2<br>ICD Proc Code 37.5<br>ICD9 Code V42.83<br>ICD Proc Code 52.8*<br>ICD9 Code V42.6<br>ICD Proc Code 33.5*<br>ICD Proc Code 33.6    | Ever                                                                          |
| Obesity                          | 0/1 | Body Mass Index (BMI) 30-40                                                                                                                                                                                                                                                    | Latest measurement in last 5 years not taken during pregnancy                 |
| Severe Obesity                   | 0/1 | Body Mass Index (BMI) 40+                                                                                                                                                                                                                                                      | Latest measurement in last 5 years not taken during pregnancy                 |
| Pregnancy                        | 0/1 | Internal Clalit Registry                                                                                                                                                                                                                                                       | Current                                                                       |
| Sickle Cell Disease              | 0/1 | ICD9 Code 282.6*                                                                                                                                                                                                                                                               | Ever                                                                          |
| Smoking                          | 0/1 | Internal Clalit Registry                                                                                                                                                                                                                                                       | Last recorded value                                                           |
| Type 2 Diabetes Mellitus         | 0/1 | HbA1C > 6.5<br>ATC Codes A10[A,B]<br>ICD9 Code 250*<br>ICD9 Code 357.2<br>ICD9 Code 362.0*<br><br><b>And not:</b><br>ICD9 Code 250._1, 250._3                                                                                                                                  | For diagnosis codes, Ever<br>For drugs, 4 or more dispensed in last 12 months |
| Asthma                           | 0/1 | ICD9 Code 493*                                                                                                                                                                                                                                                                 | Ever                                                                          |
| Cerebrovascular Disease          | 0/1 | ICD9 Code 362.34<br>ICD9 Code 430<br>ICD9 Code 431<br>ICD9 Code 432*<br>ICD9 Code 433*                                                                                                                                                                                         | Ever                                                                          |

|                           |     |                                                                                                                                                                                                                                                                                                                                                                                                                                                       |                                                                               |
|---------------------------|-----|-------------------------------------------------------------------------------------------------------------------------------------------------------------------------------------------------------------------------------------------------------------------------------------------------------------------------------------------------------------------------------------------------------------------------------------------------------|-------------------------------------------------------------------------------|
|                           |     | ICD9 Code 434*<br>ICD9 Code 435*<br>ICD9 Code 436*<br>ICD9 Code 438*                                                                                                                                                                                                                                                                                                                                                                                  |                                                                               |
| Other Respiratory Disease | 0/1 | ICD9 Code 277.0*<br>ICD9 Code 494*<br>ICD9 Code 515                                                                                                                                                                                                                                                                                                                                                                                                   | Ever                                                                          |
| Hypertension              | 0/1 | ICD9 Code 401*<br>ICD9 Code 402*<br>ICD9 Code 403*<br>ICD9 Code 404*<br>ICD9 Code 405*                                                                                                                                                                                                                                                                                                                                                                | Ever                                                                          |
| Immunocompromised State   | 0/1 | <b>Any of:</b><br>ICD9 Code 042*<br>ICD9 Code 043*<br>ICD9 Code 044*<br>ICD9 Code 795.71<br>ICD9 Code V08<br>ICD9 Code V42.8*<br>ICD9 Proc Code 41.0*<br><br><b>Or at least 2 of:</b><br>ATC4 Code H02AB<br>ATC4 Code H02BX<br>ATC4 Code M01BA<br><br><b>Or at least 2 of:</b><br>ATC2 Code L04                                                                                                                                                       | For diagnosis codes, Ever<br>For drugs, 4 or more dispensed in last 12 months |
| Neurologic Conditions     | 0/1 | ICD9 Code 290.*<br>ICD9 Code 294*<br>ICD9 Code 310.1<br>ICD9 Code 331*<br>ATC Codes N06DA02, N06DA03<br>ICD9 Code 358*<br>ICD9 Code 332.[0,1]<br>ICD9 Code 345*<br>ICD9 Code 340<br>ATC Codes L03AB07, L03AB08, L04AA07<br>ICD9 Code 343*<br>ICD9 Code 333.4<br>ICD9 Code 334*<br>ICD9 Code 356*<br>ICD9 Code 138<br>ICD9 Code 335*<br>ICD9 Code 730.7*<br>ICD9 V12.02<br>ICD9 Code 228.02<br>ICD9 Code 307.23<br>ICD9 Code 330.9<br>ICD9 Code 331.3* | For diagnosis codes, Ever<br>For drugs, 4 or more dispensed in last 12 months |

|                                                                         |         |                                                                                                                                                                                                                                                                                                                                                                                                                                      |                                                               |
|-------------------------------------------------------------------------|---------|--------------------------------------------------------------------------------------------------------------------------------------------------------------------------------------------------------------------------------------------------------------------------------------------------------------------------------------------------------------------------------------------------------------------------------------|---------------------------------------------------------------|
|                                                                         |         | ICD9 Code 331.4<br>ICD9 Code 333*<br>ICD9 Code 334*<br>ICD9 Code 336*<br>ICD9 Code 337<br>ICD9 Code 335.1*<br>ICD9 Code 359.0<br>ICD9 Code 359.21<br>ICD9 Code 357.0<br>ICD9 Code 237.7*<br>ICD9 Code 742.8[1,2]                                                                                                                                                                                                                     |                                                               |
| Liver Disease                                                           | 0/1     | ICD9 Code 070.22<br>ICD9 Code 070.23<br>ICD9 Code 070.32<br>ICD9 Code 070.33<br>ICD9 Code 070.44<br>ICD9 Code 070.54<br>ICD9 Code V02.61<br>ICD9 Code V02.62<br>ICD9 Code 571*<br>ICD9 Code 275.1<br>ICD9 Code 277.4<br>ICD9 Code 452<br>ICD9 Code 453.0<br>ICD9 Code 571.8<br>ICD9 Code 571.9<br>ICD9 Code 572*                                                                                                                     | Ever                                                          |
| Overweight                                                              | 0/1     | Body Mass Index (BMI) 25-30                                                                                                                                                                                                                                                                                                                                                                                                          | Latest measurement in last 5 years not taken during pregnancy |
| Thalassemia                                                             | 0/1     | ICD9 Code 282.4*                                                                                                                                                                                                                                                                                                                                                                                                                     | Ever                                                          |
| Type 1 Diabetes Mellitus                                                | 0/1     | ICD9 Code 250._1, 250._3                                                                                                                                                                                                                                                                                                                                                                                                             | Ever                                                          |
| Count of pre-existing conditions considered by the CDC as risk criteria | Integer | Summation of 1 point for each of the following: <ul style="list-style-type: none"> <li>• Cancer</li> <li>• CKD</li> <li>• Heart Disease</li> <li>• Sickle Cell Disease</li> <li>• Asthma</li> <li>• Cerebrovascular Disease</li> <li>• Hypertension</li> <li>• Neurological Disease</li> <li>• Liver Disease</li> <li>• Thalassemia</li> <li>• COPD or other respiratory disease</li> <li>• Type 1 or 2 Diabetes Mellitus</li> </ul> | Based on the variables above                                  |

|  |  |                                                                                                                                               |  |
|--|--|-----------------------------------------------------------------------------------------------------------------------------------------------|--|
|  |  | <ul style="list-style-type: none"> <li>• Solid organ transplant recipient or immunodeficiency</li> <li>• Obesity or severe obesity</li> </ul> |  |
|--|--|-----------------------------------------------------------------------------------------------------------------------------------------------|--|

Abbreviations: COVID-19, Corona virus disease 2019; TND, Test-Negative Design; MOH, Ministry of Health; CHS, Clalit Health Services; ICD, International Classification of Disease; ATC, Anatomic therapeutic chemical; NDC, National drug code.

<sup>1</sup>Additional confirmation of the diagnostic codes was done by checking the matching of the free text within the diagnosis description field.

<sup>2</sup> Covariates were extracted at the beginning of the calendar month in which the index date occurred.

Legend: Names, potential values, definitions and time periods for all variables used in the study. Variables were defined using internal CHS registries, ICD9 codes and ATC codes.

## Table S2 – Vaccinated Individuals: Total, Eligible and Matched

| Variable                              | Full<br>N = 1,503,216 | Eligible<br>N = 1,163,534 | Matched<br>N = 596,618 |
|---------------------------------------|-----------------------|---------------------------|------------------------|
| <b>Basic Demographics</b>             |                       |                           |                        |
| Age Groups                            |                       |                           |                        |
| 16-39                                 | 366,453 (24%)         | 289,306 (25%)             | 213,090 (36%)          |
| 40-49                                 | 260,102 (17%)         | 208,784 (18%)             | 130,752 (22%)          |
| 50-59                                 | 226,385 (15%)         | 177,131 (15%)             | 85,609 (14%)           |
| 60-69                                 | 294,328 (20%)         | 228,424 (20%)             | 88,153 (15%)           |
| 70-79                                 | 223,227 (15%)         | 169,991 (15%)             | 56,946 (9.5%)          |
| 80+                                   | 132,721 (8.8%)        | 89,898 (7.7%)             | 22,068 (3.7%)          |
| Sex                                   |                       |                           |                        |
| F                                     | 772,597 (51%)         | 585,369 (50%)             | 298,059 (50%)          |
| M                                     | 730,587 (49%)         | 578,165 (50%)             | 298,559 (50%)          |
| <b>CDC Risk Factor Count</b>          |                       |                           |                        |
| 0                                     | 631,229 (42%)         | 506,635 (44%)             | 338,384 (57%)          |
| 1                                     | 370,888 (25%)         | 292,520 (25%)             | 140,779 (24%)          |
| 2                                     | 216,821 (14%)         | 165,081 (14%)             | 55,766 (9.3%)          |
| 3                                     | 139,046 (9.2%)        | 101,784 (8.7%)            | 29,273 (4.9%)          |
| 4+                                    | 145,232 (9.7%)        | 97,514 (8.4%)             | 32,416 (5.4%)          |
| <b>CDC “Certain” Risk Criteria</b>    |                       |                           |                        |
| Cancer                                | 51,054 (3.4%)         | 34,892 (3.0%)             | 11,595 (1.9%)          |
| Chronic Kidney Disease                | 159,296 (11%)         | 114,564 (9.8%)            | 40,587 (6.8%)          |
| Chronic Obstructive Pulmonary Disease | 48,994 (3.3%)         | 34,321 (2.9%)             | 11,131 (1.9%)          |
| Heart Disease                         | 168,810 (11%)         | 119,111 (10%)             | 38,913 (6.5%)          |
| Solid Organ Transplant                | 2,804 (0.2%)          | 1,789 (0.2%)              | 435 (<0.1%)            |
| Obesity (BMI 30-40)                   | 327,237 (22%)         | 250,697 (22%)             | 105,476 (18%)          |
| Obesity (BMI 40+)                     | 29,394 (2.0%)         | 21,932 (1.9%)             | 8,920 (1.5%)           |
| Pregnancy                             | 8,179 (0.5%)          | 5,236 (0.5%)              | 1,508 (0.3%)           |
| Sickle Cell Disease                   | 264 (<0.1%)           | 203 (<0.1%)               | 109 (<0.1%)            |
| Smoking                               | 224,144 (15%)         | 179,335 (15%)             | 97,881 (16%)           |
| Type 2 Diabetes                       | 261,246 (17%)         | 190,914 (16%)             | 65,343 (11%)           |
| <b>CDC “Possible” Risk Criteria</b>   |                       |                           |                        |
| Asthma                                | 106,627 (7.1%)        | 80,411 (6.9%)             | 29,814 (5.0%)          |
| Cerebrovascular Disease               | 81,354 (5.4%)         | 55,599 (4.8%)             | 17,792 (3.0%)          |
| Other Respiratory Disease             | 8,926 (0.6%)          | 6,304 (0.5%)              | 2,014 (0.3%)           |
| Hypertension                          | 422,586 (28%)         | 309,112 (27%)             | 103,028 (17%)          |
| Immunosuppression                     | 67,492 (4.5%)         | 45,688 (3.9%)             | 16,180 (2.7%)          |
| Neurological Disease                  | 111,084 (7.4%)        | 74,792 (6.4%)             | 24,111 (4.0%)          |
| Liver Disease                         | 37,286 (2.5%)         | 26,963 (2.3%)             | 9,699 (1.6%)           |
| Obesity (BMI 25-30)                   | 541,780 (36%)         | 423,347 (36%)             | 212,778 (36%)          |

| Variable        | Full<br>N = 1,503,216 | Eligible<br>N = 1,163,534 | Matched<br>N = 596,618 |
|-----------------|-----------------------|---------------------------|------------------------|
| Thalassemia     | 9,827 (0.7%)          | 7,616 (0.7%)              | 3,967 (0.7%)           |
| Type 1 Diabetes | 10,885 (0.7%)         | 7,613 (0.7%)              | 2,406 (0.4%)           |

Legend: Comparison of the characteristics of the entire CHS vaccinated population, the vaccinated population that was eligible for the study per the inclusion and exclusion criteria and the vaccinated population that was eventually used as the exposed group in the study following the matching process.

Abbreviations: CDC, Centers for disease control and prevention; BMI, Body mass index;

**Table S3 – Vaccine Effectiveness for Asymptomatic Infection Proxy**

| <b>Period</b>            | <b>Asymptomatic Infection Proxy</b> |                  |
|--------------------------|-------------------------------------|------------------|
|                          | <b>1-RR</b>                         | <b>RD</b>        |
| 14 - 20                  | 29% (17%-39%)                       | 0.51 (0.27-0.75) |
| 21 - 27                  | 52% (41%-60%)                       | 0.93 (0.68-1.16) |
| 0 - 20                   | 8% (1%-14%)                         | 0.44 (0.07-0.80) |
| 0 - 27                   | 19% (13%-24%)                       | 1.49 (0.99-1.95) |
| 0 – end of follow-up     | 42% (34%-49%)                       | 5.08 (3.78-6.72) |
| 2nd - 2nd+6              | 59% (48%-69%)                       | 1.06 (0.80-1.36) |
| 2nd+7 - end of follow-up | 90% (83%-94%)                       | 3.82 (2.46-5.45) |

Legend: Estimates and 95% confidence intervals for one minus the risk ratio and the risk difference per 1,000 patients for the asymptomatic infection outcome over different time periods for different populations. Confidence intervals were estimated using the percentile bootstrap method with 500 repetitions. Estimates were only calculated for cells with more than 10 outcomes across both groups. The cumulative incidence curve is included in Figure S5.

Abbreviations: RR, Risk ratio; RD: Risk difference.

Table S4 – Vaccine Effectiveness Estimates for Additional Periods

| Period               | Documented Infection |                        | Symptomatic Infection |                     | Hospitalization  |                     | Severe Disease    |                     | Death            |                     |
|----------------------|----------------------|------------------------|-----------------------|---------------------|------------------|---------------------|-------------------|---------------------|------------------|---------------------|
|                      | 1-RR                 | RD                     | 1-RR                  | RD                  | 1-RR             | RD                  | 1-RR              | RD                  | 1-RR             | RD                  |
| 0 - 20               | 21%<br>(17%-24%)     | 2.96<br>(2.43-3.51)    | 29%<br>(25%-33%)      | 2.52<br>(2.14-2.92) | 53%<br>(38%-62%) | 0.33<br>(0.21-0.43) | 59%<br>(42%-72%)  | 0.23<br>(0.14-0.32) | 69%<br>(24%-93%) | 0.04<br>(0.01-0.08) |
| 0 - 27               | 30%<br>(27%-34%)     | 5.71<br>(5.05-6.50)    | 38%<br>(34%-41%)      | 4.21<br>(3.70-4.73) | 61%<br>(51%-69%) | 0.59<br>(0.44-0.73) | 69%<br>(57%-79%)  | 0.45<br>(0.33-0.58) | 77%<br>(51%-93%) | 0.11<br>(0.05-0.17) |
| 0 - End of follow-up | 49%<br>(45%-53%)     | 13.61<br>(11.78-15.65) | 53%<br>(49%-57%)      | 8.46<br>(7.34-9.69) | 68%<br>(57%-75%) | 0.86<br>(0.62-1.10) | 79%<br>(69%-86%)  | 0.87<br>(0.61-1.14) | 80%<br>(49%-94%) | 0.23<br>(0.08-0.41) |
| 2nd-2nd+6            | 70%<br>(64%-75%)     | 2.73<br>(2.34-3.12)    | 77%<br>(71%-83%)      | 1.61<br>(1.33-1.88) | 88%<br>(73%-98%) | 0.25<br>(0.16-0.36) | 96%<br>(86%-100%) | 0.24<br>(0.16-0.32) | 100%*            | 0.08<br>(0.03-0.12) |

\*No events were recorded in the vaccinated group, precluding estimation of the confidence interval.

Legend: Estimates and 95% confidence intervals for one minus the risk ratio and the risk difference per 1,000 patients for different outcomes over different time periods for different populations. Confidence intervals were estimated using the percentile bootstrap method with 500 repetitions. Estimates were only calculated for cells with more than 10 outcomes across both groups.

Abbreviations: RR, Risk ratio; RD, Risk difference.



**Table S5 – Risk Ratios and Risk Differences for the Sensitivity Analysis when Delaying Censoring of Vaccinated Controls**

| Period                                                    | Documented Infection |                      | Symptomatic Infection |                     | Hospitalization   |                     | Severe Disease    |                     | Death             |                      |
|-----------------------------------------------------------|----------------------|----------------------|-----------------------|---------------------|-------------------|---------------------|-------------------|---------------------|-------------------|----------------------|
|                                                           | 1-RR<br>(95-CI)      | RD<br>(95-CI)        | 1-RR<br>(95-CI)       | RD<br>(95-CI)       | 1-RR<br>(95-CI)   | RD<br>(95-CI)       | 1-RR<br>(95-CI)   | RD<br>(95-CI)       | 1-RR<br>(95-CI)   | RD<br>(95-CI)        |
| Days 14-20<br>after 1 <sup>st</sup> dose                  | 43%<br>(38%-49%)     | 1.87<br>(1.56-2.18)  | 54%<br>(48%-60%)      | 1.40<br>(1.18-1.66) | 64%<br>(44%-77%)  | 0.18<br>(0.11-0.26) | 46%<br>(23%-67%)  | 0.09<br>(0.04-0.16) | 44%<br>(-36%-83%) | 0.01<br>(-0.01-0.04) |
| Days 21-27<br>after 1 <sup>st</sup> dose                  | 60%<br>(54%-66%)     | 2.30<br>(1.96-2.61)  | 65%<br>(58%-71%)      | 1.32<br>(1.09-1.57) | 79%<br>(59%-91%)  | 0.21<br>(0.13-0.29) | 77%<br>(54%-91%)  | 0.14<br>(0.08-0.20) | 62%<br>(-5%-91%)  | 0.03<br>(-0.00-0.07) |
| Day 7 after 2 <sup>nd</sup><br>dose - end of<br>follow-up | 92%<br>(87%-95%)     | 8.12<br>(6.42-10.01) | 95%<br>(89%-99%)      | 4.43<br>(3.23-6.03) | 89%<br>(60%-100%) | 0.23<br>(0.10-0.38) | 92%<br>(70%-100%) | 0.24<br>(0.09-0.42) | NA                | NA                   |

Legend: Estimates and 95% confidence intervals for one minus the risk ratio and the risk difference per 1,000 patients for different outcomes over different time periods for the entire study population in the analysis delaying censoring of vaccinated controls. This analysis does not allow vaccinated controls to re-enroll as exposed, so individuals do not contribute time to both study groups. Confidence intervals were estimated using the percentile bootstrap method with 500 repetitions. Estimates were only calculated for cells with more than 10 outcomes across both groups. Cumulative incidence curves are included in Figure S7.

Abbreviations: RR: Risk ratio; RD: Risk difference; NA: Not available.

Table S6 – Full Analysis Results

| Period                                | Documented Infection |                        | Symptomatic Infection |                     | Hospitalization   |                      | Severe Disease    |                     | Death              |                      |
|---------------------------------------|----------------------|------------------------|-----------------------|---------------------|-------------------|----------------------|-------------------|---------------------|--------------------|----------------------|
|                                       | 1-RR                 | RD                     | 1-RR                  | RD                  | 1-RR              | RD                   | 1-RR              | RD                  | 1-RR               | RD                   |
| <b>Full</b>                           |                      |                        |                       |                     |                   |                      |                   |                     |                    |                      |
| 0 - 20                                | 21%<br>(17%-24%)     | 2.96<br>(2.43-3.51)    | 29%<br>(25%-33%)      | 2.52<br>(2.14-2.92) | 53%<br>(38%-62%)  | 0.33<br>(0.21-0.43)  | 59%<br>(42%-72%)  | 0.23<br>(0.14-0.32) | 69%<br>(24%-93%)   | 0.04<br>(0.01-0.08)  |
| 0 - 27                                | 30%<br>(27%-34%)     | 5.71<br>(5.05-6.50)    | 38%<br>(34%-41%)      | 4.21<br>(3.70-4.73) | 61%<br>(51%-69%)  | 0.59<br>(0.44-0.73)  | 69%<br>(57%-79%)  | 0.45<br>(0.33-0.58) | 77%<br>(51%-93%)   | 0.11<br>(0.05-0.17)  |
| 0 - End of follow-up                  | 49%<br>(45%-53%)     | 13.61<br>(11.78-15.65) | 53%<br>(49%-57%)      | 8.46<br>(7.34-9.69) | 68%<br>(57%-75%)  | 0.86<br>(0.62-1.10)  | 79%<br>(69%-86%)  | 0.87<br>(0.61-1.14) | 80%<br>(49%-94%)   | 0.23<br>(0.08-0.41)  |
| 14 - 20                               | 46%<br>(40%-51%)     | 2.06<br>(1.70-2.40)    | 57%<br>(50%-63%)      | 1.54<br>(1.28-1.80) | 74%<br>(56%-86%)  | 0.21<br>(0.13-0.29)  | 62%<br>(39%-80%)  | 0.14<br>(0.07-0.21) | 72%<br>(19%-100%)  | 0.03<br>(0.01-0.07)  |
| 21 - 27                               | 60%<br>(53%-66%)     | 2.31<br>(1.96-2.69)    | 66%<br>(57%-73%)      | 1.34<br>(1.09-1.62) | 78%<br>(61%-91%)  | 0.22<br>(0.13-0.31)  | 80%<br>(59%-94%)  | 0.18<br>(0.10-0.27) | 84%<br>(44%-100%)  | 0.06<br>(0.02-0.11)  |
| 2 <sup>nd</sup> - 2 <sup>nd</sup> +6  | 70%<br>(64%-75%)     | 2.73<br>(2.34-3.12)    | 77%<br>(71%-83%)      | 1.61<br>(1.33-1.88) | 88%<br>(73%-98%)  | 0.25<br>(0.16-0.36)  | 96%<br>(86%-100%) | 0.24<br>(0.16-0.32) | 100%*              | 0.08<br>(0.03-0.12)  |
| 2 <sup>nd</sup> +7 - end of follow-up | 92%<br>(88%-95%)     | 8.58<br>(6.22-11.18)   | 94%<br>(87%-98%)      | 4.61<br>(3.29-6.53) | 87%<br>(55%-100%) | 0.22<br>(0.08-0.39)  | 92%<br>(75%-100%) | 0.32<br>(0.13-0.52) | NA                 | NA                   |
| <b>Males</b>                          |                      |                        |                       |                     |                   |                      |                   |                     |                    |                      |
| 0 - 20                                | 15%<br>(10%-21%)     | 2.08<br>(1.31-2.90)    | 23%<br>(16%-30%)      | 1.79<br>(1.20-2.35) | 44%<br>(21%-60%)  | 0.28<br>(0.12-0.44)  | 55%<br>(29%-74%)  | 0.24<br>(0.10-0.38) | 71%<br>(-6%-100%)  | 0.06<br>(-0.00-0.12) |
| 0 - 27                                | 27%<br>(23%-32%)     | 4.99<br>(4.06-5.96)    | 34%<br>(29%-39%)      | 3.49<br>(2.83-4.23) | 49%<br>(33%-63%)  | 0.46<br>(0.27-0.68)  | 66%<br>(49%-78%)  | 0.46<br>(0.29-0.61) | 78%<br>(41%-97%)   | 0.13<br>(0.04-0.21)  |
| 0 - End of follow-up                  | 44%<br>(38%-50%)     | 11.78<br>(9.39-14.52)  | 46%<br>(40%-52%)      | 6.31<br>(5.14-7.63) | 60%<br>(43%-72%)  | 0.82<br>(0.47-1.24)  | 75%<br>(59%-85%)  | 0.93<br>(0.56-1.43) | 85%<br>(52%-98%)   | 0.35<br>(0.08-0.81)  |
| 14 - 20                               | 41%<br>(32%-50%)     | 1.71<br>(1.22-2.21)    | 52%<br>(41%-61%)      | 1.26<br>(0.90-1.62) | 71%<br>(40%-90%)  | 0.18<br>(0.07-0.27)  | 66%<br>(38%-86%)  | 0.17<br>(0.07-0.27) | 73%<br>(-21%-100%) | 0.05<br>(-0.01-0.11) |
| 21 - 27                               | 57%<br>(48%-65%)     | 2.25<br>(1.76-2.75)    | 62%<br>(49%-72%)      | 1.30<br>(0.92-1.67) | 50%<br>(-12%-82%) | 0.11<br>(-0.02-0.24) | 82%<br>(55%-100%) | 0.18<br>(0.08-0.29) | 85%<br>(21%-100%)  | 0.07<br>(0.01-0.14)  |
| 2 <sup>nd</sup> - 2 <sup>nd</sup> +6  | 67%<br>(59%-74%)     | 2.63<br>(2.09-3.16)    | 71%<br>(59%-80%)      | 1.48<br>(1.09-1.84) | 66%<br>(14%-93%)  | 0.14<br>(0.02-0.28)  | 91%<br>(68%-100%) | 0.19<br>(0.09-0.30) | NA                 | NA                   |
| 2 <sup>nd</sup> +7 - end of follow-up | 91%<br>(80%-96%)     | 7.33<br>(4.48-10.84)   | 88%<br>(71%-98%)      | 2.90<br>(1.87-4.02) | 84%<br>(30%-100%) | 0.36<br>(0.05-0.70)  | 90%<br>(63%-100%) | 0.50<br>(0.12-0.98) | NA                 | NA                   |
| <b>Females</b>                        |                      |                        |                       |                     |                   |                      |                   |                     |                    |                      |
| 0 - 20                                | 25%<br>(21%-30%)     | 3.83<br>(3.11-4.67)    | 34%<br>(29%-39%)      | 3.23<br>(2.62-3.84) | 61%<br>(43%-74%)  | 0.37<br>(0.22-0.51)  | 65%<br>(38%-81%)  | 0.22<br>(0.11-0.34) | 65%<br>(-98%-100%) | 0.03<br>(-0.01-0.07) |
| 0 - 27                                | 33%<br>(29%-37%)     | 6.43<br>(5.43-7.47)    | 41%<br>(36%-46%)      | 4.92<br>(4.20-5.62) | 73%<br>(61%-81%)  | 0.71<br>(0.50-0.90)  | 73%<br>(55%-84%)  | 0.45<br>(0.28-0.63) | 76%<br>(32%-100%)  | 0.09<br>(0.02-0.17)  |

|                                       |                  |                        |                   |                       |                   |                     |                   |                     |                     |                      |
|---------------------------------------|------------------|------------------------|-------------------|-----------------------|-------------------|---------------------|-------------------|---------------------|---------------------|----------------------|
| 0 - End of follow-up                  | 52%<br>(48%-56%) | 15.39<br>(13.03-17.70) | 59%<br>(53%-63%)  | 10.52<br>(8.71-12.60) | 77%<br>(64%-85%)  | 0.89<br>(0.60-1.20) | 83%<br>(71%-91%)  | 0.81<br>(0.51-1.26) | 68%<br>(-3%-95%)    | 0.11<br>(-0.00-0.22) |
| 14 - 20                               | 50%<br>(41%-57%) | 2.39<br>(1.84-2.86)    | 60%<br>(52%-68%)  | 1.81<br>(1.43-2.19)   | 75%<br>(53%-90%)  | 0.23<br>(0.12-0.36) | 58%<br>(13%-84%)  | 0.12<br>(0.01-0.22) | 68%<br>(-100%-100%) | 0.02<br>(-0.01-0.05) |
| 21 - 27                               | 63%<br>(55%-71%) | 2.38<br>(1.91-2.91)    | 69%<br>(58%-78%)  | 1.38<br>(1.02-1.71)   | 96%<br>(84%-100%) | 0.33<br>(0.20-0.47) | 79%<br>(48%-100%) | 0.18<br>(0.07-0.32) | NA                  | NA                   |
| 2 <sup>nd</sup> - 2 <sup>nd</sup> +6  | 73%<br>(65%-79%) | 2.82<br>(2.29-3.37)    | 83%<br>(75%-89%)  | 1.74<br>(1.37-2.11)   | 100%*             | 0.36<br>(0.22-0.50) | 100%*             | 0.28<br>(0.16-0.41) | NA                  | NA                   |
| 2 <sup>nd</sup> +7 - end of follow-up | 93%<br>(88%-97%) | 9.75<br>(6.84-13.48)   | 96%<br>(90%-100%) | 6.22<br>(3.60-9.56)   | NA                | NA                  | NA                | NA                  | NA                  | NA                   |

### Ages 16-39

|                                       |                  |                        |                   |                      |                    |                      |    |    |    |    |
|---------------------------------------|------------------|------------------------|-------------------|----------------------|--------------------|----------------------|----|----|----|----|
| 0 - 20                                | 21%<br>(16%-27%) | 3.22<br>(2.36-4.31)    | 29%<br>(23%-36%)  | 2.42<br>(1.80-3.08)  | 49%<br>(-65%-92%)  | 0.04<br>(-0.02-0.13) | NA | NA | NA | NA |
| 0 - 27                                | 32%<br>(27%-36%) | 6.54<br>(5.35-7.78)    | 38%<br>(32%-44%)  | 4.03<br>(3.30-4.79)  | 33%<br>(-104%-78%) | 0.04<br>(-0.06-0.14) | NA | NA | NA | NA |
| 0 - End of follow-up                  | 50%<br>(44%-55%) | 15.09<br>(12.49-18.22) | 56%<br>(49%-61%)  | 8.34<br>(6.74-10.01) | 50%<br>(-85%-85%)  | 0.08<br>(-0.06-0.22) | NA | NA | NA | NA |
| 14 - 20                               | 49%<br>(41%-57%) | 2.29<br>(1.74-2.88)    | 57%<br>(46%-68%)  | 1.38<br>(0.99-1.80)  | 74%<br>(-46%-100%) | 0.04<br>(-0.01-0.09) | NA | NA | NA | NA |
| 21 - 27                               | 64%<br>(54%-72%) | 2.80<br>(2.20-3.48)    | 67%<br>(52%-78%)  | 1.27<br>(0.89-1.73)  | NA                 | NA                   | NA | NA | NA | NA |
| 2 <sup>nd</sup> - 2 <sup>nd</sup> +6  | 72%<br>(64%-80%) | 3.19<br>(2.53-3.91)    | 79%<br>(68%-88%)  | 1.44<br>(1.04-1.86)  | NA                 | NA                   | NA | NA | NA | NA |
| 2 <sup>nd</sup> +7 - end of follow-up | 94%<br>(87%-97%) | 8.72<br>(5.72-12.69)   | 99%<br>(96%-100%) | 4.06<br>(2.76-5.66)  | NA                 | NA                   | NA | NA | NA | NA |

### Ages 40-69

|                                       |                  |                        |                  |                      |                   |                     |                   |                     |    |    |
|---------------------------------------|------------------|------------------------|------------------|----------------------|-------------------|---------------------|-------------------|---------------------|----|----|
| 0 - 20                                | 21%<br>(16%-25%) | 2.99<br>(2.28-3.70)    | 29%<br>(24%-34%) | 2.59<br>(2.06-3.17)  | 58%<br>(40%-70%)  | 0.36<br>(0.21-0.51) | 62%<br>(38%-79%)  | 0.22<br>(0.11-0.33) | NA | NA |
| 0 - 27                                | 30%<br>(25%-34%) | 5.60<br>(4.68-6.48)    | 38%<br>(33%-43%) | 4.39<br>(3.67-5.20)  | 70%<br>(58%-79%)  | 0.75<br>(0.53-0.97) | 77%<br>(64%-88%)  | 0.52<br>(0.34-0.70) | NA | NA |
| 0 - End of follow-up                  | 48%<br>(43%-53%) | 13.35<br>(10.87-16.09) | 52%<br>(45%-58%) | 8.49<br>(6.87-10.54) | 74%<br>(62%-82%)  | 1.07<br>(0.74-1.41) | 84%<br>(73%-92%)  | 1.03<br>(0.62-1.59) | NA | NA |
| 14 - 20                               | 47%<br>(40%-55%) | 2.13<br>(1.69-2.66)    | 59%<br>(50%-67%) | 1.68<br>(1.32-2.05)  | 90%<br>(77%-98%)  | 0.29<br>(0.19-0.40) | 75%<br>(49%-92%)  | 0.17<br>(0.08-0.26) | NA | NA |
| 21 - 27                               | 58%<br>(49%-67%) | 2.19<br>(1.67-2.70)    | 65%<br>(53%-74%) | 1.38<br>(1.03-1.80)  | 90%<br>(77%-100%) | 0.37<br>(0.24-0.51) | 92%<br>(76%-100%) | 0.23<br>(0.12-0.35) | NA | NA |
| 2 <sup>nd</sup> - 2 <sup>nd</sup> +6  | 70%<br>(61%-76%) | 2.64<br>(2.14-3.20)    | 78%<br>(70%-85%) | 1.75<br>(1.38-2.16)  | 100%*             | 0.41<br>(0.26-0.57) | 100%*             | 0.30<br>(0.18-0.41) | NA | NA |
| 2 <sup>nd</sup> +7 - end of follow-up | 90%<br>(82%-95%) | 8.96<br>(6.16-13.05)   | 90%<br>(75%-98%) | 5.01<br>(2.53-8.67)  | NA                | NA                  | NA                | NA                  | NA | NA |

### Ages 70+

|        |                 |                     |                  |                     |                  |                     |                  |                     |                   |                      |
|--------|-----------------|---------------------|------------------|---------------------|------------------|---------------------|------------------|---------------------|-------------------|----------------------|
| 0 - 20 | 19%<br>(4%-31%) | 1.94<br>(0.37-3.35) | 30%<br>(16%-42%) | 2.52<br>(1.16-3.81) | 47%<br>(24%-66%) | 1.15<br>(0.50-1.87) | 58%<br>(31%-76%) | 1.08<br>(0.44-1.71) | 59%<br>(-39%-92%) | 0.24<br>(-0.07-0.56) |
|--------|-----------------|---------------------|------------------|---------------------|------------------|---------------------|------------------|---------------------|-------------------|----------------------|

|                                       |                   |                      |                   |                      |                    |                      |                   |                      |                    |                      |
|---------------------------------------|-------------------|----------------------|-------------------|----------------------|--------------------|----------------------|-------------------|----------------------|--------------------|----------------------|
| 0 - 27                                | 26%<br>(14%-37%)  | 3.54<br>(1.76-5.37)  | 36%<br>(25%-48%)  | 3.91<br>(2.44-5.57)  | 51%<br>(29%-66%)   | 1.67<br>(0.81-2.48)  | 60%<br>(39%-75%)  | 1.62<br>(0.83-2.38)  | 70%<br>(28%-91%)   | 0.65<br>(0.17-1.12)  |
| 0 - End of follow-up                  | 47%<br>(36%-56%)  | 9.59<br>(6.54-12.75) | 54%<br>(41%-63%)  | 8.47<br>(5.50-11.26) | 57%<br>(34%-71%)   | 2.29<br>(1.13-3.45)  | 68%<br>(50%-82%)  | 2.49<br>(1.47-3.68)  | 75%<br>(38%-93%)   | 1.37<br>(0.38-2.51)  |
| 14 - 20                               | 22%<br>(-9%-44%)  | 0.81<br>(-0.28-1.89) | 44%<br>(19%-64%)  | 1.36<br>(0.48-2.36)  | 38%<br>(-48%-71%)  | 0.33<br>(-0.23-0.80) | 50%<br>(-6%-76%)  | 0.50<br>(-0.04-0.99) | 68%<br>(-31%-100%) | 0.20<br>(-0.04-0.45) |
| 21 - 27                               | 50%<br>(19%-72%)  | 1.40<br>(0.42-2.35)  | 64%<br>(37%-83%)  | 1.35<br>(0.62-2.22)  | 49%<br>(-87%-91%)  | 0.22<br>(-0.17-0.61) | 62%<br>(1%-92%)   | 0.49<br>(0.00-0.95)  | 79%<br>(9%-100%)   | 0.41<br>(0.02-0.79)  |
| 2 <sup>nd</sup> - 2nd+6               | 58%<br>(32%-76%)  | 1.68<br>(0.71-2.65)  | 69%<br>(38%-86%)  | 1.46<br>(0.59-2.26)  | 62%<br>(-32%-100%) | 0.29<br>(-0.07-0.66) | 90%<br>(58%-100%) | 0.64<br>(0.25-1.12)  | 100%*              | 0.60<br>(0.25-1.02)  |
| 2 <sup>nd</sup> +7 - end of follow-up | 95%<br>(87%-100%) | 6.10<br>(3.43-9.61)  | 98%<br>(90%-100%) | 4.77<br>(2.14-7.70)  | NA                 | NA                   | NA                | NA                   | NA                 | NA                   |

### No Risk Criteria

|                                       |                  |                        |                   |                     |                   |                     |                    |                      |    |    |
|---------------------------------------|------------------|------------------------|-------------------|---------------------|-------------------|---------------------|--------------------|----------------------|----|----|
| 0 - 20                                | 20%<br>(16%-25%) | 2.82<br>(2.12-3.56)    | 26%<br>(20%-32%)  | 2.00<br>(1.51-2.52) | 61%<br>(29%-79%)  | 0.12<br>(0.04-0.20) | 52%<br>(-22%-88%)  | 0.04<br>(-0.01-0.11) | NA | NA |
| 0 - 27                                | 31%<br>(27%-35%) | 5.77<br>(4.93-6.63)    | 37%<br>(31%-42%)  | 3.69<br>(3.02-4.28) | 69%<br>(47%-84%)  | 0.25<br>(0.13-0.37) | 76%<br>(41%-94%)   | 0.13<br>(0.05-0.21)  | NA | NA |
| 0 - End of follow-up                  | 47%<br>(43%-53%) | 12.61<br>(10.61-15.10) | 51%<br>(45%-56%)  | 6.87<br>(5.63-8.25) | 75%<br>(56%-87%)  | 0.32<br>(0.18-0.49) | 87%<br>(67%-96%)   | 0.26<br>(0.12-0.42)  | NA | NA |
| 14 - 20                               | 49%<br>(42%-56%) | 2.13<br>(1.69-2.59)    | 55%<br>(45%-63%)  | 1.32<br>(0.98-1.67) | 92%<br>(67%-100%) | 0.09<br>(0.04-0.14) | 65%<br>(-65%-100%) | 0.03<br>(-0.01-0.07) | NA | NA |
| 21 - 27                               | 66%<br>(58%-73%) | 2.49<br>(1.99-2.98)    | 73%<br>(62%-82%)  | 1.27<br>(0.92-1.64) | 76%<br>(29%-100%) | 0.11<br>(0.02-0.20) | 100%*              | 0.08<br>(0.03-0.14)  | NA | NA |
| 2 <sup>nd</sup> - 2nd+6               | 73%<br>(66%-79%) | 2.78<br>(2.32-3.27)    | 82%<br>(74%-89%)  | 1.50<br>(1.16-1.80) | 81%<br>(33%-100%) | 0.11<br>(0.03-0.21) | 100%*              | 0.06<br>(0.01-0.11)  | NA | NA |
| 2 <sup>nd</sup> +7 - end of follow-up | 91%<br>(83%-96%) | 7.67<br>(4.90-11.07)   | 93%<br>(78%-100%) | 3.54<br>(1.79-5.90) | NA                | NA                  | NA                 | NA                   | NA | NA |

### One or Two Risk Criteria

|                                       |                  |                        |                   |                       |                   |                     |                  |                     |    |    |
|---------------------------------------|------------------|------------------------|-------------------|-----------------------|-------------------|---------------------|------------------|---------------------|----|----|
| 0 - 20                                | 20%<br>(14%-26%) | 3.04<br>(2.02-4.09)    | 32%<br>(25%-39%)  | 3.07<br>(2.32-3.93)   | 37%<br>(9%-58%)   | 0.24<br>(0.04-0.45) | 56%<br>(23%-78%) | 0.22<br>(0.08-0.39) | NA | NA |
| 0 - 27                                | 29%<br>(24%-34%) | 5.79<br>(4.56-7.12)    | 39%<br>(33%-44%)  | 4.89<br>(3.95-5.69)   | 55%<br>(33%-70%)  | 0.54<br>(0.28-0.83) | 62%<br>(39%-79%) | 0.39<br>(0.18-0.60) | NA | NA |
| 0 - End of follow-up                  | 52%<br>(45%-58%) | 16.10<br>(12.90-19.90) | 57%<br>(50%-64%)  | 10.93<br>(8.49-14.09) | 60%<br>(41%-74%)  | 0.76<br>(0.40-1.17) | 74%<br>(49%-88%) | 0.76<br>(0.32-1.44) | NA | NA |
| 14 - 20                               | 43%<br>(32%-53%) | 2.05<br>(1.41-2.73)    | 57%<br>(45%-66%)  | 1.74<br>(1.25-2.24)   | 67%<br>(36%-88%)  | 0.22<br>(0.08-0.36) | 62%<br>(9%-91%)  | 0.14<br>(0.01-0.28) | NA | NA |
| 21 - 27                               | 56%<br>(45%-65%) | 2.43<br>(1.77-3.16)    | 62%<br>(47%-73%)  | 1.56<br>(1.05-2.06)   | 93%<br>(72%-100%) | 0.32<br>(0.16-0.48) | 70%<br>(13%-94%) | 0.15<br>(0.02-0.28) | NA | NA |
| 2 <sup>nd</sup> - 2nd+6               | 69%<br>(59%-77%) | 3.09<br>(2.38-3.80)    | 75%<br>(64%-83%)  | 1.87<br>(1.36-2.35)   | 100%*             | 0.35<br>(0.20-0.52) | 100%*            | 0.28<br>(0.13-0.43) | NA | NA |
| 2 <sup>nd</sup> +7 - end of follow-up | 95%<br>(88%-98%) | 10.53<br>(6.73-14.40)  | 95%<br>(88%-100%) | 6.21<br>(3.82-8.95)   | NA                | NA                  | NA               | NA                  | NA | NA |

### Three or More Risk Criteria

|                                       |                   |                        |                   |                        |                    |                      |                    |                      |                    |                      |
|---------------------------------------|-------------------|------------------------|-------------------|------------------------|--------------------|----------------------|--------------------|----------------------|--------------------|----------------------|
| 0 - 20                                | 25%<br>(13%-36%)  | 3.59<br>(1.71-5.39)    | 35%<br>(23%-47%)  | 3.76<br>(2.26-5.36)    | 60%<br>(44%-74%)   | 1.87<br>(1.13-2.63)  | 63%<br>(42%-79%)   | 1.39<br>(0.75-2.09)  | 67%<br>(10%-94%)   | 0.35<br>(0.03-0.70)  |
| 0 - 27                                | 29%<br>(18%-39%)  | 5.30<br>(2.95-7.48)    | 38%<br>(26%-48%)  | 5.04<br>(3.16-6.85)    | 62%<br>(46%-75%)   | 2.74<br>(1.79-3.73)  | 71%<br>(56%-84%)   | 2.51<br>(1.71-3.42)  | 72%<br>(37%-93%)   | 0.74<br>(0.26-1.23)  |
| 0 - End of follow-up                  | 42%<br>(32%-50%)  | 10.55<br>(7.19-14.04)  | 49%<br>(37%-59%)  | 8.72<br>(5.70-11.85)   | 68%<br>(53%-78%)   | 3.87<br>(2.49-5.36)  | 77%<br>(65%-87%)   | 4.12<br>(2.80-5.69)  | 77%<br>(43%-93%)   | 1.62<br>(0.43-3.10)  |
| 14 - 20                               | 37%<br>(12%-55%)  | 1.60<br>(0.43-2.76)    | 62%<br>(43%-77%)  | 2.19<br>(1.20-3.18)    | 70%<br>(37%-90%)   | 0.87<br>(0.35-1.43)  | 62%<br>(29%-84%)   | 0.80<br>(0.28-1.34)  | 64%<br>(-34%-100%) | 0.24<br>(-0.05-0.55) |
| 21 - 27                               | 37%<br>(-1%-62%)  | 1.03<br>(-0.03-2.02)   | 47%<br>(11%-73%)  | 0.97<br>(0.16-1.86)    | 62%<br>(1%-92%)    | 0.50<br>(0.01-0.99)  | 81%<br>(48%-100%)  | 0.85<br>(0.33-1.43)  | 78%<br>(14%-100%)  | 0.39<br>(0.05-0.80)  |
| 2 <sup>nd</sup> - 2 <sup>nd</sup> +6  | 49%<br>(13%-72%)  | 1.30<br>(0.29-2.31)    | 65%<br>(31%-85%)  | 1.35<br>(0.49-2.20)    | 78%<br>(30%-100%)  | 0.67<br>(0.18-1.17)  | 93%<br>(70%-100%)  | 1.00<br>(0.51-1.55)  | 100%*              | 0.52<br>(0.20-0.91)  |
| 2 <sup>nd</sup> +7 - end of follow-up | 86%<br>(72%-95%)  | 5.83<br>(3.16-9.03)    | 89%<br>(68%-98%)  | 3.97<br>(1.41-6.68)    | NA                 | NA                   | 88%<br>(50%-100%)  | 1.62<br>(0.34-3.14)  | NA                 | NA                   |
| <b>Obesity</b>                        |                   |                        |                   |                        |                    |                      |                    |                      |                    |                      |
| 0 - 20                                | 24%<br>(14%-33%)  | 4.29<br>(2.32-6.42)    | 33%<br>(22%-44%)  | 4.09<br>(2.43-5.77)    | 71%<br>(47%-86%)   | 1.09<br>(0.54-1.64)  | 66%<br>(31%-88%)   | 0.71<br>(0.24-1.24)  | NA                 | NA                   |
| 0 - 27                                | 28%<br>(19%-38%)  | 6.51<br>(4.17-9.37)    | 37%<br>(26%-48%)  | 5.62<br>(3.57-7.61)    | 74%<br>(53%-88%)   | 1.56<br>(0.88-2.24)  | 74%<br>(50%-90%)   | 1.05<br>(0.50-1.61)  | NA                 | NA                   |
| 0 - End of follow-up                  | 52%<br>(40%-61%)  | 19.55<br>(12.21-27.55) | 62%<br>(51%-72%)  | 16.19<br>(10.80-23.46) | 80%<br>(57%-92%)   | 2.92<br>(1.51-4.95)  | 88%<br>(69%-96%)   | 3.45<br>(1.21-6.47)  | NA                 | NA                   |
| 14 - 20                               | 49%<br>(32%-65%)  | 2.50<br>(1.40-3.75)    | 65%<br>(48%-79%)  | 2.31<br>(1.32-3.33)    | 85%<br>(51%-100%)  | 0.57<br>(0.23-1.00)  | 60%<br>(-17%-92%)  | 0.37<br>(-0.05-0.84) | NA                 | NA                   |
| 21 - 27                               | 48%<br>(19%-66%)  | 2.02<br>(0.69-3.25)    | 50%<br>(11%-73%)  | 1.25<br>(0.18-2.27)    | 82%<br>(-4%-100%)  | 0.41<br>(-0.01-0.85) | 100%*              | 0.21<br>(0.07-0.51)  | NA                 | NA                   |
| 2 <sup>nd</sup> - 2 <sup>nd</sup> +6  | 62%<br>(35%-80%)  | 2.73<br>(1.28-4.20)    | 74%<br>(48%-90%)  | 2.10<br>(1.04-3.23)    | 100%*              | 0.55<br>(0.21-1.00)  | 100%*              | 0.33<br>(0.07-0.73)  | NA                 | NA                   |
| 2 <sup>nd</sup> +7 - end of follow-up | 95%<br>(88%-100%) | 12.43<br>(6.03-20.70)  | 98%<br>(91%-100%) | 9.60<br>(4.03-17.39)   | NA                 | NA                   | NA                 | NA                   | NA                 | NA                   |
| <b>Type II Diabetes Mellitus</b>      |                   |                        |                   |                        |                    |                      |                    |                      |                    |                      |
| 0 - 20                                | 17%<br>(1%-29%)   | 2.55<br>(0.11-4.61)    | 23%<br>(5%-39%)   | 2.58<br>(0.53-4.65)    | 55%<br>(30%-74%)   | 1.59<br>(0.70-2.53)  | 62%<br>(32%-82%)   | 1.45<br>(0.56-2.39)  | 84%<br>(18%-100%)  | 0.42<br>(0.05-0.87)  |
| 0 - 27                                | 24%<br>(9%-36%)   | 4.50<br>(1.60-7.08)    | 30%<br>(13%-42%)  | 4.02<br>(1.58-6.22)    | 59%<br>(37%-78%)   | 2.33<br>(1.20-3.69)  | 64%<br>(38%-81%)   | 2.11<br>(1.03-3.16)  | 86%<br>(53%-100%)  | 1.08<br>(0.40-1.81)  |
|                                       | 41%<br>(27%-52%)  | 10.91<br>(6.39-15.48)  | 45%<br>(29%-58%)  | 8.47<br>(4.48-12.87)   | 70%<br>(49%-83%)   | 4.28<br>(2.12-6.43)  | 80%<br>(61%-90%)   | 4.69<br>(2.34-7.69)  | 93%<br>(74%-100%)  | 2.52<br>(0.81-4.84)  |
| 14 - 20                               | 25%<br>(-10%-51%) | 1.17<br>(-0.36-2.74)   | 48%<br>(14%-68%)  | 1.94<br>(0.49-3.28)    | 78%<br>(31%-100%)  | 0.84<br>(0.18-1.53)  | 68%<br>(19%-94%)   | 0.81<br>(0.17-1.54)  | 76%<br>(-68%-100%) | 0.25<br>(-0.07-0.65) |
| 21 - 27                               | 49%<br>(2%-78%)   | 1.29<br>(0.04-2.67)    | 60%<br>(10%-84%)  | 1.18<br>(0.12-2.27)    | 62%<br>(-83%-100%) | 0.37<br>(-0.17-0.89) | 54%<br>(-79%-100%) | 0.38<br>(-0.23-1.08) | 87%<br>(43%-100%)  | 0.66<br>(0.12-1.24)  |
| 2 <sup>nd</sup> - 2 <sup>nd</sup> +6  | 68%<br>(36%-88%)  | 2.01<br>(0.74-3.34)    | 76%<br>(34%-95%)  | 1.63<br>(0.43-2.77)    | 100%*              | 0.53<br>(0.12-0.99)  | 100%*              | 0.80<br>(0.28-1.46)  | NA                 | NA                   |

|                                       |                   |                       |                   |                      |                   |                     |                   |                     |                   |                      |
|---------------------------------------|-------------------|-----------------------|-------------------|----------------------|-------------------|---------------------|-------------------|---------------------|-------------------|----------------------|
| 2 <sup>nd</sup> +7 - end of follow-up | 91%<br>(71%-100%) | 6.85<br>(3.31-11.33)  | 91%<br>(68%-100%) | 5.06<br>(1.84-8.96)  | NA                | NA                  | NA                | NA                  | NA                | NA                   |
| <b>Hypertension</b>                   |                   |                       |                   |                      |                   |                     |                   |                     |                   |                      |
| 0 - 20                                | 18%<br>(6%-30%)   | 2.25<br>(0.68-3.99)   | 27%<br>(12%-40%)  | 2.44<br>(0.98-3.94)  | 54%<br>(32%-70%)  | 1.32<br>(0.65-1.99) | 63%<br>(36%-82%)  | 1.09<br>(0.49-1.72) | 79%<br>(26%-100%) | 0.33<br>(0.06-0.63)  |
| 0 - 27                                | 26%<br>(15%-37%)  | 4.28<br>(2.30-6.46)   | 35%<br>(23%-45%)  | 4.18<br>(2.60-5.83)  | 61%<br>(43%-74%)  | 2.13<br>(1.28-2.98) | 70%<br>(52%-82%)  | 2.04<br>(1.18-2.92) | 76%<br>(32%-95%)  | 0.62<br>(0.16-1.03)  |
| 0 - End of follow-up                  | 47%<br>(36%-55%)  | 11.61<br>(8.11-15.62) | 52%<br>(40%-61%)  | 9.45<br>(6.08-12.95) | 68%<br>(52%-79%)  | 3.15<br>(1.93-4.44) | 78%<br>(64%-88%)  | 3.44<br>(2.10-4.92) | 78%<br>(35%-94%)  | 1.31<br>(0.28-2.64)  |
| 14 - 20                               | 28%<br>(2%-49%)   | 1.12<br>(0.08-2.26)   | 45%<br>(16%-64%)  | 1.33<br>(0.37-2.22)  | 59%<br>(17%-83%)  | 0.57<br>(0.12-1.04) | 61%<br>(25%-85%)  | 0.61<br>(0.17-1.11) | 73%<br>(1%-100%)  | 0.23<br>(0.00-0.50)  |
| 21 - 27                               | 45%<br>(15%-66%)  | 1.49<br>(0.42-2.53)   | 59%<br>(31%-79%)  | 1.47<br>(0.60-2.39)  | 67%<br>(11%-93%)  | 0.47<br>(0.05-0.89) | 76%<br>(35%-96%)  | 0.76<br>(0.24-1.21) | 73%<br>(-2%-100%) | 0.29<br>(-0.00-0.63) |
| 2 <sup>nd</sup> - 2 <sup>nd</sup> +6  | 61%<br>(39%-77%)  | 2.07<br>(1.10-3.05)   | 70%<br>(49%-85%)  | 1.69<br>(0.83-2.60)  | 84%<br>(52%-100%) | 0.67<br>(0.25-1.19) | 93%<br>(72%-100%) | 0.94<br>(0.50-1.49) | 100%*             | 0.34<br>(0.11-0.64)  |
| 2 <sup>nd</sup> +7 - end of follow-up | 93%<br>(85%-99%)  | 7.67<br>(4.35-11.72)  | 95%<br>(84%-100%) | 5.60<br>(2.97-8.92)  | NA                | NA                  | NA                | NA                  | NA                | NA                   |

\*No events were recorded in the vaccinated group, precluding estimation of the confidence interval.

Legend: Estimates and 95% confidence intervals for one minus the risk ratio and the risk difference per 1,000 patients for different outcomes over different time periods for different populations. Confidence intervals were estimated using the percentile bootstrap method with 500 repetitions. Estimates were only calculated for cells with more than 10 outcomes across both groups. This table contains all analyses performed in the study.

Abbreviations: RR, Risk ratio; RD, Risk difference; NA: Not available.

## Table S7 – Life Tables using the Kaplan-Meier Approach

The following life tables were used to compute the cumulative incidence curves in the main analysis and in the sensitivity analysis in which censoring of vaccinated controls was delayed (Figure S7, Table S5). These tables are not sufficient to reproduce the VE estimates as these depend on a sub-cohort of matched pairs that were not censored prior to the beginning of the follow-up period of interest.

| Time (Days)                            | Main Analysis  |                  |                                  |                 |                      |                |                  |                                  |                 |                      | Sensitivity Analysis when Delaying Censoring of Vaccinated Controls |                  |                                  |                 |                      |                |                  |                                  |                 |                      |
|----------------------------------------|----------------|------------------|----------------------------------|-----------------|----------------------|----------------|------------------|----------------------------------|-----------------|----------------------|---------------------------------------------------------------------|------------------|----------------------------------|-----------------|----------------------|----------------|------------------|----------------------------------|-----------------|----------------------|
|                                        | Unvaccinated   |                  |                                  |                 |                      | Vaccinated     |                  |                                  |                 |                      | Unvaccinated                                                        |                  |                                  |                 |                      | Vaccinated     |                  |                                  |                 |                      |
|                                        | Number at Risk | Number of Events | Discrete Time Hazard per 100,000 | Number Censored | Cumulative Incidence | Number at Risk | Number of Events | Discrete Time Hazard per 100,000 | Number Censored | Cumulative Incidence | Number at Risk                                                      | Number of Events | Discrete Time Hazard per 100,000 | Number Censored | Cumulative Incidence | Number at Risk | Number of Events | Discrete Time Hazard per 100,000 | Number Censored | Cumulative Incidence |
| <b>Documented SARS-CoV-2 Infection</b> |                |                  |                                  |                 |                      |                |                  |                                  |                 |                      |                                                                     |                  |                                  |                 |                      |                |                  |                                  |                 |                      |
| 1                                      | 596618         | 359              | 60                               | 39285           | 0.001                | 596618         | 172              | 29                               | 39274           | 0.000                | 526877                                                              | 324              | 61                               | 10992           | 0.001                | 526877         | 161              | 31                               | 10988           | 0.000                |
| 2                                      | 556974         | 367              | 66                               | 32763           | 0.001                | 557172         | 235              | 42                               | 32764           | 0.001                | 515561                                                              | 334              | 65                               | 9750            | 0.001                | 515728         | 200              | 39                               | 9754            | 0.001                |
| 3                                      | 523844         | 346              | 66                               | 27489           | 0.002                | 524173         | 313              | 60                               | 27476           | 0.001                | 505477                                                              | 304              | 60                               | 6717            | 0.002                | 505774         | 300              | 59                               | 6717            | 0.001                |
| 4                                      | 496009         | 356              | 72                               | 25898           | 0.003                | 496384         | 287              | 58                               | 25893           | 0.002                | 498456                                                              | 332              | 67                               | 6943            | 0.003                | 498757         | 283              | 57                               | 6952            | 0.002                |
| 5                                      | 469755         | 332              | 71                               | 29741           | 0.003                | 470204         | 317              | 67                               | 29729           | 0.003                | 491181                                                              | 315              | 64                               | 12117           | 0.003                | 491522         | 311              | 63                               | 12136           | 0.002                |
| 6                                      | 439682         | 297              | 68                               | 26333           | 0.004                | 440158         | 292              | 66                               | 26339           | 0.003                | 478749                                                              | 297              | 62                               | 10151           | 0.004                | 479075         | 299              | 62                               | 10182           | 0.003                |
| 7                                      | 413052         | 305              | 74                               | 27705           | 0.005                | 413527         | 349              | 84                               | 27668           | 0.004                | 468301                                                              | 327              | 70                               | 12239           | 0.004                | 468594         | 365              | 78                               | 12238           | 0.004                |
| 8                                      | 385042         | 278              | 72                               | 26874           | 0.005                | 385510         | 308              | 80                               | 26869           | 0.005                | 455735                                                              | 295              | 65                               | 34229           | 0.005                | 455991         | 347              | 76                               | 34267           | 0.005                |
| 9                                      | 357890         | 216              | 60                               | 24338           | 0.006                | 358333         | 291              | 81                               | 24344           | 0.006                | 421211                                                              | 229              | 54                               | 30105           | 0.006                | 421377         | 344              | 82                               | 30134           | 0.005                |
| 10                                     | 333336         | 228              | 68                               | 19339           | 0.007                | 333698         | 227              | 68                               | 19313           | 0.006                | 390877                                                              | 253              | 65                               | 25185           | 0.006                | 390899         | 263              | 67                               | 25167           | 0.006                |
| 11                                     | 313769         | 251              | 80                               | 17049           | 0.008                | 314158         | 209              | 67                               | 17005           | 0.007                | 365439                                                              | 261              | 71                               | 22369           | 0.007                | 365469         | 232              | 63                               | 22345           | 0.007                |
| 12                                     | 296469         | 200              | 67                               | 18147           | 0.008                | 296944         | 184              | 62                               | 18130           | 0.008                | 342809                                                              | 219              | 64                               | 23392           | 0.008                | 342892         | 204              | 59                               | 23363           | 0.007                |
| 13                                     | 278122         | 229              | 82                               | 16268           | 0.009                | 278630         | 178              | 64                               | 16272           | 0.008                | 319198                                                              | 239              | 75                               | 21789           | 0.008                | 319325         | 199              | 62                               | 21763           | 0.008                |
| 14                                     | 261625         | 207              | 79                               | 14683           | 0.010                | 262180         | 171              | 65                               | 14670           | 0.009                | 297170                                                              | 218              | 73                               | 20096           | 0.009                | 297363         | 174              | 59                               | 20082           | 0.009                |
| 15                                     | 246735         | 185              | 75                               | 12471           | 0.011                | 247339         | 109              | 44                               | 12447           | 0.009                | 276856                                                              | 200              | 72                               | 16804           | 0.010                | 277107         | 128              | 46                               | 16748           | 0.009                |
| 16                                     | 234079         | 159              | 68                               | 11860           | 0.011                | 234783         | 94               | 40                               | 11863           | 0.010                | 259852                                                              | 167              | 64                               | 15174           | 0.010                | 260231         | 111              | 43                               | 15156           | 0.009                |
| 17                                     | 222060         | 153              | 69                               | 8795            | 0.012                | 222826         | 102              | 46                               | 8765            | 0.010                | 244511                                                              | 153              | 63                               | 11660           | 0.011                | 244964         | 114              | 47                               | 11647           | 0.010                |
| 18                                     | 213112         | 164              | 77                               | 8665            | 0.013                | 213959         | 72               | 34                               | 8643            | 0.011                | 232698                                                              | 171              | 73                               | 10969           | 0.012                | 233203         | 74               | 32                               | 10936           | 0.010                |
| 19                                     | 204283         | 167              | 82                               | 9741            | 0.013                | 205244         | 93               | 45                               | 9723            | 0.011                | 221558                                                              | 175              | 79                               | 11504           | 0.013                | 222193         | 94               | 42                               | 11487           | 0.011                |
| 20                                     | 194375         | 158              | 81                               | 7664            | 0.014                | 195428         | 69               | 35                               | 7657            | 0.011                | 209879                                                              | 174              | 83                               | 8950            | 0.013                | 210612         | 76               | 36                               | 8952            | 0.011                |
| 21                                     | 186553         | 147              | 79                               | 6316            | 0.015                | 187702         | 52               | 28                               | 6298            | 0.012                | 200755                                                              | 147              | 73                               | 7340            | 0.014                | 201584         | 58               | 29                               | 7316            | 0.011                |
| 22                                     | 180090         | 134              | 74                               | 6158            | 0.016                | 181352         | 54               | 30                               | 6151            | 0.012                | 193268                                                              | 142              | 73                               | 7124            | 0.015                | 194210         | 62               | 32                               | 7121            | 0.012                |
| 23                                     | 173798         | 105              | 60                               | 10041           | 0.016                | 175147         | 45               | 26                               | 10057           | 0.012                | 186002                                                              | 111              | 60                               | 10903           | 0.015                | 187027         | 48               | 26                               | 10905           | 0.012                |

| Time (Days)                              | Main Analysis  |                  |                                  |                 |                      |                |                  |                                  |                 |                      | Sensitivity Analysis when Delaying Censoring of Vaccinated Controls |                  |                                  |                 |                      |                |                  |                                  |                 |                      |
|------------------------------------------|----------------|------------------|----------------------------------|-----------------|----------------------|----------------|------------------|----------------------------------|-----------------|----------------------|---------------------------------------------------------------------|------------------|----------------------------------|-----------------|----------------------|----------------|------------------|----------------------------------|-----------------|----------------------|
|                                          | Unvaccinated   |                  |                                  |                 |                      | Vaccinated     |                  |                                  |                 |                      | Unvaccinated                                                        |                  |                                  |                 |                      | Vaccinated     |                  |                                  |                 |                      |
|                                          | Number at Risk | Number of Events | Discrete Time Hazard per 100,000 | Number Censored | Cumulative Incidence | Number at Risk | Number of Events | Discrete Time Hazard per 100,000 | Number Censored | Cumulative Incidence | Number at Risk                                                      | Number of Events | Discrete Time Hazard per 100,000 | Number Censored | Cumulative Incidence | Number at Risk | Number of Events | Discrete Time Hazard per 100,000 | Number Censored | Cumulative Incidence |
| 24                                       | 163652         | 102              | 62                               | 13852           | 0.017                | 165045         | 40               | 24                               | 13889           | 0.012                | 174988                                                              | 115              | 66                               | 14405           | 0.016                | 176074         | 41               | 23                               | 14429           | 0.012                |
| 25                                       | 149698         | 90               | 60                               | 15716           | 0.018                | 151116         | 40               | 26                               | 15801           | 0.013                | 160468                                                              | 87               | 54                               | 16250           | 0.017                | 161604         | 42               | 26                               | 16314           | 0.012                |
| 26                                       | 133892         | 88               | 66                               | 16045           | 0.018                | 135275         | 33               | 24                               | 16163           | 0.013                | 144131                                                              | 96               | 67                               | 16415           | 0.017                | 145248         | 31               | 21                               | 16498           | 0.013                |
| 27                                       | 117759         | 77               | 65                               | 10473           | 0.019                | 119079         | 34               | 29                               | 10516           | 0.013                | 127620                                                              | 80               | 63                               | 10617           | 0.018                | 128719         | 34               | 26                               | 10674           | 0.013                |
| 28                                       | 107209         | 75               | 70                               | 11454           | 0.020                | 108529         | 35               | 32                               | 11516           | 0.013                | 116923                                                              | 80               | 68                               | 11983           | 0.019                | 118011         | 36               | 31                               | 12031           | 0.013                |
| 29                                       | 95680          | 56               | 59                               | 13515           | 0.020                | 96978          | 16               | 16                               | 13635           | 0.014                | 104860                                                              | 58               | 55                               | 14331           | 0.019                | 105944         | 15               | 14                               | 14437           | 0.013                |
| 30                                       | 82109          | 38               | 46                               | 12187           | 0.021                | 83327          | 10               | 12                               | 12300           | 0.014                | 90471                                                               | 41               | 45                               | 12804           | 0.020                | 91492          | 10               | 11                               | 12889           | 0.013                |
| 31                                       | 69884          | 51               | 73                               | 6756            | 0.021                | 71017          | 9                | 13                               | 6804            | 0.014                | 77626                                                               | 51               | 66                               | 7368            | 0.020                | 78593          | 10               | 13                               | 7409            | 0.013                |
| 32                                       | 63077          | 40               | 63                               | 5915            | 0.022                | 64204          | 11               | 17                               | 6008            | 0.014                | 70207                                                               | 41               | 58                               | 6526            | 0.021                | 71174          | 13               | 18                               | 6604            | 0.014                |
| 33                                       | 57122          | 34               | 60                               | 10391           | 0.023                | 58185          | 2                | 3                                | 10548           | 0.014                | 63640                                                               | 38               | 60                               | 11395           | 0.021                | 64557          | 1                | 2                                | 11523           | 0.014                |
| 34                                       | 46697          | 37               | 79                               | 9496            | 0.023                | 47635          | 2                | 4                                | 9604            | 0.014                | 52207                                                               | 37               | 71                               | 10465           | 0.022                | 53033          | 2                | 4                                | 10547           | 0.014                |
| 35                                       | 37164          | 22               | 59                               | 10005           | 0.024                | 38029          | 1                | 3                                | 10209           | 0.014                | 41705                                                               | 24               | 58                               | 10978           | 0.023                | 42484          | 2                | 5                                | 11157           | 0.014                |
| 36                                       | 27137          | 20               | 74                               | 8283            | 0.025                | 27819          | 1                | 4                                | 8461            | 0.014                | 30703                                                               | 22               | 72                               | 9278            | 0.023                | 31325          | 2                | 6                                | 9435            | 0.014                |
| 37                                       | 18834          | 6                | 32                               | 5733            | 0.025                | 19357          | 0                | 0                                | 5895            | 0.014                | 21403                                                               | 8                | 37                               | 6409            | 0.024                | 21888          | 0                | 0                                | 6562            | 0.014                |
| 38                                       | 13095          | 4                | 31                               | 1778            | 0.025                | 13462          | 1                | 7                                | 1825            | 0.014                | 14986                                                               | 5                | 33                               | 2036            | 0.024                | 15326          | 1                | 7                                | 2077            | 0.014                |
| 39                                       | 11313          | 2                | 18                               | 1828            | 0.025                | 11636          | 2                | 17                               | 1872            | 0.014                | 12945                                                               | 4                | 31                               | 2084            | 0.024                | 13248          | 2                | 15                               | 2120            | 0.014                |
| 40                                       | 9483           | 8                | 84                               | 2854            | 0.026                | 9762           | 0                | 0                                | 2942            | 0.014                | 10857                                                               | 8                | 74                               | 3293            | 0.025                | 11126          | 0                | 0                                | 3378            | 0.014                |
| 41                                       | 6621           | 3                | 45                               | 2486            | 0.027                | 6820           | 0                | 0                                | 2558            | 0.014                | 7556                                                                | 3                | 40                               | 2833            | 0.025                | 7748           | 0                | 0                                | 2904            | 0.014                |
| 42                                       | 4132           | 4                | 97                               | 2092            | 0.028                | 4262           | 0                | 0                                | 2165            | 0.014                | 4720                                                                | 4                | 85                               | 2358            | 0.026                | 4844           | 0                | 0                                | 2430            | 0.014                |
| 43                                       | 2036           | 1                | 49                               | 1531            | 0.028                | 2097           | 0                | 0                                | 1576            | 0.014                | 2358                                                                | 1                | 42                               | 1748            | 0.027                | 2414           | 0                | 0                                | 1789            | 0.014                |
| 44                                       | 504            | 0                | 0                                | 504             | 0.028                | 521            | 0                | 0                                | 521             | 0.014                | 609                                                                 | 0                | 0                                | 609             | 0.027                | 625            | 0                | 0                                | 625             | 0.014                |
| <b>Asymptomatic SARS-CoV-2 Infection</b> |                |                  |                                  |                 |                      |                |                  |                                  |                 |                      |                                                                     |                  |                                  |                 |                      |                |                  |                                  |                 |                      |
| 1                                        | 596618         | 132              | 22                               | 39286           | 0.000                | 596618         | 82               | 14                               | 39278           | 0.000                | 526877                                                              | 123              | 23                               | 10992           | 0.000                | 526877         | 75               | 14                               | 10988           | 0.000                |
| 2                                        | 557200         | 145              | 26                               | 32768           | 0.000                | 557258         | 119              | 21                               | 32769           | 0.000                | 515762                                                              | 135              | 26                               | 9755            | 0.000                | 515814         | 99               | 19                               | 9756            | 0.000                |
| 3                                        | 524287         | 147              | 28                               | 27499           | 0.001                | 524370         | 123              | 23                               | 27492           | 0.001                | 505872                                                              | 121              | 24                               | 6721            | 0.001                | 505959         | 114              | 23                               | 6719            | 0.001                |
| 4                                        | 496641         | 158              | 32                               | 25914           | 0.001                | 496755         | 133              | 27                               | 25909           | 0.001                | 499030                                                              | 150              | 30                               | 6953            | 0.001                | 499126         | 133              | 27                               | 6956            | 0.001                |
| 5                                        | 470569         | 128              | 27                               | 29763           | 0.001                | 470713         | 124              | 26                               | 29763           | 0.001                | 491927                                                              | 113              | 23                               | 12132           | 0.001                | 492037         | 116              | 24                               | 12144           | 0.001                |
| 6                                        | 440678         | 118              | 27                               | 26367           | 0.002                | 440826         | 127              | 29                               | 26374           | 0.001                | 479682                                                              | 124              | 26                               | 10176           | 0.002                | 479777         | 130              | 27                               | 10190           | 0.001                |
| 7                                        | 414193         | 115              | 28                               | 27743           | 0.002                | 414325         | 154              | 37                               | 27726           | 0.002                | 469382                                                              | 118              | 25                               | 12264           | 0.002                | 469457         | 162              | 35                               | 12268           | 0.002                |
| 8                                        | 386335         | 118              | 31                               | 26929           | 0.002                | 386445         | 137              | 35                               | 26928           | 0.002                | 457000                                                              | 121              | 26                               | 34324           | 0.002                | 457027         | 145              | 32                               | 34347           | 0.002                |
| 9                                        | 359288         | 83               | 23                               | 24402           | 0.002                | 359380         | 120              | 33                               | 24402           | 0.002                | 422555                                                              | 82               | 19                               | 30191           | 0.002                | 422535         | 136              | 32                               | 30207           | 0.002                |
| 10                                       | 334803         | 86               | 26                               | 19369           | 0.003                | 334858         | 97               | 29                               | 19363           | 0.003                | 392282                                                              | 99               | 25                               | 25242           | 0.002                | 392192         | 106              | 27                               | 25235           | 0.003                |
| 11                                       | 315348         | 111              | 35                               | 17070           | 0.003                | 315398         | 99               | 31                               | 17051           | 0.003                | 366941                                                              | 114              | 31                               | 22417           | 0.003                | 366851         | 110              | 30                               | 22404           | 0.003                |



| Time (Days) | Main Analysis  |                  |                                  |                 |                      |                |                  |                                  |                 |                      | Sensitivity Analysis when Delaying Censoring of Vaccinated Controls |                  |                                  |                 |                      |                |                  |                                  |                 |                      |
|-------------|----------------|------------------|----------------------------------|-----------------|----------------------|----------------|------------------|----------------------------------|-----------------|----------------------|---------------------------------------------------------------------|------------------|----------------------------------|-----------------|----------------------|----------------|------------------|----------------------------------|-----------------|----------------------|
|             | Unvaccinated   |                  |                                  |                 |                      | Vaccinated     |                  |                                  |                 |                      | Unvaccinated                                                        |                  |                                  |                 |                      | Vaccinated     |                  |                                  |                 |                      |
|             | Number at Risk | Number of Events | Discrete Time Hazard per 100,000 | Number Censored | Cumulative Incidence | Number at Risk | Number of Events | Discrete Time Hazard per 100,000 | Number Censored | Cumulative Incidence | Number at Risk                                                      | Number of Events | Discrete Time Hazard per 100,000 | Number Censored | Cumulative Incidence | Number at Risk | Number of Events | Discrete Time Hazard per 100,000 | Number Censored | Cumulative Incidence |
| 12          | 298167         | 89               | 30                               | 18208           | 0.003                | 298248         | 87               | 29                               | 18211           | 0.003                | 344410                                                              | 96               | 28                               | 23473           | 0.003                | 344337         | 95               | 28                               | 23459           | 0.003                |
| 13          | 279870         | 78               | 28                               | 16345           | 0.004                | 279950         | 78               | 28                               | 16332           | 0.004                | 320841                                                              | 78               | 24                               | 21877           | 0.003                | 320783         | 82               | 26                               | 21860           | 0.003                |
| 14          | 263447         | 70               | 27                               | 14742           | 0.004                | 263540         | 86               | 33                               | 14739           | 0.004                | 298886                                                              | 79               | 26                               | 20173           | 0.004                | 298841         | 80               | 27                               | 20169           | 0.004                |
| 15          | 248635         | 59               | 24                               | 12535           | 0.004                | 248715         | 51               | 21                               | 12512           | 0.004                | 278634                                                              | 65               | 23                               | 16869           | 0.004                | 278592         | 60               | 22                               | 16838           | 0.004                |
| 16          | 236041         | 56               | 24                               | 11932           | 0.004                | 236152         | 52               | 22                               | 11931           | 0.004                | 261700                                                              | 60               | 23                               | 15256           | 0.004                | 261694         | 61               | 23                               | 15235           | 0.004                |
| 17          | 224053         | 74               | 33                               | 8833            | 0.005                | 224169         | 57               | 25                               | 8815            | 0.005                | 246384                                                              | 73               | 30                               | 11709           | 0.004                | 246398         | 65               | 26                               | 11697           | 0.004                |
| 18          | 215146         | 70               | 33                               | 8703            | 0.005                | 215297         | 39               | 18                               | 8696            | 0.005                | 234602                                                              | 74               | 32                               | 11018           | 0.005                | 234636         | 43               | 18                               | 11008           | 0.005                |
| 19          | 206373         | 66               | 32                               | 9804            | 0.005                | 206562         | 43               | 21                               | 9786            | 0.005                | 223510                                                              | 74               | 33                               | 11577           | 0.005                | 223585         | 41               | 18                               | 11561           | 0.005                |
| 20          | 196503         | 60               | 31                               | 7709            | 0.006                | 196733         | 33               | 17                               | 7701            | 0.005                | 211859                                                              | 68               | 32                               | 8998            | 0.005                | 211983         | 36               | 17                               | 8998            | 0.005                |
| 21          | 188734         | 62               | 33                               | 6344            | 0.006                | 188999         | 33               | 17                               | 6340            | 0.005                | 202793                                                              | 62               | 31                               | 7375            | 0.006                | 202949         | 35               | 17                               | 7362            | 0.005                |
| 22          | 182328         | 55               | 30                               | 6194            | 0.006                | 182626         | 35               | 19                               | 6191            | 0.006                | 195356                                                              | 57               | 29                               | 7164            | 0.006                | 195552         | 36               | 18                               | 7165            | 0.005                |
| 23          | 176079         | 51               | 29                               | 10135           | 0.007                | 176400         | 27               | 15                               | 10135           | 0.006                | 188135                                                              | 54               | 29                               | 10990           | 0.006                | 188351         | 28               | 15                               | 10995           | 0.005                |
| 24          | 165893         | 57               | 34                               | 13980           | 0.007                | 166238         | 19               | 11                               | 13990           | 0.006                | 177091                                                              | 60               | 34                               | 14532           | 0.007                | 177328         | 18               | 10                               | 14541           | 0.006                |
| 25          | 151856         | 42               | 28                               | 15899           | 0.007                | 152229         | 17               | 11                               | 15912           | 0.006                | 162499                                                              | 44               | 27                               | 16422           | 0.007                | 162769         | 19               | 12                               | 16427           | 0.006                |
| 26          | 135915         | 32               | 24                               | 16255           | 0.007                | 136300         | 17               | 12                               | 16289           | 0.006                | 146033                                                              | 36               | 25                               | 16602           | 0.007                | 146323         | 16               | 11                               | 16621           | 0.006                |
| 27          | 119628         | 41               | 34                               | 10590           | 0.008                | 119994         | 23               | 19                               | 10596           | 0.006                | 129395                                                              | 40               | 31                               | 10729           | 0.007                | 129686         | 21               | 16                               | 10748           | 0.006                |
| 28          | 108997         | 39               | 36                               | 11585           | 0.008                | 109375         | 20               | 18                               | 11613           | 0.006                | 118626                                                              | 42               | 35                               | 12106           | 0.008                | 118917         | 21               | 18                               | 12130           | 0.006                |
| 29          | 97373          | 29               | 30                               | 13718           | 0.008                | 97742          | 11               | 11                               | 13763           | 0.007                | 106478                                                              | 28               | 26                               | 14523           | 0.008                | 106766         | 9                | 8                                | 14558           | 0.006                |
| 30          | 83626          | 17               | 20                               | 12382           | 0.009                | 83968          | 5                | 6                                | 12411           | 0.007                | 91927                                                               | 20               | 22                               | 12988           | 0.008                | 92199          | 6                | 7                                | 13006           | 0.006                |
| 31          | 71227          | 24               | 34                               | 6853            | 0.009                | 71552          | 8                | 11                               | 6860            | 0.007                | 78919                                                               | 25               | 32                               | 7460            | 0.008                | 79187          | 9                | 11                               | 7471            | 0.006                |
| 32          | 64350          | 10               | 16                               | 6015            | 0.009                | 64684          | 9                | 14                               | 6050            | 0.007                | 71434                                                               | 12               | 17                               | 6619            | 0.009                | 71707          | 10               | 14                               | 6647            | 0.006                |
| 33          | 58325          | 17               | 29                               | 10588           | 0.009                | 58625          | 2                | 3                                | 10629           | 0.007                | 64803                                                               | 18               | 28                               | 11584           | 0.009                | 65050          | 1                | 2                                | 11607           | 0.007                |
| 34          | 47720          | 21               | 44                               | 9666            | 0.010                | 47994          | 1                | 2                                | 9683            | 0.007                | 53201                                                               | 21               | 39                               | 10627           | 0.009                | 53442          | 1                | 2                                | 10640           | 0.007                |
| 35          | 38033          | 11               | 29                               | 10243           | 0.010                | 38310          | 1                | 3                                | 10291           | 0.007                | 42553                                                               | 12               | 28                               | 11205           | 0.010                | 42801          | 2                | 5                                | 11249           | 0.007                |
| 36          | 27779          | 11               | 40                               | 8470            | 0.010                | 28018          | 1                | 4                                | 8534            | 0.007                | 31336                                                               | 12               | 38                               | 9458            | 0.010                | 31550          | 2                | 6                                | 9512            | 0.007                |
| 37          | 19298          | 3                | 16                               | 5876            | 0.011                | 19483          | 0                | 0                                | 5937            | 0.007                | 21866                                                               | 4                | 18                               | 6550            | 0.010                | 22036          | 0                | 0                                | 6611            | 0.007                |
| 38          | 13419          | 1                | 7                                | 1816            | 0.011                | 13546          | 0                | 0                                | 1832            | 0.007                | 15312                                                               | 2                | 13                               | 2075            | 0.010                | 15425          | 0                | 0                                | 2088            | 0.007                |
| 39          | 11602          | 1                | 9                                | 1873            | 0.011                | 11714          | 1                | 9                                | 1886            | 0.007                | 13235                                                               | 1                | 8                                | 2130            | 0.010                | 13337          | 1                | 7                                | 2139            | 0.007                |
| 40          | 9728           | 4                | 41                               | 2923            | 0.011                | 9827           | 0                | 0                                | 2960            | 0.007                | 11104                                                               | 4                | 36                               | 3364            | 0.011                | 11197          | 0                | 0                                | 3397            | 0.007                |
| 41          | 6801           | 0                | 0                                | 2554            | 0.011                | 6867           | 0                | 0                                | 2571            | 0.007                | 7736                                                                | 0                | 0                                | 2901            | 0.011                | 7800           | 0                | 0                                | 2921            | 0.007                |
| 42          | 4247           | 2                | 47                               | 2156            | 0.012                | 4296           | 0                | 0                                | 2183            | 0.007                | 4835                                                                | 2                | 41                               | 2422            | 0.011                | 4879           | 0                | 0                                | 2447            | 0.007                |
| 43          | 2089           | 1                | 48                               | 1570            | 0.012                | 2113           | 0                | 0                                | 1589            | 0.007                | 2411                                                                | 1                | 41                               | 1787            | 0.012                | 2432           | 0                | 0                                | 1804            | 0.007                |
| 44          | 518            | 0                | 0                                | 518             | 0.012                | 524            | 0                | 0                                | 524             | 0.007                | 623                                                                 | 0                | 0                                | 623             | 0.012                | 628            | 0                | 0                                | 628             | 0.007                |

| Time (Days)                             | Main Analysis  |                  |                                  |                 |                      |                |                  |                                  |                 |                      | Sensitivity Analysis when Delaying Censoring of Vaccinated Controls |                  |                                  |                 |                      |                |                  |                                  |                 |                      |
|-----------------------------------------|----------------|------------------|----------------------------------|-----------------|----------------------|----------------|------------------|----------------------------------|-----------------|----------------------|---------------------------------------------------------------------|------------------|----------------------------------|-----------------|----------------------|----------------|------------------|----------------------------------|-----------------|----------------------|
|                                         | Unvaccinated   |                  |                                  |                 |                      | Vaccinated     |                  |                                  |                 |                      | Unvaccinated                                                        |                  |                                  |                 |                      | Vaccinated     |                  |                                  |                 |                      |
|                                         | Number at Risk | Number of Events | Discrete Time Hazard per 100,000 | Number Censored | Cumulative Incidence | Number at Risk | Number of Events | Discrete Time Hazard per 100,000 | Number Censored | Cumulative Incidence | Number at Risk                                                      | Number of Events | Discrete Time Hazard per 100,000 | Number Censored | Cumulative Incidence | Number at Risk | Number of Events | Discrete Time Hazard per 100,000 | Number Censored | Cumulative Incidence |
| <b>Symptomatic SARS-CoV-2 Infection</b> |                |                  |                                  |                 |                      |                |                  |                                  |                 |                      |                                                                     |                  |                                  |                 |                      |                |                  |                                  |                 |                      |
| 1                                       | 596618         | 227              | 38                               | 39287           | 0.000                | 596618         | 90               | 15                               | 39277           | 0.000                | 526877                                                              | 201              | 38                               | 10993           | 0.000                | 526877         | 86               | 16                               | 10988           | 0.000                |
| 2                                       | 557104         | 222              | 40                               | 32773           | 0.001                | 557251         | 116              | 21                               | 32769           | 0.000                | 515683                                                              | 199              | 39                               | 9759            | 0.001                | 515803         | 101              | 20                               | 9758            | 0.000                |
| 3                                       | 524109         | 199              | 38                               | 27499           | 0.001                | 524366         | 190              | 36                               | 27482           | 0.001                | 505725                                                              | 183              | 36                               | 6725            | 0.001                | 505944         | 186              | 37                               | 6718            | 0.001                |
| 4                                       | 496411         | 198              | 40                               | 25910           | 0.002                | 496694         | 154              | 31                               | 25906           | 0.001                | 498817                                                              | 182              | 36                               | 6952            | 0.001                | 499040         | 150              | 30                               | 6956            | 0.001                |
| 5                                       | 470303         | 204              | 43                               | 29775           | 0.002                | 470634         | 193              | 41                               | 29762           | 0.001                | 491683                                                              | 202              | 41                               | 12151           | 0.002                | 491934         | 195              | 40                               | 12156           | 0.001                |
| 6                                       | 440324         | 179              | 41                               | 26377           | 0.002                | 440679         | 165              | 37                               | 26374           | 0.002                | 479330                                                              | 173              | 36                               | 10183           | 0.002                | 479583         | 169              | 35                               | 10198           | 0.002                |
| 7                                       | 413768         | 190              | 46                               | 27743           | 0.003                | 414140         | 195              | 47                               | 27720           | 0.002                | 468974                                                              | 209              | 45                               | 12274           | 0.003                | 469216         | 203              | 43                               | 12267           | 0.002                |
| 8                                       | 385835         | 160              | 41                               | 26933           | 0.003                | 386225         | 171              | 44                               | 26928           | 0.003                | 456491                                                              | 174              | 38                               | 34306           | 0.003                | 456746         | 202              | 44                               | 34321           | 0.003                |
| 9                                       | 358742         | 133              | 37                               | 24410           | 0.004                | 359126         | 171              | 48                               | 24410           | 0.003                | 422011                                                              | 147              | 35                               | 30188           | 0.003                | 422223         | 208              | 49                               | 30198           | 0.003                |
| 10                                      | 334199         | 142              | 42                               | 19376           | 0.004                | 334545         | 130              | 39                               | 19351           | 0.004                | 391676                                                              | 154              | 39                               | 25231           | 0.004                | 391817         | 157              | 40                               | 25217           | 0.004                |
| 11                                      | 314681         | 140              | 44                               | 17079           | 0.005                | 315064         | 110              | 35                               | 17051           | 0.004                | 366291                                                              | 147              | 40                               | 22406           | 0.004                | 366443         | 122              | 33                               | 22392           | 0.004                |
| 12                                      | 297462         | 111              | 37                               | 18215           | 0.005                | 297903         | 97               | 33                               | 18190           | 0.004                | 343738                                                              | 123              | 36                               | 23460           | 0.005                | 343929         | 109              | 32                               | 23438           | 0.004                |
| 13                                      | 279136         | 151              | 54                               | 16323           | 0.005                | 279616         | 100              | 36                               | 16337           | 0.005                | 320155                                                              | 161              | 50                               | 21850           | 0.005                | 320382         | 117              | 37                               | 21837           | 0.005                |
| 14                                      | 262662         | 137              | 52                               | 14745           | 0.006                | 263179         | 85               | 32                               | 14731           | 0.005                | 298144                                                              | 139              | 47                               | 20166           | 0.006                | 298428         | 94               | 31                               | 20154           | 0.005                |
| 15                                      | 247780         | 126              | 51                               | 12511           | 0.006                | 248363         | 58               | 23                               | 12505           | 0.005                | 277839                                                              | 135              | 49                               | 16850           | 0.006                | 278180         | 68               | 24                               | 16821           | 0.005                |
| 16                                      | 235143         | 103              | 44                               | 11901           | 0.007                | 235800         | 42               | 18                               | 11902           | 0.005                | 260854                                                              | 107              | 41                               | 15216           | 0.006                | 261291         | 50               | 19                               | 15218           | 0.005                |
| 17                                      | 223139         | 79               | 35                               | 8813            | 0.007                | 223856         | 45               | 20                               | 8798            | 0.006                | 245531                                                              | 80               | 33                               | 11681           | 0.007                | 246023         | 49               | 20                               | 11675           | 0.005                |
| 18                                      | 214247         | 94               | 44                               | 8703            | 0.008                | 215013         | 33               | 15                               | 8687            | 0.006                | 233770                                                              | 97               | 41                               | 11008           | 0.007                | 234299         | 31               | 13                               | 10983           | 0.006                |
| 19                                      | 205450         | 101              | 49                               | 9774            | 0.008                | 206293         | 50               | 24                               | 9774            | 0.006                | 222665                                                              | 101              | 45                               | 11540           | 0.008                | 223285         | 53               | 24                               | 11538           | 0.006                |
| 20                                      | 195575         | 98               | 50                               | 7693            | 0.009                | 196469         | 36               | 18                               | 7693            | 0.006                | 211024                                                              | 106              | 50                               | 8989            | 0.008                | 211694         | 40               | 19                               | 8990            | 0.006                |
| 21                                      | 187784         | 85               | 45                               | 6342            | 0.009                | 188740         | 19               | 10                               | 6326            | 0.006                | 201929                                                              | 85               | 42                               | 7363            | 0.009                | 202664         | 23               | 11                               | 7351            | 0.006                |
| 22                                      | 181357         | 79               | 44                               | 6193            | 0.010                | 182395         | 19               | 10                               | 6188            | 0.006                | 194481                                                              | 85               | 44                               | 7156            | 0.009                | 195290         | 26               | 13                               | 7152            | 0.006                |
| 23                                      | 175085         | 54               | 31                               | 10105           | 0.010                | 176188         | 18               | 10                               | 10121           | 0.006                | 187240                                                              | 57               | 30                               | 10970           | 0.009                | 188112         | 20               | 11                               | 10965           | 0.006                |
| 24                                      | 164926         | 45               | 27                               | 13931           | 0.010                | 166049         | 21               | 13                               | 13957           | 0.007                | 176213                                                              | 55               | 31                               | 14483           | 0.010                | 177127         | 23               | 13                               | 14498           | 0.007                |
| 25                                      | 150950         | 48               | 32                               | 15830           | 0.010                | 152071         | 23               | 15                               | 15902           | 0.007                | 161675                                                              | 43               | 27                               | 16358           | 0.010                | 162606         | 23               | 14                               | 16417           | 0.007                |
| 26                                      | 135072         | 56               | 41                               | 16182           | 0.011                | 136146         | 16               | 12                               | 16266           | 0.007                | 145274                                                              | 60               | 41                               | 16544           | 0.010                | 146166         | 15               | 10                               | 16608           | 0.007                |
| 27                                      | 118834         | 36               | 30                               | 10556           | 0.011                | 119864         | 11               | 9                                | 10592           | 0.007                | 128670                                                              | 40               | 31                               | 10702           | 0.011                | 129543         | 13               | 10                               | 10740           | 0.007                |
| 28                                      | 108242         | 36               | 33                               | 11568           | 0.011                | 109261         | 15               | 14                               | 11602           | 0.007                | 117928                                                              | 38               | 32                               | 12090           | 0.011                | 118790         | 15               | 13                               | 12114           | 0.007                |
| 29                                      | 96638          | 27               | 28                               | 13639           | 0.012                | 97644          | 5                | 5                                | 13714           | 0.007                | 105800                                                              | 30               | 28                               | 14456           | 0.011                | 106661         | 6                | 6                                | 14526           | 0.007                |
| 30                                      | 82972          | 21               | 25                               | 12313           | 0.012                | 83925          | 5                | 6                                | 12398           | 0.007                | 91314                                                               | 21               | 23                               | 12924           | 0.011                | 92129          | 4                | 4                                | 12991           | 0.007                |
| 31                                      | 70638          | 27               | 38                               | 6806            | 0.012                | 71522          | 1                | 1                                | 6849            | 0.007                | 78369                                                               | 26               | 33                               | 7415            | 0.012                | 79134          | 1                | 1                                | 7447            | 0.007                |
| 32                                      | 63805          | 30               | 47                               | 5986            | 0.013                | 64672          | 2                | 3                                | 6046            | 0.007                | 70928                                                               | 29               | 41                               | 6597            | 0.012                | 71686          | 3                | 4                                | 6649            | 0.007                |

| Time (Days) | Main Analysis  |                  |                                  |                 |                      |                |                  |                                  |                 |                      | Sensitivity Analysis when Delaying Censoring of Vaccinated Controls |                  |                                  |                 |                      |                |                  |                                  |                 |                      |
|-------------|----------------|------------------|----------------------------------|-----------------|----------------------|----------------|------------------|----------------------------------|-----------------|----------------------|---------------------------------------------------------------------|------------------|----------------------------------|-----------------|----------------------|----------------|------------------|----------------------------------|-----------------|----------------------|
|             | Unvaccinated   |                  |                                  |                 |                      | Vaccinated     |                  |                                  |                 |                      | Unvaccinated                                                        |                  |                                  |                 |                      | Vaccinated     |                  |                                  |                 |                      |
|             | Number at Risk | Number of Events | Discrete Time Hazard per 100,000 | Number Censored | Cumulative Incidence | Number at Risk | Number of Events | Discrete Time Hazard per 100,000 | Number Censored | Cumulative Incidence | Number at Risk                                                      | Number of Events | Discrete Time Hazard per 100,000 | Number Censored | Cumulative Incidence | Number at Risk | Number of Events | Discrete Time Hazard per 100,000 | Number Censored | Cumulative Incidence |
| 33          | 57789          | 17               | 29                               | 10508           | 0.013                | 58624          | 0                | 0                                | 10633           | 0.007                | 64302                                                               | 20               | 31                               | 11508           | 0.012                | 65034          | 0                | 0                                | 11619           | 0.007                |
| 34          | 47264          | 16               | 34                               | 9594            | 0.013                | 47991          | 1                | 2                                | 9691            | 0.007                | 52774                                                               | 16               | 30                               | 10566           | 0.013                | 53415          | 1                | 2                                | 10640           | 0.007                |
| 35          | 37654          | 11               | 29                               | 10140           | 0.014                | 38299          | 0                | 0                                | 10303           | 0.007                | 42192                                                               | 12               | 28                               | 11111           | 0.013                | 42774          | 0                | 0                                | 11250           | 0.007                |
| 36          | 27503          | 9                | 33                               | 8387            | 0.014                | 27996          | 0                | 0                                | 8515            | 0.007                | 31069                                                               | 10               | 32                               | 9380            | 0.013                | 31524          | 0                | 0                                | 9497            | 0.007                |
| 37          | 19107          | 3                | 16                               | 5820            | 0.014                | 19481          | 0                | 0                                | 5932            | 0.007                | 21679                                                               | 4                | 18                               | 6500            | 0.014                | 22027          | 0                | 0                                | 6602            | 0.007                |
| 38          | 13284          | 3                | 23                               | 1796            | 0.014                | 13549          | 1                | 7                                | 1831            | 0.007                | 15175                                                               | 3                | 20                               | 2053            | 0.014                | 15425          | 1                | 6                                | 2085            | 0.007                |
| 39          | 11485          | 1                | 9                                | 1845            | 0.015                | 11717          | 1                | 9                                | 1881            | 0.007                | 13119                                                               | 3                | 23                               | 2102            | 0.014                | 13339          | 1                | 7                                | 2132            | 0.007                |
| 40          | 9639           | 4                | 41                               | 2901            | 0.015                | 9835           | 0                | 0                                | 2959            | 0.007                | 11014                                                               | 4                | 36                               | 3340            | 0.014                | 11206          | 0                | 0                                | 3399            | 0.007                |
| 41          | 6734           | 3                | 45                               | 2527            | 0.015                | 6876           | 0                | 0                                | 2588            | 0.007                | 7670                                                                | 3                | 39                               | 2875            | 0.015                | 7807           | 0                | 0                                | 2932            | 0.007                |
| 42          | 4204           | 2                | 48                               | 2132            | 0.016                | 4288           | 0                | 0                                | 2179            | 0.007                | 4792                                                                | 2                | 42                               | 2397            | 0.015                | 4875           | 0                | 0                                | 2445            | 0.007                |
| 43          | 2070           | 0                | 0                                | 1556            | 0.016                | 2109           | 0                | 0                                | 1584            | 0.007                | 2393                                                                | 0                | 0                                | 1774            | 0.015                | 2430           | 0                | 0                                | 1800            | 0.007                |
| 44          | 514            | 0                | 0                                | 514             | 0.016                | 525            | 0                | 0                                | 525             | 0.007                | 619                                                                 | 0                | 0                                | 619             | 0.015                | 630            | 0                | 0                                | 630             | 0.007                |

**COVID-19 Hospitalization**

|    |        |    |   |       |       |        |    |   |       |       |        |    |   |       |       |        |    |   |       |       |
|----|--------|----|---|-------|-------|--------|----|---|-------|-------|--------|----|---|-------|-------|--------|----|---|-------|-------|
| 1  | 596618 | 6  | 1 | 39288 | 0.000 | 596618 | 0  | 0 | 39281 | 0.000 | 526877 | 5  | 1 | 10993 | 0.000 | 526877 | 0  | 0 | 10988 | 0.000 |
| 2  | 557324 | 8  | 1 | 32778 | 0.000 | 557337 | 0  | 0 | 32774 | 0.000 | 515879 | 8  | 2 | 9764  | 0.000 | 515889 | 0  | 0 | 9760  | 0.000 |
| 3  | 524538 | 3  | 1 | 27509 | 0.000 | 524563 | 2  | 0 | 27498 | 0.000 | 506107 | 3  | 1 | 6729  | 0.000 | 506129 | 2  | 0 | 6720  | 0.000 |
| 4  | 497026 | 3  | 1 | 25926 | 0.000 | 497063 | 7  | 1 | 25922 | 0.000 | 499375 | 4  | 1 | 6962  | 0.000 | 499407 | 9  | 2 | 6960  | 0.000 |
| 5  | 471097 | 17 | 4 | 29797 | 0.000 | 471134 | 3  | 1 | 29796 | 0.000 | 492409 | 13 | 3 | 12166 | 0.000 | 492438 | 4  | 1 | 12164 | 0.000 |
| 6  | 441283 | 7  | 2 | 26411 | 0.000 | 441335 | 11 | 2 | 26408 | 0.000 | 480230 | 6  | 1 | 10208 | 0.000 | 480270 | 10 | 2 | 10206 | 0.000 |
| 7  | 414865 | 14 | 3 | 27780 | 0.000 | 414916 | 8  | 2 | 27775 | 0.000 | 470016 | 16 | 3 | 12299 | 0.000 | 470054 | 14 | 3 | 12297 | 0.000 |
| 8  | 387071 | 14 | 4 | 26988 | 0.000 | 387133 | 6  | 2 | 26985 | 0.000 | 457701 | 13 | 3 | 14208 | 0.000 | 457743 | 10 | 2 | 14207 | 0.000 |
| 9  | 360069 | 5  | 1 | 24470 | 0.000 | 360142 | 7  | 2 | 24465 | 0.000 | 443480 | 7  | 2 | 33764 | 0.000 | 443526 | 7  | 2 | 33764 | 0.000 |
| 10 | 335594 | 10 | 3 | 19404 | 0.000 | 335670 | 2  | 1 | 19401 | 0.000 | 409709 | 8  | 2 | 26725 | 0.000 | 409755 | 3  | 1 | 26722 | 0.000 |
| 11 | 316180 | 7  | 2 | 17100 | 0.000 | 316267 | 6  | 2 | 17097 | 0.000 | 382976 | 7  | 2 | 23650 | 0.000 | 383030 | 5  | 1 | 23645 | 0.000 |
| 12 | 299073 | 11 | 4 | 18275 | 0.000 | 299164 | 11 | 4 | 18270 | 0.000 | 359319 | 13 | 4 | 24732 | 0.000 | 359380 | 14 | 4 | 24727 | 0.000 |
| 13 | 280787 | 10 | 4 | 16400 | 0.000 | 280883 | 8  | 3 | 16393 | 0.000 | 334574 | 8  | 2 | 22625 | 0.000 | 334639 | 14 | 4 | 22617 | 0.000 |
| 14 | 264377 | 10 | 4 | 14802 | 0.000 | 264482 | 6  | 2 | 14798 | 0.000 | 311941 | 9  | 3 | 20560 | 0.000 | 312008 | 8  | 3 | 20551 | 0.000 |
| 15 | 249565 | 11 | 4 | 12571 | 0.000 | 249678 | 5  | 2 | 12566 | 0.000 | 291372 | 12 | 4 | 18913 | 0.000 | 291449 | 8  | 3 | 18910 | 0.000 |
| 16 | 236983 | 8  | 3 | 11970 | 0.000 | 237107 | 2  | 1 | 11969 | 0.000 | 272447 | 8  | 3 | 16706 | 0.000 | 272531 | 5  | 2 | 16703 | 0.000 |
| 17 | 225005 | 13 | 6 | 8847  | 0.000 | 225136 | 5  | 2 | 8845  | 0.000 | 255733 | 12 | 5 | 12540 | 0.000 | 255823 | 5  | 2 | 12532 | 0.000 |
| 18 | 216145 | 8  | 4 | 8738  | 0.001 | 216286 | 2  | 1 | 8739  | 0.000 | 243181 | 13 | 5 | 11875 | 0.000 | 243286 | 2  | 1 | 11872 | 0.000 |
| 19 | 207399 | 8  | 4 | 9834  | 0.001 | 207545 | 2  | 1 | 9834  | 0.000 | 231293 | 9  | 4 | 12520 | 0.000 | 231412 | 2  | 1 | 12523 | 0.000 |
| 20 | 197557 | 14 | 7 | 7735  | 0.001 | 197709 | 1  | 1 | 7736  | 0.000 | 218764 | 15 | 7 | 9696  | 0.001 | 218887 | 4  | 2 | 9691  | 0.000 |

| Time (Days)            | Main Analysis  |                  |                                  |                 |                      |                |                  |                                  |                 |                      | Sensitivity Analysis when Delaying Censoring of Vaccinated Controls |                  |                                  |                 |                      |                |                  |                                  |                 |                      |
|------------------------|----------------|------------------|----------------------------------|-----------------|----------------------|----------------|------------------|----------------------------------|-----------------|----------------------|---------------------------------------------------------------------|------------------|----------------------------------|-----------------|----------------------|----------------|------------------|----------------------------------|-----------------|----------------------|
|                        | Unvaccinated   |                  |                                  |                 |                      | Vaccinated     |                  |                                  |                 |                      | Unvaccinated                                                        |                  |                                  |                 |                      | Vaccinated     |                  |                                  |                 |                      |
|                        | Number at Risk | Number of Events | Discrete Time Hazard per 100,000 | Number Censored | Cumulative Incidence | Number at Risk | Number of Events | Discrete Time Hazard per 100,000 | Number Censored | Cumulative Incidence | Number at Risk                                                      | Number of Events | Discrete Time Hazard per 100,000 | Number Censored | Cumulative Incidence | Number at Risk | Number of Events | Discrete Time Hazard per 100,000 | Number Censored | Cumulative Incidence |
| 21                     | 189808         | 11               | 6                                | 6369            | 0.001                | 189972         | 4                | 2                                | 6365            | 0.000                | 209053                                                              | 9                | 4                                | 7601            | 0.001                | 209192         | 4                | 2                                | 7595            | 0.000                |
| 22                     | 183428         | 10               | 5                                | 6226            | 0.001                | 183603         | 0                | 0                                | 6226            | 0.000                | 201443                                                              | 15               | 7                                | 7971            | 0.001                | 201593         | 1                | 0                                | 7973            | 0.000                |
| 23                     | 177192         | 8                | 5                                | 10195           | 0.001                | 177377         | 1                | 1                                | 10196           | 0.000                | 193457                                                              | 6                | 3                                | 11401           | 0.001                | 193619         | 0                | 0                                | 11402           | 0.000                |
| 24                     | 166989         | 6                | 4                                | 14049           | 0.001                | 167180         | 2                | 1                                | 14053           | 0.000                | 182050                                                              | 6                | 3                                | 15075           | 0.001                | 182217         | 2                | 1                                | 15074           | 0.000                |
| 25                     | 152934         | 7                | 5                                | 16003           | 0.001                | 153125         | 2                | 1                                | 16010           | 0.000                | 166969                                                              | 5                | 3                                | 16960           | 0.001                | 167141         | 2                | 1                                | 16963           | 0.000                |
| 26                     | 136924         | 9                | 7                                | 16376           | 0.001                | 137113         | 3                | 2                                | 16388           | 0.000                | 150004                                                              | 8                | 5                                | 17087           | 0.001                | 150176         | 3                | 2                                | 17098           | 0.000                |
| 27                     | 120539         | 5                | 4                                | 10667           | 0.001                | 120722         | 1                | 1                                | 10667           | 0.000                | 132909                                                              | 6                | 5                                | 10975           | 0.001                | 133075         | 1                | 1                                | 10976           | 0.000                |
| 28                     | 109867         | 1                | 1                                | 11690           | 0.001                | 110054         | 1                | 1                                | 11691           | 0.000                | 121928                                                              | 2                | 2                                | 12217           | 0.001                | 122098         | 1                | 1                                | 12222           | 0.000                |
| 29                     | 98176          | 3                | 3                                | 13823           | 0.001                | 98362          | 0                | 0                                | 13833           | 0.000                | 109709                                                              | 2                | 2                                | 15186           | 0.001                | 109875         | 0                | 0                                | 15193           | 0.000                |
| 30                     | 84350          | 0                | 0                                | 12493           | 0.001                | 84529          | 0                | 0                                | 12502           | 0.000                | 94521                                                               | 0                | 0                                | 13431           | 0.001                | 94682          | 0                | 0                                | 13439           | 0.000                |
| 31                     | 71857          | 3                | 4                                | 6895            | 0.001                | 72027          | 0                | 0                                | 6902            | 0.000                | 81090                                                               | 3                | 4                                | 7586            | 0.001                | 81243          | 0                | 0                                | 7594            | 0.000                |
| 32                     | 64959          | 1                | 2                                | 6079            | 0.001                | 65125          | 2                | 3                                | 6085            | 0.000                | 73501                                                               | 2                | 3                                | 6735            | 0.001                | 73649          | 2                | 3                                | 6740            | 0.000                |
| 33                     | 58879          | 4                | 7                                | 10690           | 0.001                | 59038          | 0                | 0                                | 10709           | 0.000                | 66764                                                               | 4                | 6                                | 11844           | 0.001                | 66907          | 0                | 0                                | 11860           | 0.000                |
| 34                     | 48185          | 1                | 2                                | 9752            | 0.001                | 48329          | 0                | 0                                | 9768            | 0.000                | 54916                                                               | 1                | 2                                | 10905           | 0.001                | 55047          | 0                | 0                                | 10917           | 0.000                |
| 35                     | 38432          | 0                | 0                                | 10355           | 0.001                | 38561          | 0                | 0                                | 10380           | 0.000                | 44010                                                               | 1                | 2                                | 11632           | 0.001                | 44130          | 0                | 0                                | 11652           | 0.000                |
| 36                     | 28077          | 2                | 7                                | 8551            | 0.001                | 28181          | 0                | 0                                | 8581            | 0.000                | 32377                                                               | 2                | 6                                | 9749            | 0.001                | 32478          | 0                | 0                                | 9779            | 0.000                |
| 37                     | 19524          | 1                | 5                                | 5945            | 0.001                | 19600          | 0                | 0                                | 5971            | 0.000                | 22626                                                               | 1                | 4                                | 6819            | 0.001                | 22699          | 0                | 0                                | 6843            | 0.000                |
| 38                     | 13578          | 0                | 0                                | 1831            | 0.001                | 13629          | 0                | 0                                | 1838            | 0.000                | 15806                                                               | 0                | 0                                | 2127            | 0.001                | 15856          | 0                | 0                                | 2134            | 0.000                |
| 39                     | 11747          | 0                | 0                                | 1886            | 0.001                | 11791          | 0                | 0                                | 1892            | 0.000                | 13679                                                               | 0                | 0                                | 2185            | 0.001                | 13722          | 0                | 0                                | 2189            | 0.000                |
| 40                     | 9861           | 0                | 0                                | 2962            | 0.001                | 9899           | 0                | 0                                | 2977            | 0.000                | 11494                                                               | 0                | 0                                | 3470            | 0.001                | 11533          | 0                | 0                                | 3486            | 0.000                |
| 41                     | 6899           | 0                | 0                                | 2590            | 0.001                | 6922           | 0                | 0                                | 2601            | 0.000                | 8024                                                                | 0                | 0                                | 2992            | 0.001                | 8047           | 0                | 0                                | 3003            | 0.000                |
| 42                     | 4309           | 0                | 0                                | 2187            | 0.001                | 4321           | 0                | 0                                | 2197            | 0.000                | 5032                                                                | 0                | 0                                | 2527            | 0.001                | 5044           | 0                | 0                                | 2537            | 0.000                |
| 43                     | 2122           | 0                | 0                                | 1594            | 0.001                | 2124           | 0                | 0                                | 1596            | 0.000                | 2505                                                                | 0                | 0                                | 1860            | 0.001                | 2507           | 0                | 0                                | 1862            | 0.000                |
| 44                     | 528            | 0                | 0                                | 528             | 0.001                | 528            | 0                | 0                                | 528             | 0.000                | 645                                                                 | 0                | 0                                | 645             | 0.001                | 645            | 0                | 0                                | 645             | 0.000                |
| <b>Severe COVID-19</b> |                |                  |                                  |                 |                      |                |                  |                                  |                 |                      |                                                                     |                  |                                  |                 |                      |                |                  |                                  |                 |                      |
| 1                      | 596618         | 0                | 0                                | 39288           | 0.000                | 596618         | 0                | 0                                | 39281           | 0.000                | 526877                                                              | 0                | 0                                | 10993           | 0.000                | 526877         | 0                | 0                                | 10988           | 0.000                |
| 2                      | 557330         | 0                | 0                                | 32778           | 0.000                | 557337         | 0                | 0                                | 32774           | 0.000                | 515884                                                              | 0                | 0                                | 9764            | 0.000                | 515889         | 0                | 0                                | 9760            | 0.000                |
| 3                      | 524552         | 1                | 0                                | 27509           | 0.000                | 524563         | 0                | 0                                | 27498           | 0.000                | 506120                                                              | 1                | 0                                | 6729            | 0.000                | 506129         | 0                | 0                                | 6720            | 0.000                |
| 4                      | 497042         | 5                | 1                                | 25926           | 0.000                | 497065         | 0                | 0                                | 25922           | 0.000                | 499390                                                              | 5                | 1                                | 6962            | 0.000                | 499409         | 1                | 0                                | 6960            | 0.000                |
| 5                      | 471111         | 1                | 0                                | 29797           | 0.000                | 471143         | 0                | 0                                | 29796           | 0.000                | 492423                                                              | 1                | 0                                | 12166           | 0.000                | 492448         | 0                | 0                                | 12164           | 0.000                |
| 6                      | 441313         | 4                | 1                                | 26411           | 0.000                | 441347         | 5                | 1                                | 26409           | 0.000                | 480256                                                              | 5                | 1                                | 10208           | 0.000                | 480284         | 6                | 1                                | 10206           | 0.000                |
| 7                      | 414898         | 6                | 1                                | 27781           | 0.000                | 414933         | 1                | 0                                | 27778           | 0.000                | 470043                                                              | 4                | 1                                | 12299           | 0.000                | 470072         | 2                | 0                                | 12297           | 0.000                |
| 8                      | 387111         | 7                | 2                                | 26988           | 0.000                | 387154         | 6                | 2                                | 26986           | 0.000                | 457740                                                              | 5                | 1                                | 14208           | 0.000                | 457773         | 6                | 1                                | 14207           | 0.000                |

| Time (Days) | Main Analysis  |                  |                                  |                 |                      |                |                  |                                  |                 |                      | Sensitivity Analysis when Delaying Censoring of Vaccinated Controls |                  |                                  |                 |                      |                |                  |                                  |                 |                      |
|-------------|----------------|------------------|----------------------------------|-----------------|----------------------|----------------|------------------|----------------------------------|-----------------|----------------------|---------------------------------------------------------------------|------------------|----------------------------------|-----------------|----------------------|----------------|------------------|----------------------------------|-----------------|----------------------|
|             | Unvaccinated   |                  |                                  |                 |                      | Vaccinated     |                  |                                  |                 |                      | Unvaccinated                                                        |                  |                                  |                 |                      | Vaccinated     |                  |                                  |                 |                      |
|             | Number at Risk | Number of Events | Discrete Time Hazard per 100,000 | Number Censored | Cumulative Incidence | Number at Risk | Number of Events | Discrete Time Hazard per 100,000 | Number Censored | Cumulative Incidence | Number at Risk                                                      | Number of Events | Discrete Time Hazard per 100,000 | Number Censored | Cumulative Incidence | Number at Risk | Number of Events | Discrete Time Hazard per 100,000 | Number Censored | Cumulative Incidence |
| 9           | 360116         | 6                | 2                                | 24473           | 0.000                | 360162         | 2                | 1                                | 24468           | 0.000                | 443527                                                              | 6                | 1                                | 14087           | 0.000                | 443560         | 3                | 1                                | 14083           | 0.000                |
| 10          | 335637         | 5                | 1                                | 19405           | 0.000                | 335692         | 4                | 1                                | 19401           | 0.000                | 429434                                                              | 7                | 2                                | 10735           | 0.000                | 429474         | 7                | 2                                | 10733           | 0.000                |
| 11          | 316227         | 9                | 3                                | 17100           | 0.000                | 316287         | 4                | 1                                | 17097           | 0.000                | 418692                                                              | 6                | 1                                | 9052            | 0.000                | 418734         | 5                | 1                                | 9048            | 0.000                |
| 12          | 299118         | 4                | 1                                | 18275           | 0.000                | 299186         | 1                | 0                                | 18271           | 0.000                | 409634                                                              | 6                | 1                                | 11731           | 0.000                | 409681         | 3                | 1                                | 11724           | 0.000                |
| 13          | 280839         | 2                | 1                                | 16400           | 0.000                | 280914         | 2                | 1                                | 16396           | 0.000                | 397897                                                              | 1                | 0                                | 29552           | 0.000                | 397954         | 5                | 1                                | 29550           | 0.000                |
| 14          | 264437         | 7                | 3                                | 14804           | 0.000                | 264516         | 1                | 0                                | 14798           | 0.000                | 368344                                                              | 8                | 2                                | 24873           | 0.000                | 368399         | 7                | 2                                | 24868           | 0.000                |
| 15          | 249626         | 12               | 5                                | 12573           | 0.000                | 249717         | 5                | 2                                | 12569           | 0.000                | 343463                                                              | 11               | 3                                | 22171           | 0.000                | 343524         | 8                | 2                                | 22167           | 0.000                |
| 16          | 237041         | 9                | 4                                | 11971           | 0.000                | 237143         | 5                | 2                                | 11969           | 0.000                | 321281                                                              | 10               | 3                                | 20613           | 0.000                | 321349         | 5                | 2                                | 20616           | 0.000                |
| 17          | 225061         | 10               | 4                                | 8848            | 0.000                | 225169         | 1                | 0                                | 8848            | 0.000                | 300658                                                              | 11               | 4                                | 16690           | 0.000                | 300728         | 3                | 1                                | 16686           | 0.000                |
| 18          | 216203         | 9                | 4                                | 8738            | 0.000                | 216320         | 1                | 0                                | 8739            | 0.000                | 283957                                                              | 9                | 3                                | 16113           | 0.000                | 284039         | 4                | 1                                | 16110           | 0.000                |
| 19          | 207456         | 4                | 2                                | 9836            | 0.000                | 207580         | 2                | 1                                | 9837            | 0.000                | 267835                                                              | 8                | 3                                | 17518           | 0.000                | 267925         | 5                | 2                                | 17519           | 0.000                |
| 20          | 197616         | 7                | 4                                | 7735            | 0.000                | 197741         | 5                | 3                                | 7736            | 0.000                | 250309                                                              | 9                | 4                                | 13493           | 0.000                | 250401         | 6                | 2                                | 13485           | 0.000                |
| 21          | 189874         | 6                | 3                                | 6370            | 0.000                | 190000         | 0                | 0                                | 6366            | 0.000                | 236807                                                              | 7                | 3                                | 10611           | 0.000                | 236910         | 3                | 1                                | 10606           | 0.000                |
| 22          | 183498         | 7                | 4                                | 6228            | 0.000                | 183634         | 3                | 2                                | 6227            | 0.000                | 226189                                                              | 7                | 3                                | 10551           | 0.000                | 226301         | 3                | 1                                | 10551           | 0.000                |
| 23          | 177263         | 6                | 3                                | 10197           | 0.000                | 177404         | 1                | 1                                | 10198           | 0.000                | 215631                                                              | 7                | 3                                | 14295           | 0.000                | 215747         | 0                | 0                                | 14295           | 0.000                |
| 24          | 167060         | 9                | 5                                | 14052           | 0.001                | 167205         | 1                | 1                                | 14054           | 0.000                | 201329                                                              | 8                | 4                                | 17925           | 0.000                | 201452         | 3                | 1                                | 17926           | 0.000                |
| 25          | 152999         | 7                | 5                                | 16007           | 0.001                | 153150         | 0                | 0                                | 16012           | 0.000                | 183396                                                              | 8                | 4                                | 19497           | 0.001                | 183523         | 0                | 0                                | 19497           | 0.000                |
| 26          | 136985         | 5                | 4                                | 16380           | 0.001                | 137138         | 0                | 0                                | 16390           | 0.000                | 163891                                                              | 4                | 2                                | 19476           | 0.001                | 164026         | 0                | 0                                | 19483           | 0.000                |
| 27          | 120600         | 3                | 2                                | 10668           | 0.001                | 120748         | 2                | 2                                | 10670           | 0.000                | 144411                                                              | 2                | 1                                | 12247           | 0.001                | 144543         | 2                | 1                                | 12251           | 0.000                |
| 28          | 109929         | 6                | 5                                | 11690           | 0.001                | 110076         | 0                | 0                                | 11695           | 0.000                | 132162                                                              | 5                | 4                                | 13521           | 0.001                | 132290         | 0                | 0                                | 13525           | 0.000                |
| 29          | 98233          | 3                | 3                                | 13827           | 0.001                | 98381          | 1                | 1                                | 13837           | 0.000                | 118636                                                              | 3                | 3                                | 16285           | 0.001                | 118765         | 1                | 1                                | 16293           | 0.000                |
| 30          | 84403          | 4                | 5                                | 12495           | 0.001                | 84543          | 2                | 2                                | 12502           | 0.000                | 102348                                                              | 4                | 4                                | 14454           | 0.001                | 102471         | 2                | 2                                | 14460           | 0.000                |
| 31          | 71904          | 0                | 0                                | 6897            | 0.001                | 72039          | 0                | 0                                | 6902            | 0.000                | 87890                                                               | 0                | 0                                | 8394            | 0.001                | 88009          | 0                | 0                                | 8400            | 0.000                |
| 32          | 65007          | 1                | 2                                | 6080            | 0.001                | 65137          | 0                | 0                                | 6087            | 0.000                | 79496                                                               | 1                | 1                                | 7307            | 0.001                | 79609          | 0                | 0                                | 7313            | 0.000                |
| 33          | 58926          | 2                | 3                                | 10699           | 0.001                | 59050          | 0                | 0                                | 10711           | 0.000                | 72188                                                               | 2                | 3                                | 12949           | 0.001                | 72296          | 0                | 0                                | 12957           | 0.000                |
| 34          | 48225          | 4                | 8                                | 9754            | 0.001                | 48339          | 0                | 0                                | 9768            | 0.000                | 59237                                                               | 4                | 7                                | 11672           | 0.001                | 59339          | 0                | 0                                | 11683           | 0.000                |
| 35          | 38467          | 0                | 0                                | 10366           | 0.001                | 38571          | 0                | 0                                | 10382           | 0.000                | 47561                                                               | 0                | 0                                | 12459           | 0.001                | 47656          | 0                | 0                                | 12471           | 0.000                |
| 36          | 28101          | 0                | 0                                | 8556            | 0.001                | 28189          | 0                | 0                                | 8586            | 0.000                | 35102                                                               | 0                | 0                                | 10507           | 0.001                | 35185          | 0                | 0                                | 10536           | 0.000                |
| 37          | 19545          | 2                | 10                               | 5952            | 0.001                | 19603          | 0                | 0                                | 5972            | 0.000                | 24595                                                               | 2                | 8                                | 7391            | 0.001                | 24649          | 0                | 0                                | 7409            | 0.000                |
| 38          | 13591          | 0                | 0                                | 1832            | 0.001                | 13631          | 0                | 0                                | 1838            | 0.000                | 17202                                                               | 0                | 0                                | 2293            | 0.001                | 17240          | 0                | 0                                | 2299            | 0.000                |
| 39          | 11759          | 1                | 9                                | 1886            | 0.001                | 11793          | 0                | 0                                | 1893            | 0.000                | 14909                                                               | 1                | 7                                | 2370            | 0.001                | 14941          | 0                | 0                                | 2375            | 0.000                |
| 40          | 9872           | 0                | 0                                | 2968            | 0.001                | 9900           | 0                | 0                                | 2977            | 0.000                | 12538                                                               | 0                | 0                                | 3799            | 0.001                | 12566          | 0                | 0                                | 3808            | 0.000                |
| 41          | 6904           | 0                | 0                                | 2594            | 0.001                | 6923           | 0                | 0                                | 2601            | 0.000                | 8739                                                                | 0                | 0                                | 3265            | 0.001                | 8758           | 0                | 0                                | 3272            | 0.000                |

| Time (Days)                  | Main Analysis  |                  |                                  |                 |                      |                |                  |                                  |                 |                      | Sensitivity Analysis when Delaying Censoring of Vaccinated Controls |                  |                                  |                 |                      |                |                  |                                  |                 |                      |
|------------------------------|----------------|------------------|----------------------------------|-----------------|----------------------|----------------|------------------|----------------------------------|-----------------|----------------------|---------------------------------------------------------------------|------------------|----------------------------------|-----------------|----------------------|----------------|------------------|----------------------------------|-----------------|----------------------|
|                              | Unvaccinated   |                  |                                  |                 |                      | Vaccinated     |                  |                                  |                 |                      | Unvaccinated                                                        |                  |                                  |                 |                      | Vaccinated     |                  |                                  |                 |                      |
|                              | Number at Risk | Number of Events | Discrete Time Hazard per 100,000 | Number Censored | Cumulative Incidence | Number at Risk | Number of Events | Discrete Time Hazard per 100,000 | Number Censored | Cumulative Incidence | Number at Risk                                                      | Number of Events | Discrete Time Hazard per 100,000 | Number Censored | Cumulative Incidence | Number at Risk | Number of Events | Discrete Time Hazard per 100,000 | Number Censored | Cumulative Incidence |
| 42                           | 4310           | 0                | 0                                | 2188            | 0.001                | 4322           | 0                | 0                                | 2197            | 0.000                | 5474                                                                | 0                | 0                                | 2748            | 0.001                | 5486           | 0                | 0                                | 2757            | 0.000                |
| 43                           | 2122           | 0                | 0                                | 1594            | 0.001                | 2125           | 0                | 0                                | 1597            | 0.000                | 2726                                                                | 0                | 0                                | 2017            | 0.001                | 2729           | 0                | 0                                | 2020            | 0.000                |
| 44                           | 528            | 0                | 0                                | 528             | 0.001                | 528            | 0                | 0                                | 528             | 0.000                | 709                                                                 | 0                | 0                                | 709             | 0.001                | 709            | 0                | 0                                | 709             | 0.000                |
| <b>Death due to COVID-19</b> |                |                  |                                  |                 |                      |                |                  |                                  |                 |                      |                                                                     |                  |                                  |                 |                      |                |                  |                                  |                 |                      |
| 1                            | 596618         | 0                | 0                                | 39288           | 0.000                | 596618         | 0                | 0                                | 39281           | 0.000                | 526877                                                              | 0                | 0                                | 10993           | 0.000                | 526877         | 0                | 0                                | 10988           | 0.000                |
| 2                            | 557330         | 0                | 0                                | 32778           | 0.000                | 557337         | 0                | 0                                | 32774           | 0.000                | 515884                                                              | 0                | 0                                | 9764            | 0.000                | 515889         | 0                | 0                                | 9760            | 0.000                |
| 3                            | 524552         | 0                | 0                                | 27509           | 0.000                | 524563         | 0                | 0                                | 27498           | 0.000                | 506120                                                              | 0                | 0                                | 6729            | 0.000                | 506129         | 0                | 0                                | 6720            | 0.000                |
| 4                            | 497043         | 0                | 0                                | 25926           | 0.000                | 497065         | 0                | 0                                | 25922           | 0.000                | 499391                                                              | 0                | 0                                | 6962            | 0.000                | 499409         | 0                | 0                                | 6960            | 0.000                |
| 5                            | 471117         | 0                | 0                                | 29797           | 0.000                | 471143         | 0                | 0                                | 29796           | 0.000                | 492429                                                              | 0                | 0                                | 12166           | 0.000                | 492449         | 0                | 0                                | 12164           | 0.000                |
| 6                            | 441320         | 0                | 0                                | 26411           | 0.000                | 441347         | 0                | 0                                | 26409           | 0.000                | 480263                                                              | 0                | 0                                | 10208           | 0.000                | 480285         | 0                | 0                                | 10206           | 0.000                |
| 7                            | 414909         | 1                | 0                                | 27781           | 0.000                | 414938         | 0                | 0                                | 27778           | 0.000                | 470055                                                              | 1                | 0                                | 12299           | 0.000                | 470079         | 0                | 0                                | 12297           | 0.000                |
| 8                            | 387127         | 0                | 0                                | 26988           | 0.000                | 387160         | 0                | 0                                | 26987           | 0.000                | 457755                                                              | 0                | 0                                | 14208           | 0.000                | 457782         | 0                | 0                                | 14208           | 0.000                |
| 9                            | 360139         | 2                | 1                                | 24474           | 0.000                | 360173         | 0                | 0                                | 24468           | 0.000                | 443547                                                              | 2                | 0                                | 14087           | 0.000                | 443574         | 1                | 0                                | 14083           | 0.000                |
| 10                           | 335663         | 0                | 0                                | 19406           | 0.000                | 335705         | 0                | 0                                | 19401           | 0.000                | 429458                                                              | 0                | 0                                | 10736           | 0.000                | 429490         | 0                | 0                                | 10733           | 0.000                |
| 11                           | 316257         | 1                | 0                                | 17100           | 0.000                | 316304         | 1                | 0                                | 17097           | 0.000                | 418722                                                              | 0                | 0                                | 9052            | 0.000                | 418757         | 1                | 0                                | 9048            | 0.000                |
| 12                           | 299156         | 1                | 0                                | 18276           | 0.000                | 299206         | 0                | 0                                | 18271           | 0.000                | 409670                                                              | 2                | 0                                | 11732           | 0.000                | 409708         | 0                | 0                                | 11724           | 0.000                |
| 13                           | 280879         | 0                | 0                                | 16400           | 0.000                | 280935         | 0                | 0                                | 16397           | 0.000                | 397936                                                              | 1                | 0                                | 11118           | 0.000                | 397984         | 0                | 0                                | 11115           | 0.000                |
| 14                           | 264479         | 1                | 0                                | 14804           | 0.000                | 264538         | 1                | 0                                | 14800           | 0.000                | 386817                                                              | 1                | 0                                | 9695            | 0.000                | 386869         | 1                | 0                                | 9691            | 0.000                |
| 15                           | 249674         | 1                | 0                                | 12575           | 0.000                | 249737         | 0                | 0                                | 12570           | 0.000                | 377121                                                              | 1                | 0                                | 8353            | 0.000                | 377177         | 3                | 1                                | 8350            | 0.000                |
| 16                           | 237098         | 3                | 1                                | 11973           | 0.000                | 237167         | 2                | 1                                | 11970           | 0.000                | 368767                                                              | 4                | 1                                | 8323            | 0.000                | 368824         | 2                | 1                                | 8321            | 0.000                |
| 17                           | 225122         | 0                | 0                                | 8851            | 0.000                | 225195         | 0                | 0                                | 8848            | 0.000                | 360440                                                              | 0                | 0                                | 5231            | 0.000                | 360501         | 0                | 0                                | 5229            | 0.000                |
| 18                           | 216271         | 0                | 0                                | 8740            | 0.000                | 216347         | 1                | 0                                | 8740            | 0.000                | 355209                                                              | 1                | 0                                | 5169            | 0.000                | 355272         | 1                | 0                                | 5169            | 0.000                |
| 19                           | 207531         | 3                | 1                                | 9837            | 0.000                | 207606         | 0                | 0                                | 9837            | 0.000                | 350039                                                              | 3                | 1                                | 24537           | 0.000                | 350102         | 0                | 0                                | 24540           | 0.000                |
| 20                           | 197691         | 3                | 2                                | 7738            | 0.000                | 197769         | 0                | 0                                | 7737            | 0.000                | 325499                                                              | 3                | 1                                | 19439           | 0.000                | 325562         | 1                | 0                                | 19438           | 0.000                |
| 21                           | 189950         | 0                | 0                                | 6370            | 0.000                | 190032         | 0                | 0                                | 6368            | 0.000                | 306057                                                              | 1                | 0                                | 16460           | 0.000                | 306123         | 1                | 0                                | 16459           | 0.000                |
| 22                           | 183580         | 2                | 1                                | 6229            | 0.000                | 183664         | 0                | 0                                | 6228            | 0.000                | 289596                                                              | 2                | 1                                | 16199           | 0.000                | 289663         | 0                | 0                                | 16199           | 0.000                |
| 23                           | 177349         | 2                | 1                                | 10199           | 0.000                | 177436         | 1                | 1                                | 10199           | 0.000                | 273395                                                              | 2                | 1                                | 20397           | 0.000                | 273464         | 2                | 1                                | 20397           | 0.000                |
| 24                           | 167148         | 1                | 1                                | 14057           | 0.000                | 167236         | 1                | 1                                | 14058           | 0.000                | 252996                                                              | 2                | 1                                | 25016           | 0.000                | 253065         | 2                | 1                                | 25017           | 0.000                |
| 25                           | 153090         | 1                | 1                                | 16012           | 0.000                | 153177         | 0                | 0                                | 16013           | 0.000                | 227978                                                              | 1                | 0                                | 27309           | 0.000                | 228046         | 0                | 0                                | 27310           | 0.000                |
| 26                           | 137077         | 3                | 2                                | 16391           | 0.000                | 137164         | 0                | 0                                | 16392           | 0.000                | 200668                                                              | 3                | 1                                | 25815           | 0.000                | 200736         | 1                | 0                                | 25812           | 0.000                |
| 27                           | 120683         | 2                | 2                                | 10673           | 0.000                | 120772         | 0                | 0                                | 10671           | 0.000                | 174850                                                              | 2                | 1                                | 17155           | 0.000                | 174923         | 0                | 0                                | 17154           | 0.000                |
| 28                           | 110008         | 0                | 0                                | 11698           | 0.000                | 110101         | 0                | 0                                | 11699           | 0.000                | 157693                                                              | 0                | 0                                | 17984           | 0.000                | 157769         | 1                | 1                                | 17984           | 0.000                |
| 29                           | 98310          | 1                | 1                                | 13842           | 0.000                | 98402          | 0                | 0                                | 13841           | 0.000                | 139709                                                              | 1                | 1                                | 20598           | 0.000                | 139784         | 1                | 1                                | 20593           | 0.000                |

| Time (Days) | Main Analysis  |                  |                                  |                 |                      |                |                  |                                  |                 |                      | Sensitivity Analysis when Delaying Censoring of Vaccinated Controls |                  |                                  |                 |                      |                |                  |                                  |                 |                      |
|-------------|----------------|------------------|----------------------------------|-----------------|----------------------|----------------|------------------|----------------------------------|-----------------|----------------------|---------------------------------------------------------------------|------------------|----------------------------------|-----------------|----------------------|----------------|------------------|----------------------------------|-----------------|----------------------|
|             | Unvaccinated   |                  |                                  |                 |                      | Vaccinated     |                  |                                  |                 |                      | Unvaccinated                                                        |                  |                                  |                 |                      | Vaccinated     |                  |                                  |                 |                      |
|             | Number at Risk | Number of Events | Discrete Time Hazard per 100,000 | Number Censored | Cumulative Incidence | Number at Risk | Number of Events | Discrete Time Hazard per 100,000 | Number Censored | Cumulative Incidence | Number at Risk                                                      | Number of Events | Discrete Time Hazard per 100,000 | Number Censored | Cumulative Incidence | Number at Risk | Number of Events | Discrete Time Hazard per 100,000 | Number Censored | Cumulative Incidence |
| 30          | 84467          | 2                | 2                                | 12503           | 0.000                | 84561          | 2                | 2                                | 12508           | 0.000                | 119110                                                              | 3                | 3                                | 17947           | 0.000                | 119190         | 2                | 2                                | 17950           | 0.000                |
| 31          | 71962          | 0                | 0                                | 6903            | 0.000                | 72051          | 0                | 0                                | 6905            | 0.000                | 101160                                                              | 1                | 1                                | 10663           | 0.000                | 101238         | 0                | 0                                | 10667           | 0.000                |
| 32          | 65059          | 0                | 0                                | 6084            | 0.000                | 65146          | 0                | 0                                | 6088            | 0.000                | 90496                                                               | 0                | 0                                | 9199            | 0.000                | 90571          | 0                | 0                                | 9205            | 0.000                |
| 33          | 58975          | 0                | 0                                | 10704           | 0.000                | 59058          | 0                | 0                                | 10713           | 0.000                | 81297                                                               | 0                | 0                                | 14861           | 0.000                | 81366          | 0                | 0                                | 14868           | 0.000                |
| 34          | 48271          | 0                | 0                                | 9761            | 0.000                | 48345          | 0                | 0                                | 9770            | 0.000                | 66436                                                               | 0                | 0                                | 13344           | 0.000                | 66498          | 0                | 0                                | 13350           | 0.000                |
| 35          | 38510          | 0                | 0                                | 10377           | 0.000                | 38575          | 0                | 0                                | 10383           | 0.000                | 53092                                                               | 0                | 0                                | 14166           | 0.000                | 53148          | 0                | 0                                | 14169           | 0.000                |
| 36          | 28133          | 1                | 4                                | 8569            | 0.000                | 28192          | 0                | 0                                | 8586            | 0.000                | 38926                                                               | 1                | 3                                | 11820           | 0.000                | 38979          | 0                | 0                                | 11836           | 0.000                |
| 37          | 19563          | 0                | 0                                | 5960            | 0.000                | 19606          | 0                | 0                                | 5974            | 0.000                | 27105                                                               | 0                | 0                                | 8242            | 0.000                | 27143          | 0                | 0                                | 8254            | 0.000                |
| 38          | 13603          | 1                | 7                                | 1833            | 0.000                | 13632          | 0                | 0                                | 1838            | 0.000                | 18863                                                               | 1                | 5                                | 2496            | 0.000                | 18889          | 0                | 0                                | 2501            | 0.000                |
| 39          | 11769          | 0                | 0                                | 1889            | 0.000                | 11794          | 0                | 0                                | 1894            | 0.000                | 16366                                                               | 0                | 0                                | 2568            | 0.000                | 16388          | 0                | 0                                | 2571            | 0.000                |
| 40          | 9880           | 0                | 0                                | 2970            | 0.000                | 9900           | 0                | 0                                | 2977            | 0.000                | 13798                                                               | 0                | 0                                | 4164            | 0.000                | 13817          | 0                | 0                                | 4170            | 0.000                |
| 41          | 6910           | 0                | 0                                | 2594            | 0.000                | 6923           | 0                | 0                                | 2601            | 0.000                | 9634                                                                | 0                | 0                                | 3556            | 0.000                | 9647           | 0                | 0                                | 3563            | 0.000                |
| 42          | 4316           | 0                | 0                                | 2193            | 0.000                | 4322           | 0                | 0                                | 2197            | 0.000                | 6078                                                                | 0                | 0                                | 3053            | 0.000                | 6084           | 0                | 0                                | 3057            | 0.000                |
| 43          | 2123           | 0                | 0                                | 1595            | 0.000                | 2125           | 0                | 0                                | 1597            | 0.000                | 3025                                                                | 0                | 0                                | 2228            | 0.000                | 3027           | 0                | 0                                | 2230            | 0.000                |
| 44          | 528            | 0                | 0                                | 528             | 0.000                | 528            | 0                | 0                                | 528             | 0.000                | 797                                                                 | 0                | 0                                | 797             | 0.000                | 797            | 0                | 0                                | 797             | 0.000                |

## References

1. Polack FP, Thomas SJ, Kitchin N, et al. Safety and Efficacy of the BNT162b2 mRNA Covid-19 Vaccine. *N Engl J Med* 2020;383(27):2603–2615.
2. O’Hagan JJ, Lipsitch M, Hernán MA. Estimating the per-exposure effect of infectious disease interventions. *Epidemiology* 2014;25(1):134–138.
3. Hernán MA. The hazards of hazard ratios. *Epidemiology* 2010;21(1):13–15.
4. Kahn R, Hitchings M, Wang R, Bellan SE, Lipsitch M. Analyzing vaccine trials in epidemics with mild and asymptomatic infection. *Am J Epidemiol* 2019;188(2):467–474.
5. Lipsitch M, Goldstein E, Ray GT, Fireman B. Depletion-of-susceptibles bias in influenza vaccine waning studies: how to ensure robust results. *Epidemiol Infect* 2019;147:e306.
6. Baden LR, El Sahly HM, Essink B, et al. Efficacy and Safety of the mRNA-1273 SARS-CoV-2 Vaccine. *N Engl J Med* 2020;
7. Harder VS, Stuart EA, Anthony JC. Propensity score techniques and the assessment of measured covariate balance to test causal associations in psychological research. *Psychol Methods* 2010;15(3):234–249.
8. COVID-19 Treatment Guidelines [Internet]. [cited 2021 Jan 9];Available from: <https://www.covid19treatmentguidelines.nih.gov/>
